# Supplementary material for: Permanent work disability before and after ischaemic heart disease or stroke event: a nationwide population-based cohort study in Sweden
Source: PubMed Central journal article supplement — BMJ Open. 2017 Sep 29;7(9):e017910. doi: 10.1136/bmjopen-2017-017910 (PMC5640121; doi:10.1136/bmjopen-2017-017910), 2017-09-29
Supplement: bmjopen-2017-017910.draft_revisions.pdf [file bmjopen-2017-017910.draft_revisions.pdf]

# BMJ Open

BMJ Open is committed to open peer review. As part of this commitment we make the peer review history of every article we publish publicly available.

When an article is published we post the peer reviewers' comments and the authors' responses online. We also post the versions of the paper that were used during peer review. These are the versions that the peer review comments apply to.

The versions of the paper that follow are the versions that were submitted during the peer review process. They are not the versions of record or the final published versions. They should not be cited or distributed as the published version of this manuscript.

BMJ Open is an open access journal and the full, final, typeset and author-corrected version of record of the manuscript is available on our site with no access controls, subscription charges or pay-per-view fees (<http://bmjopen.bmj.com>).

If you have any questions on BMJ Open's open peer review process please email [editorial.bmjopen@bmj.com](mailto:editorial.bmjopen@bmj.com)

# BMJ Open

## Permanent work disability before and after ischemic heart disease or stroke event: A nationwide population-based cohort study in Sweden

|                                 |                                                                                                                                                                                                                                                                                                                                                                                                                                                                                                                                                                                                                              |
|---------------------------------|------------------------------------------------------------------------------------------------------------------------------------------------------------------------------------------------------------------------------------------------------------------------------------------------------------------------------------------------------------------------------------------------------------------------------------------------------------------------------------------------------------------------------------------------------------------------------------------------------------------------------|
| Journal:                        | <i>BMJ Open</i>                                                                                                                                                                                                                                                                                                                                                                                                                                                                                                                                                                                                              |
| Manuscript ID                   | bmjopen-2017-017910                                                                                                                                                                                                                                                                                                                                                                                                                                                                                                                                                                                                          |
| Article Type:                   | Research                                                                                                                                                                                                                                                                                                                                                                                                                                                                                                                                                                                                                     |
| Date Submitted by the Author:   | 26-May-2017                                                                                                                                                                                                                                                                                                                                                                                                                                                                                                                                                                                                                  |
| Complete List of Authors:       | Ervasti, Jenni; Finnish Institute of Occupational Health, Centre of Expertise for Work Organizations<br>Virtanen, Marianna; Finnish Institute of Occupational Health, Centre of Expertise for Work Organizations<br>Lallukka, Tea; Finnish Institute of Occupational Health,<br>Friberg, Emilie<br>Kjeldgård, Linnea; Karolinska Institutet, Department of Clinical Neuroscience, Division of Insurance Medicine<br>Mittendorfer-Rutz, Ellenor; Karolinska Institutet, Clinical Neuroscience<br>Lundström, Erik; Karolinska Institutet Department of Clinical Neuroscience<br>Alexanderson, Kristina; Karolinska Institutet, |
| <b>Primary Subject Heading</b>: | Epidemiology                                                                                                                                                                                                                                                                                                                                                                                                                                                                                                                                                                                                                 |
| Secondary Subject Heading:      | Cardiovascular medicine, Occupational and environmental medicine, Public health                                                                                                                                                                                                                                                                                                                                                                                                                                                                                                                                              |
| Keywords:                       | Ischaemic heart disease < CARDIOLOGY, Stroke < NEUROLOGY, EPIDEMIOLOGY, OCCUPATIONAL & INDUSTRIAL MEDICINE                                                                                                                                                                                                                                                                                                                                                                                                                                                                                                                   |
|                                 |                                                                                                                                                                                                                                                                                                                                                                                                                                                                                                                                                                                                                              |

SCHOLARONE™  
Manuscripts

1  
2  
3  
4  
5  
6 **Permanent work disability before and after ischemic heart disease or**  
7  
8 **stroke event: A nationwide population-based cohort study in Sweden**  
9  
10

11  
12  
13  
14 Jenni Ervasti<sup>a</sup>, Marianna Virtanen<sup>a</sup>, Tea Lallukka<sup>a,b</sup>, Emilie Friberg<sup>c</sup>, Linnea Kjeldgård<sup>c</sup>,  
15  
16 Ellenor Mittendorfer-Rutz<sup>c</sup>, Erik Lundström<sup>d</sup>, Kristina Alexanderson<sup>c</sup>  
17  
18

19  
20  
21  
22 a Finnish Institute of Occupational Health, Helsinki, Finland  
23

24  
25 b Faculty of Medicine, University of Helsinki, Finland  
26

27  
28 c Division of Insurance Medicine, Department of Clinical Neuroscience, Karolinska  
29  
30 Institutet, Stockholm, Sweden  
31

32  
33 d Division of Neurology, Department of Clinical Neuroscience, Karolinska Institutet,  
34  
35 Stockholm, Sweden  
36  
37

38  
39  
40  
41 **Corresponding author:** Jenni Ervasti, Finnish Institute of Occupational Health, PB 40, FI-  
42  
43 00251 Helsinki, Finland, [jenni.ervasti@ttl.fi](mailto:jenni.ervasti@ttl.fi), tel. +35843825 5475  
44  
45  
46  
47  
48  
49  
50  
51  
52  
53  
54  
55  
56  
57  
58  
59  
60

## ABSTRACT

**Objectives:** We examined the risk of disability pension before and after ischemic heart disease (IHD) or stroke event, the burden of stroke compared to IHD, and which factors predicted disability pension after either event.

**Design:** A population cohort study with follow-up five years before and after the event. Register data were analysed with logistic and Poisson regression models including interaction tests for event type (IHD/stroke).

**Setting and participants:** All people living in Sweden, aged 25–60 years at the event year, who had been living in Sweden for five years before the event and had no indication of IHD or stroke prior to the index event in 2006–2008 were included, except for cases in which death occurred within 30 days of the event. People with both IHD and stroke were excluded, resulting in 18 480 cases of IHD (65%) and 9750 stroke cases (35%).

**Primary outcome measures:** Disability pension.

**Results:** Of those going to suffer IHD or stroke event, 25% were already on disability pension a year before the event. The adjusted odds ratio (OR) for disability pension was 2.64 fold (95% CI 2.25-3.11) for people with stroke compared to IHD at first post-event year. Economic inactivity predicted disability pension regardless of event type (OR=3.40; 95% CI 2.85-4.04). Comorbid mental disorder was associated with the greatest risk (OR=3.60; 95% CI 2.69-4.83) after an IHD event. As regards stroke, medical procedure, a proxy for event severity, was the largest contributor (OR=2.27, 95% CI 1.43-3.60).

**Conclusions:** While IHD event was more common, stroke caused more permanent work disability. Demographic, socioeconomic and comorbidity -related factors predicted disability

1  
2  
3 pension both before and after the event. The results help occupational and other health care  
4  
5 professionals to identify vulnerable groups at risk for permanent exclusion from labour  
6  
7 market after such an event.  
8  
9

10  
11  
12  
13 **Keywords:** Cardiovascular disease; Cohort studies; Ischemic heart disease; Occupational  
14  
15 Health; Stroke  
16  
17

18  
19  
20  
21 **Strengths and limitations of this study:**  
22

- 23  
24  
25 • With large population-based cohort data with reliable register-based measures and no  
26  
27 loss to follow up, we provided information about how ischemic heart disease (IHD)  
28  
29 and stroke events were linked with risk of permanent work disability, i.e., disability  
30  
31 pension.  
32  
33  
34 • Compared to previous studies focusing on IHD, we had a longer follow up – five  
35  
36 years – both before and after the event.  
37  
38  
39 • We were able to include a large set of predictors of disability pension, including  
40  
41 sociodemographic factors, comorbid conditions, and medical procedure.  
42  
43  
44 • The results may help when planning preventive measures for permanent work  
45  
46 disability after IHD or stroke event.  
47  
48  
49 • As we were only able to include information that was available in administrative  
50  
51 registers, we had no data on quality and outcome of post-event care, individuals'  
52  
53 health behaviours or workplace psychosocial factors.  
54  
55  
56  
57  
58  
59  
60

## INTRODUCTION

Worldwide, 11% of the total disease burden as measured with disability-adjusted life years, is attributed to ischemic heart disease (IHD) and stroke.[1] Due to improved treatment of both IHD and stroke contributing to declining mortality,[2] and because of the pressures of extended working careers, the proportion of working-age people with cardiovascular disease is likely to increase. While 53-73% of people suffering a cardiovascular event return to work,[3-6] significantly higher proportion leaves working life permanently during the years following a cardiovascular event than among people without such disability.[7] In order to help people with this disability to continue working, it is important to study the risk factors leading to permanent work disability (i.e., disability pension) after a cardiovascular event.

Disease severity, comorbidity, female sex, higher age, and lower socioeconomic status have been found to predict disability pension after an IHD event.[7-12] However, we found no previous research that specifically examined the predictors of disability pension after a stroke event. Research on stroke has focused on return to work, which has been associated with a less serious disability, younger age, higher socioeconomic position, and less cardiovascular risk factors.[4-6] While IHD and stroke share several common risk factors, some discrepancies also point to differential pattern of predictors.[13] Previous studies have not examined whether differences exist between the predictors of disability pension after IHD and stroke events.

Our aim was to (a) determine the proportion and characteristics of people who suffered an IHD or stroke event at working age who were initially on disability pension prior to the event; and (b) examine the medical (comorbidity, event severity) and non-medical

1  
2  
3 (demographic and socioeconomic) predictors of disability pension in the first post-event year,  
4  
5 including examining difference in IHD and stroke cases.  
6  
7

8 From a labour force policy perspective, it is important to determine whether the  
9  
10 predictors of disability pension shortly after the event are different from those that predict  
11  
12 disability pension in the longer run. Thus, as a sensitivity analysis, we studied the medical  
13  
14 and non-medical predictors of disability pension in the fifth post-event year and whether  
15  
16 there were differences between IHD and stroke cases.  
17  
18  
19  
20  
21  
22  
23  
24  
25  
26  
27  
28  
29  
30  
31  
32  
33  
34  
35  
36  
37  
38  
39  
40  
41  
42  
43  
44  
45  
46  
47  
48  
49  
50  
51  
52  
53  
54  
55  
56  
57  
58  
59  
60

## METHODS

### Study design

The study was a part of the Insurance Medicine All Sweden project, approved by the Regional Ethical Review Board, Stockholm, Sweden. Data are obtained from Swedish authorities and from several administrative registers and linked using the personal identity number assigned to all residents in Sweden. The following registers were used:

1. Statistics Sweden: Longitudinal Integration Database for Health Insurance and Labour Market Studies (LISA) on sex, age, education, family situation, place of birth, type of living area, and labour market activity
2. National Board of Health and Welfare: diagnosis-specific data on hospitalizations and specialized outpatient care (coded according to the International Classification of Diseases (ICD-10)[14]; medical procedures; cancer register; date of death
3. National Social Insurance Agency: Annual sickness absence data (pre-event) and disability pension data.

Our study cohort consisted of all people living in Sweden, who at the event year were aged 25 to 60 years, had been living in Sweden for five years before the event, and had no indication of cardiovascular events in the registers between 2001 and the event year. First event dates in 2006, 2007, and 2008 were included, except for cases in which death occurred within 30 days of the event. This resulted in a sample of 28 374 cases. The data on cumulative disability pension were gathered five years prior to the event date, and five years



1  
2  
3 after the event. People with both IHD and stroke were excluded (n=144), resulting in 18 480  
4  
5 cases of IHD and 9750 stroke cases.  
6  
7

8 In prospective analyses on the predictors of disability pension in the first and  
9  
10 fifth post-event year, individuals already on disability pension at the time of the event and  
11  
12 people with more than 730 sickness absence days (two years) prior to the event were  
13  
14 excluded (n=7547), resulting in a cohort of 20 683 individuals. Those who died were  
15  
16 excluded from the death year onwards. This resulted in a final sample of 20 498 individuals  
17  
18 for analyses of the onset of disability pension during the first post-event year (185 individuals  
19  
20 died during the first year), and 19 771 for analysis of the onset of disability pension in the  
21  
22 fifth post-event year (912 individuals died during the five subsequent years). Supplementary  
23  
24 Figure 1 shows a flow chart of inclusion and exclusion criteria regarding each of the study  
25  
26 questions.  
27  
28  
29  
30  
31  
32

### 33 **Measures**

34  
35  
36  
37  
38  
39 An IHD event was based on hospitalization for myocardial infarction or other IHD, excluding  
40  
41 angina pectoris (i.e., codes I21–I25 were included). A stroke event was based on  
42  
43 hospitalization for stroke (ICD-10 codes I60, I61, I63, and I64).  
44  
45  
46

47 For the outcome, annual data on granted disability pensions were gathered. In  
48  
49 Sweden, all individuals aged 30 to 64, including people with no previous income, can be  
50  
51 granted disability pension if their working capacity is permanently reduced owing to disease  
52  
53 or injury. Individuals aged 19 to 29 can be granted temporary disability pension in cases of  
54  
55 reduced work capacity or in order to complete compulsory education.  
56  
57  
58  
59  
60

1  
2  
3 The predictors of disability pension, all measured in the event year, were age,  
4 sex, education, economic inactivity, type of living area, family situation, birth country,  
5 mental disorder, cancer, diabetes, and medical procedure during the event. Age was  
6 dichotomized as “50 years or less” and “more than 50 years”. Education was classified as  
7 “low” (<10 years), “intermediate” (10–12 years) or “high” (>12 years). Economic activity  
8 was coded as “economically active” (in paid work) or “economically inactive” (not in paid  
9 work, including for example the unemployed, students, and those on parental leave). Family  
10 situation was classified as “married/cohabiting”, “not married/cohabiting without children”  
11 (i.e., single), or “not married/cohabiting with children” (i.e., single parent). Birth country was  
12 dichotomized into “Sweden” or “country other than Sweden”. Type of living area was  
13 classified as “large city”, “medium-sized town”, or “small town/village”.

14  
15  
16  
17  
18  
19  
20  
21  
22  
23  
24  
25  
26  
27  
28 Cancer (ICD-10 codes C00-D48) was based on information in the cancer  
29 register, and mental disorders (F00-F99) and diabetes (E10-E14) were based on information  
30 from the patient register (inpatient and specialized outpatient care). All the diseases were  
31 coded “yes” or “no”

32  
33  
34  
35  
36  
37  
38  
39  
40  
41  
42  
43  
44  
45  
46  
47  
48  
49  
50  
51  
52  
53  
54  
55  
56  
57  
58  
59  
60  
Medical procedures at T-1 (year prior to the event) or T1 (year after the event)  
included coronary artery bypass graft, percutaneous transluminal coronary angioplasty, other  
coronary distension procedure, or intravenous intracranial procedure. People who had  
undergone at least one such procedure were coded “yes” and those without “no”.

### Statistical analysis

The cumulative incidence trend in disability pension five years before and five years after the  
event was calculated with frequencies (percentage of individuals on disability pension each

1  
2  
3 year with 95% confidence intervals [CI]) and between-group differences in disability pension  
4  
5 were tested with Chi<sup>2</sup> tests. To assess the risk of new disability pension during the first year  
6  
7 after the event (outcome incidence 3%), we used logistic regression with a logit link function,  
8  
9 which produced odds ratios (OR) with 95% CI. To examine the differences between the  
10  
11 predictors of disability pension for IHD and stroke cases, we tested the effect modification of  
12  
13 event type (IHD/stroke) and each of the predictors. When a statistically significant (p<0.05)  
14  
15 interaction effect was observed, we performed stratified analyses. Least square means  
16  
17 adjusted for all predictor variables were produced using Poisson regression analysis.  
18  
19

20  
21 In sensitivity analyses, we used the Poisson regression procedure with a log link  
22  
23 function to produce relative risks (RR) with 95% CI to estimate predictors of disability  
24  
25 pension in the fifth year after the cardiovascular event (outcome incidence 18%). Different  
26  
27 regression methods were used for the fifth and the first post-event year since OR is not a  
28  
29 good approximation of risk ratio when outcome prevalence is above 10%.[15] SAS 9.4 was  
30  
31 used for all analyses.  
32  
33  
34  
35  
36  
37  
38  
39  
40  
41  
42  
43  
44  
45  
46  
47  
48  
49  
50  
51  
52  
53  
54  
55  
56  
57  
58  
59  
60

## RESULTS

### Cumulative incidence of disability pension

Figure 1 illustrates the cumulative incidence of disability pension five years before and five years after a cardiovascular event of IHD or stroke: The cumulative incidence of disability pension was similar (up to 25%) until the event for both IHD and stroke. Thus, about a quarter of working-age people who had suffered incident IHD or a stroke were already on disability pension before the event. The highest prevalence of pre-event disability pension was observed among women (37%), people who were economically inactive (69%), had low education (36%), were born outside Sweden (35%), and had comorbid cancer (36%), mental disorder (58%), or diabetes (48%) at event year (Table 1).

After the event, the cumulative incidence of disability pension was substantially higher (reaching 50%) among people who suffered a stroke event than among those who suffered an IHD event (slightly above 30%) (Figure 1). Similar characteristics were associated with first and fifth post-event year disability pensioning, as observed before the event (Table 1.)

Table 1. Characteristics of study participants by disability pension before and after a cardiovascular (ischemic heart disease or stroke) event

|                 |                    | Pre-event disability pension |    |              | Disability pension in first post-event year |    |             | Disability pension in fifth post-event year |    |              |
|-----------------|--------------------|------------------------------|----|--------------|---------------------------------------------|----|-------------|---------------------------------------------|----|--------------|
|                 |                    | No (n=20683)                 |    | Yes (n=7547) | No (n=19802)                                |    | Yes (n=696) | No (n=16317)                                |    | Yes (n=3454) |
| Characteristics |                    | n                            | %  | %            | n                                           | %  | %           | n                                           | %  | %            |
| Sex:            | Men                | 19713                        | 78 | 22           | 15222                                       | 97 | 3           | 14661                                       | 85 | 15           |
|                 | Women              | 8517                         | 63 | 37           | 5276                                        | 96 | 4           | 5110                                        | 74 | 26           |
| Age:            | ≤50 years          | 8332                         | 79 | 21           | 6575                                        | 97 | 3           | 6412                                        | 85 | 15           |
|                 | >50 years          | 19898                        | 71 | 29           | 13923                                       | 96 | 4           | 13359                                       | 81 | 19           |
| Education:      | Low                | 7854                         | 64 | 36           | 4981                                        | 95 | 5           | 4774                                        | 80 | 20           |
|                 | Intermediate       | 14095                        | 73 | 27           | 10274                                       | 97 | 3           | 9902                                        | 83 | 17           |
|                 | High               | 6281                         | 84 | 16           | 5243                                        | 97 | 3           | 5095                                        | 84 | 16           |
| Economically:   | Active             | 20076                        | 91 | 9            | 18045                                       | 97 | 3           | 17460                                       | 85 | 15           |
|                 | Inactive           | 8154                         | 31 | 69           | 2453                                        | 90 | 10          | 2366                                        | 75 | 25           |
| Family          | Married/cohab.     | 16121                        | 78 | 22           | 12513                                       | 97 | 3           | 12181                                       | 84 | 16           |
|                 | Single, no childr. | 10310                        | 66 | 34           | 6693                                        | 96 | 4           | 6339                                        | 81 | 19           |
|                 | Single, childr.    | 1799                         | 72 | 28           | 1292                                        | 97 | 3           | 1251                                        | 80 | 20           |
| Birth country:  | Sweden             | 23126                        | 75 | 25           | 17198                                       | 97 | 3           | 16582                                       | 83 | 17           |
|                 | Other              | 5104                         | 65 | 35           | 3300                                        | 95 | 5           | 3189                                        | 80 | 20           |
| Living area:    | Large city         | 9163                         | 75 | 25           | 6776                                        | 97 | 3           | 6527                                        | 84 | 16           |
|                 | Medium-size        | 10019                        | 73 | 27           | 7212                                        | 97 | 3           | 6979                                        | 82 | 18           |

|                  |            |       |    |    |       |    |    |       |    |    |
|------------------|------------|-------|----|----|-------|----|----|-------|----|----|
|                  | Small town | 9048  | 73 | 27 | 6510  | 96 | 4  | 6265  | 82 | 18 |
| Cancer:          | Yes        | 847   | 64 | 36 | 482   | 93 | 7  | 382   | 75 | 25 |
|                  | No         | 27383 | 74 | 26 | 20016 | 97 | 3  | 19389 | 83 | 17 |
| Mental disorder: | Yes        | 3286  | 42 | 58 | 1352  | 90 | 10 | 1236  | 71 | 29 |
|                  | No         | 24944 | 77 | 23 | 19146 | 97 | 3  | 18535 | 83 | 17 |
| Diabetes:        | Yes        | 2887  | 52 | 48 | 1490  | 94 | 6  | 1381  | 75 | 25 |
|                  | No         | 25343 | 76 | 24 | 19008 | 97 | 3  | 18390 | 83 | 17 |
| Procedure*:      | Yes        | 3077  | 78 | 22 | 2379  | 97 | 3  | 2318  | 85 | 15 |
|                  | No         | 25153 | 73 | 27 | 18119 | 97 | 3  | 17453 | 82 | 18 |
| Type of event:   | IHD        | 18480 | 73 | 27 | 13450 | 98 | 2  | 13028 | 91 | 9  |
|                  | Stroke     | 9750  | 73 | 27 | 7048  | 94 | 6  | 6743  | 67 | 33 |

\*Medical procedure=coronary artery bypass graft, percutaneous transluminal coronary angioplasty, other coronary distension procedure, or intravenous intracranial procedure

Note. All p-values for difference between groups ( $\text{Chi}^2$ ) were  $<0.01$  except for 'pre-event disability pension and type of event', 'disability pension during the event year and living area', and 'disability pension during the event year and medical procedure.

### New-onset disability pension in first post-event year

Table 2 presents the both the unadjusted and adjusted results on factors associated with the risk of disability pension during the first post-event year. After adjustment for sociodemographic factors, comorbid conditions and medical procedures, stroke patients were at a higher risk of disability pension during the first post-event year than people who had suffered an IHD event (OR=2.79; 95% CI 2.37-3.29). Among both IHD and stroke patients, older age (OR=1.66; 95% CI 1.38-1.98), low education (OR=1.58; 95% CI 1.27-1.97), economic inactivity (OR=3.40; 95% CI 2.85-4.04), being single without children (OR=1.25; 95% CI 1.06-1.48), birth country other than Sweden (OR=1.27; 95% CI 1.04-1.55), living in small towns (OR=1.32; 95% CI 1.08-1.61), and comorbid cancer (OR=1.85; 95% CI 1.27-2.69) were associated with higher odds of disability pension in the first post-event year.

Table 2. Predictors of disability pension during first year after cardiovascular event. In case of significant interaction ( $p < 0.05$ ), analyses are stratified by event type.

|               |                    | IHD or stroke |           |           |           | P for interaction with event type (IHD/stroke) | IHD       |           | Stroke    |           |
|---------------|--------------------|---------------|-----------|-----------|-----------|------------------------------------------------|-----------|-----------|-----------|-----------|
|               |                    | Crude OR      | 95% CI    | OR*       | 95% CI    |                                                | OR†       | 95% CI    | OR†       | 95% CI    |
| Age:          | ≤50 years          | 1 (=Ref.)     |           | 1 (=Ref.) |           | 0.26                                           |           |           |           |           |
|               | >50 years          | 1.35          | 1.13-1.60 | 1.66      | 1.38-1.98 |                                                |           |           |           |           |
| Sex:          | Men                | 1 (=Ref.)     |           | 1 (=Ref.) |           | 0.03                                           | 1 (=Ref.) |           | 1 (=Ref.) |           |
|               | Women              | 1.48          | 1.26-1.74 | 1.34      | 1.13-1.59 |                                                | 1.62      | 1.25-2.11 | 1.12      | 0.90-1.39 |
| Education:    | High               | 1 (=Ref.)     |           | 1 (=Ref.) |           | 0.57                                           |           |           |           |           |
|               | Intermediate       | 1.19          | 0.97-1.45 | 1.10      | 0.89-1.35 |                                                |           |           |           |           |
|               | Low                | 1.86          | 1.51-2.31 | 1.58      | 1.27-1.97 |                                                |           |           |           |           |
| Economically: | Active             | 1 (=Ref.)     |           | 1 (=Ref.) |           | 0.14                                           |           |           |           |           |
|               | Inactive           | 4.15          | 3.53-4.89 | 3.40      | 2.85-4.04 |                                                |           |           |           |           |
| Family        | Married/cohab.     | 1 (=Ref.)     |           | 1 (=Ref.) |           | 0.82                                           |           |           |           |           |
|               | Single, no childr. | 1.56          | 1.33-1.83 | 1.25      | 1.06-     |                                                |           |           |           |           |



|                  |                 |           |           |           |           |       |           |           |                |
|------------------|-----------------|-----------|-----------|-----------|-----------|-------|-----------|-----------|----------------|
|                  |                 |           |           |           | 1.48      |       |           |           |                |
|                  | Single, childr. | 1.20      | 0.87-1.65 | 0.94      | 0.67-1.31 |       |           |           |                |
| Birth country:   | Sweden          | 1 (=Ref.) |           | 1 (=Ref.) |           | 0.51  |           |           |                |
|                  | Other           | 1.52      | 1.26-1.82 | 1.27      | 1.04-1.55 |       |           |           |                |
| Living area:     | Large city      | 1 (=Ref.) |           | 1 (=Ref.) |           | 0.14  |           |           |                |
|                  | Medium-size     | 1.03      | 0.85-1.24 | 1.16      | 0.96-1.41 |       |           |           |                |
|                  | Small town      | 1.13      | 0.93-1.35 | 1.32      | 1.08-1.61 |       |           |           |                |
| Cancer:          | Yes             | 1 (=Ref.) |           | 1 (=Ref.) |           | 0.38  |           |           |                |
|                  | No              | 2.15      | 1.49-3.08 | 1.85      | 1.27-2.69 |       |           |           |                |
| Mental disorder: | Yes             | 1 (=Ref.) |           | 1 (=Ref.) |           | 0.006 | 1 (=Ref.) | 1 (=Ref.) |                |
|                  | No              | 3.46      | 2.83-4.22 | 2.54      | 2.05-3.14 |       | 3.60      | 2.69-4.83 | 1.90 1.41-2.55 |
| Diabetes:        | Yes             | 1 (=Ref.) |           | 1 (=Ref.) |           | 0.02  | 1 (=Ref.) | 1 (=Ref.) |                |
|                  | No              | 2.01      | 1.60-2.51 | 1.98      | 1.56-2.51 |       | 2.49      | 1.85-3.34 | 1.40 0.94-2.08 |
| Procedure‡:      | Yes             | 1 (=Ref.) |           | 1 (=Ref.) |           | 0.02  | 1 (=Ref.) | 1 (=Ref.) |                |
|                  | No              | 0.81      | 0.62-1.04 | 1.12      | 0.85-1.46 |       | 0.88      | 0.64-1.22 | 2.13 1.33-3.42 |
| Type of event:   | IHD             | 1 (=Ref.) |           | 1 (=Ref.) |           |       |           |           |                |
|                  | Stroke          | 2.64      | 2.27-3.08 | 2.79      | 2.37-     |       |           |           |                |

---

3.29

---

\* Multivariable model; all variables are entered simultaneously into the model

† Estimates are adjusted for all other variables

‡ Medical procedure =coronary artery bypass graft, percutaneous transluminal coronary angioplasty, other coronary distension procedure, or intravenous intracranial procedure

### Differences between IHD and stroke

The following interactions with event type were significant: sex, mental disorder, diabetes, and medical procedure. Women who had suffered an IHD event had 1.62 (95% CI 1.25-2.11) times higher odds of disability pension in the first post-event year than male IHD patients, whereas sex was not associated with disability pension among stroke patients. Among IHD cases, mental disorder was associated with 3.60 (95% CI 2.69-4.83) times higher odds of disability pension during the first post-event year compared with people without a mental disorder, whereas the corresponding odds ratio among stroke cases was 1.90 (95% CI 1.41-2.55). Comorbid diabetes was associated with 2.49 (95% CI 1.85-3.34) times higher odds of disability pension. It was not associated with the risk of disability pension among people who had suffered a stroke. Among stroke cases, having undergone a medical procedure was associated with 2.13 (95% CI 1.33-3.42) times higher odds of disability pension in the first year after the event than among those who did not receive such procedure. (Table 2.) These interactions, and absolute differences between IHD and stroke cases, are further illustrated in Figure 2, where we present percentages of those who ended up on disability pension adjusted for other predictor variables.

### Sensitivity analysis: Disability pension in fifth post-event year

Supplementary Table 1 presents the results regarding the factors associated with the risk of disability pension in the fifth post-event year after an IHD or stroke event. The main effects corresponded to those in first post-event year, but effect modification by event type was observed more often, indicating larger differences between IHD and stroke in disability

1  
2  
3 pension in the fifth post-year. Interaction terms observed at first post-year remained  
4  
5 statistically significant, but also several other interactions emerged. Those with less  
6  
7 education, economically inactive, and who were born elsewhere than Sweden were at a  
8  
9 higher risk of disability pension, especially among the IHD cases.  
10  
11  
12  
13  
14  
15  
16  
17  
18  
19  
20  
21  
22  
23  
24  
25  
26  
27  
28  
29  
30  
31  
32  
33  
34  
35  
36  
37  
38  
39  
40  
41  
42  
43  
44  
45  
46  
47  
48  
49  
50  
51  
52  
53  
54  
55  
56  
57  
58  
59  
60

## DISCUSSION

We found that among the working-age population of Sweden, the incidence of disability pension was similar five years before the first IHD or stroke event. About 25% of the cohort were already on disability pension one year prior to the event, with significant overrepresentation of socioeconomically disadvantaged. This corresponds to earlier studies which have reported pre-event disability pension prevalence of 22–29%. [3, 16-18] We showed that similar sociodemographic characteristics and pre-existing comorbid conditions were associated with pre-event and post-event disability pension.

People who had suffered a stroke had a substantially higher incidence of disability pension after the event (up to 50% during the five subsequent years) than people who had suffered an IHD event (up to 30%). Thus, although the incidence of an IHD event (18 480 cases in three years) was more common than the incidence of stroke (9750 cases in three years), the disability burden of stroke was greater than that of IHD.

Female sex, older age, lower education, economic inactivity, immigrant status, living in rural areas, and having comorbid conditions were all risk factors for disability pension after cardiovascular events, which corresponds to previous studies. [4, 5, 7, 9-12, 19]. The risk of disability pension after the event was higher among women than among men with IHD, but we observed no sex difference regarding stroke. Other research has reported significantly better long-term prognosis among women, [20] but no sex difference in mortality due to stroke. [21] Thus, the higher risk of disability pension after an IHD event among women may reflect women's higher probability of disability pension in general, [22] or may be related to men's higher risk of cardiovascular mortality before disability pension is granted.

1  
2  
3 As comorbid conditions contributed to exit to disability pension, it is possible  
4 that part of these disability pension awards are due to causes other than cardiovascular  
5 diseases. As the incidence of disability pension increased markedly after the cardiovascular  
6 event, it is unlikely that comorbid conditions can explain all disability pensions. Having had  
7 medical procedure related to the event was associated with disability pension shortly after a  
8 stroke event. Medical procedure can be viewed as a proxy for the severity of the event. Thus,  
9 risk groups for disability pension shortly after a stroke are those who suffer a more severe  
10 event, which corresponds to earlier results regarding return to work.[4, 5]  
11  
12  
13  
14  
15  
16  
17  
18  
19  
20

21 Although the relative difference in the risk of disability pension between those  
22 with and without comorbid mental disorder and diabetes was larger for IHD cases than for  
23 stroke cases, the highest absolute risk was found among those who had suffered a stroke and  
24 had mental disorder or diabetes. Mental disorders, particularly depression, associated with an  
25 IHD or stroke event might decrease working capacity by reducing functional capacity, and by  
26 preventing the patient from participating in physical rehabilitation and cognitive therapies,  
27 adhering to medical procedures, or making the necessary lifestyle changes needed to achieve  
28 working capacity after IHD or a stroke.[23] Diabetes has been associated with excess risk of  
29 death following myocardial infarction.[24]  
30  
31  
32  
33  
34  
35  
36  
37  
38  
39  
40  
41

42 In Sweden, people can be granted disability pension even without a history of  
43 sick leave. However, even if it is rather certain that the person will not return to work after,  
44 for example, a severe stroke, the patient or the relatives seldom apply for disability pension as  
45 the benefit is usually lower than that for sick leave. The main reason for applying for  
46 disability pension immediately after the disability event is that one cannot get sickness  
47 absence benefits (not having had income from work or unemployment benefit). Apart from  
48 certain specific exceptions (e.g., ongoing treatment), one cannot be on sick leave for more  
49 than 365 consecutive days. Thus, people who were awarded disability pension during the first  
50  
51  
52  
53  
54  
55  
56  
57  
58  
59  
60

1  
2  
3 post-event year were possibly in a poorer labour market position, which prevented them from  
4  
5 applying for sickness absence benefits. This corresponds to our findings, since economic  
6  
7 inactivity was the strongest predictor of disability pension in the first post-event year  
8  
9 regardless of event type. Other indicators of poorer labour market position, such as low  
10  
11 education and birth country other than Sweden, were also predictive of fast exit to disability  
12  
13 pension.  
14

15  
16  
17 Socioeconomic background and comorbid conditions explained the risk of  
18  
19 disability pension five years after the event to a greater extent among IHD than stroke cases.  
20  
21 This is noteworthy, since poorer labour market position and not fulfilling the criteria for  
22  
23 entitlement to sickness absence benefits cannot explain disability pension in the fifth post-  
24  
25 event year. The often higher severity of stroke compared to IHD may explain this difference;  
26  
27 after an IHD event, the probability of recovering to relatively good working capacity may be  
28  
29 higher. However, the observed differences in this recovery seem to relate to socioeconomic  
30  
31 characteristics and resources; the background factors may affect people's recovery and  
32  
33 rehabilitation.[25] Stroke, often a more disabling cardiovascular event, may more totally  
34  
35 reduce working capacity, and hence we found smaller individual differences. However, a  
36  
37 socioeconomic gradient has also been observed in short- and long-term outcomes after a  
38  
39 stroke.[26]  
40  
41  
42  
43

44  
45 The major strength of this study was its large population-based cohort data with  
46  
47 reliable register-based measures of high coverage and specificity,[27] and no loss to follow  
48  
49 up. Compared to previous studies, we also had a longer follow up – five years – both before  
50  
51 and after the event. We were able to include a large set of predictors of disability pension,  
52  
53 including sociodemographic factors, comorbid conditions, and medical procedure.  
54  
55  
56  
57  
58  
59  
60

1  
2  
3 The register data also have some limitations: we were only able to include  
4 information that was available in administrative registers. This meant that we had no  
5 information on quality and outcome of post-event care, individuals' health behaviours or  
6 workplace psychosocial factors, which are typically collected in surveys, and have previously  
7 been linked to disability pension in general populations.[28] However, a recent study among  
8 Finnish public sector employees demonstrated that the contribution of health behaviours and  
9 workplace psychosocial factors to the risk of disability pension was relatively small  
10 compared to the contribution of comorbidity, especially mental comorbidity.[7] As regards  
11 post-event care, men were more likely to enrol in disease management program than women  
12 after coronary heart disease in Germany.[29]  
13  
14  
15  
16  
17  
18  
19  
20  
21  
22  
23  
24  
25  
26  
27

## 28 Conclusions

29  
30  
31  
32  
33  
34 Our results quantify and emphasize the burden of IHD and stroke to the labour market, and  
35 help occupational and other health care professionals to identify vulnerable groups at risk for  
36 permanent exclusion from labour market after such an event. While IHD event was more  
37 common, stroke caused more permanent work disability. As regards IHD, non-medical risk  
38 factors contributed to the risk of disability pension, whereas medical factors contributed to  
39 the risk of disability pension after stroke. This knowledge may be beneficial when planning  
40 interventions to prevent permanent work disability after either event.  
41  
42  
43  
44  
45  
46  
47  
48  
49  
50  
51  
52  
53  
54  
55  
56  
57  
58  
59  
60



1  
2  
3 **Contributors:** JE, MV, TL, EMR and KA contributed to conception and design. JE analysed  
4  
5 the data and drafted the manuscript. All authors contributed either to analysis, interpretation  
6  
7 or acquisition of the data, and critically revised the manuscript. All gave final approval and  
8  
9 agree to be accountable for all aspects ensuring integrity and accuracy.  
10

11  
12 **Funding:** This study was supported by the Swedish Research Council for Health, Working  
13  
14 Life and Welfare. JE, MV and TL were supported by the Academy of Finland (projects  
15  
16 258598, 292824, 287488). The funding organizations had no role in the study design, data  
17  
18 collection, analysis, interpretation of the data, writing the report or in the decision to submit  
19  
20 the paper.  
21  
22

23  
24 **Competing interest:** None declared.  
25  
26

27 **Ethics approval:** Ethical approval was obtained from the Regional Ethical Review Board,  
28  
29 Stockholm, Sweden.  
30  
31

32 **Data sharing statement:** No additional data available.  
33  
34  
35  
36  
37  
38  
39  
40  
41  
42  
43  
44  
45  
46  
47  
48  
49  
50  
51  
52  
53  
54  
55  
56  
57  
58  
59  
60

## REFERENCES

- 1 GBD Compare Data Visualization. Seattle, WA: Institute for Health Metrics and Evaluation (IHME), University of Washington 2016.
- 2 Schmidt M, Jacobsen JB, Lash TL, *et al.* 25 year trends in first time hospitalisation for acute myocardial infarction, subsequent short and long term mortality, and the prognostic impact of sex and comorbidity: a Danish nationwide cohort study. *BMJ (Clinical research ed)* 2012;**344**:e356.
- 3 Hamalainen H, Maki J, Virta L, *et al.* Return to work after first myocardial infarction in 1991-1996 in Finland. *Eur J Public Health* 2004;**14**:350-3.
- 4 Peters GO, Buni SG, Oyeyemi AY, *et al.* Determinants of return to work among Nigerian stroke survivors. *Disability and rehabilitation* 2013;**35**:455-9.
- 5 Bonner B, Pillai R, Sarma PS, *et al.* Factors predictive of return to work after stroke in patients with mild-moderate disability in India. *European journal of neurology* 2016;**23**:548-53.
- 6 Catalina-Romero C, Ruilope LM, Sanchez-Chaparro MA, *et al.* Factors influencing return-to-work after cerebrovascular disease: the importance of previous cardiovascular risk. *European journal of preventive cardiology* 2015;**22**:1220-7.
- 7 Ervasti J, Kivimaki M, Pentti J, *et al.* Health- and work-related predictors of work disability among employees with a cardiometabolic disease--A cohort study. *J Psychosom Res* 2016;**82**:41-7.
- 8 Lundbom J, Myhre HO, Ystgaard B, *et al.* Factors influencing return to work after aortocoronary bypass surgery. *Scandinavian journal of thoracic and cardiovascular surgery* 1992;**26**:187-92.

1  
2  
3 9 Jespersen L, Abildstrom SZ, Hvelplund A, *et al.* Symptoms of angina  
4  
5 pectoris increase the probability of disability pension and premature exit from the workforce  
6  
7 even in the absence of obstructive coronary artery disease. *European heart journal*  
8  
9 2013;**34**:3294-303.

10  
11 10 Osler M, Martensson S, Prescott E, *et al.* Impact of gender, co-morbidity  
12  
13 and social factors on labour market affiliation after first admission for acute coronary  
14  
15 syndrome. A cohort study of Danish patients 2001-2009. *PLoS One* 2014;**9**:e86758.

16  
17 11 Zetterstrom K, Vaez M, Alexanderson K, *et al.* Disability pension after  
18  
19 coronary revascularization: a prospective nationwide register-based Swedish cohort study.  
20  
21 *European journal of preventive cardiology* 2015;**22**:304-11.

22  
23 12 Gunn J, Kiviniemi T, Biancari F, *et al.* Predictors of permanent work  
24  
25 disability among  $\leq 50$ -year-old patients undergoing percutaneous coronary intervention.  
26  
27 *Scand J Work Environ Health* 2015;**41**:460-6.

28  
29 13 Hamer M, Batty GD, Stamatakis E, *et al.* Comparison of risk factors for  
30  
31 fatal stroke and ischemic heart disease: a prospective follow up of the health survey for  
32  
33 England. *Atherosclerosis* 2011;**219**:807-10.

34  
35 14 *International Statistical Classification of Diseases and Related Health*  
36  
37 *Problems (ICD-10)*. Geneva, Switzerland: World Health Organization 1994.

38  
39 15 Deddens JA, Petersen MR. Approaches for estimating prevalence ratios.  
40  
41 *Occupational and environmental medicine* 2008;**65**:481, 501-6.

42  
43 16 Teasdale TW, Engberg AW. Disability pensions in relation to stroke: a  
44  
45 population study. *Brain injury* 2002;**16**:997-1009.

46  
47 17 Medin J, Nordlund A, Ekberg K. Sick leave, disability pension and health-  
48  
49 care-seeking behaviour prior to stroke, among people aged 30-65: a case-control study. *Brain*  
50  
51 *injury* 2007;**21**:457-63.

- 1  
2  
3 18 Zetterstrom K, Voss M, Alexanderson K, *et al.* Disability Pension at the  
4 Time of Coronary Revascularisation Is Associated with Higher Five-Year Mortality; A  
5 Swedish Nationwide, Register-Based Prospective Cohort Study. *PLoS One*  
6  
7 2015;**10**:e0135277.  
8  
9  
10  
11 19 Dreyer RP, Xu X, Zhang W, *et al.* Return to Work After Acute Myocardial  
12 Infarction: Comparison Between Young Women and Men. *Circulation Cardiovascular*  
13 *quality and outcomes* 2016;**9**:S45-52.  
14  
15  
16  
17 20 van der Meer MG, Cramer MJ, van der Graaf Y, *et al.* Gender difference in  
18 long-term prognosis among patients with cardiovascular disease. *European journal of*  
19 *preventive cardiology* 2014;**21**:81-9.  
20  
21  
22  
23 21 Mosca L, Barrett-Connor E, Wenger NK. Sex/gender differences in  
24 cardiovascular disease prevention: what a difference a decade makes. *Circulation*  
25 2011;**124**:2145-54.  
26  
27  
28  
29 22 Falkstedt D, Backhans M, Lundin A, *et al.* Do working conditions explain  
30 the increased risks of disability pension among men and women with low education? A  
31 follow-up of Swedish cohorts. *Scand J Work Environ Health* 2014;**40**:483-92.  
32  
33  
34  
35 23 Kutlubaev MA, Hackett ML. Part II: predictors of depression after stroke  
36 and impact of depression on stroke outcome: an updated systematic review of observational  
37 studies. *International journal of stroke : official journal of the International Stroke Society*  
38 2014;**9**:1026-36.  
39  
40  
41  
42 24 Alabas OA, Hall M, Dondo TB, *et al.* Long-term excess mortality  
43 associated with diabetes following acute myocardial infarction: a population-based cohort  
44 study. *J Epidemiol Community Health* 2017;**71**:25-32.  
45  
46  
47  
48 25 Myers V, Drory Y, Goldbourt U, *et al.* Multilevel socioeconomic status and  
49 incidence of frailty post myocardial infarction. *Int J Cardiol* 2014;**170**:338-43.  
50  
51  
52  
53  
54  
55  
56  
57  
58  
59  
60

1  
2  
3 26 Marshall IJ, Wang Y, Crichton S, *et al.* The effects of socioeconomic status  
4 on stroke risk and outcomes. *The Lancet Neurology* 2015;**14**:1206-18.  
5

6  
7 27 Ludvigsson JF, Andersson E, Ekbom A, *et al.* External review and  
8 validation of the Swedish national inpatient register. *BMC Public Health* 2011;**11**:450.  
9

10  
11 28 Albertsen K, Lund T, Christensen KB, *et al.* Predictors of disability pension  
12 over a 10-year period for men and women. *Scand J Public Health* 2007;**35**:78-85.  
13

14  
15 29 Bozorgmehr K, Maier W, Brenner H, *et al.* Social disparities in Disease  
16 Management Programmes for coronary heart disease in Germany: a cross-classified  
17  
18  
19  
20  
21  
22  
23  
24  
25  
26  
27  
28  
29  
30  
31  
32  
33  
34  
35  
36  
37  
38  
39  
40  
41  
42  
43  
44  
45  
46  
47  
48  
49  
50  
51  
52  
53  
54  
55  
56  
57  
58  
59  
60

multilevel analysis. *J Epidemiol Community Health* 2015;**69**:1091-101.

1  
2  
3 **Figure legends:**  
4  
5  
6  
7

8  
9 **Figure 1.** Cumulative incidence of disability pension 5 years before and 5 years after  
10 cardiovascular event, unadjusted. The arrow indicates the event. IHD=ischemic heart disease.  
11  
12

13  
14  
15  
16  
17 **Figure 2.** Adjusted percentage of people suffering an IHD or stroke event ending up on  
18 disability pension during first post-event year. Exponentiated least square means ( $\times 100$ )  
19 adjusted for sex, age, education, economic inactivity, family situation, birth country, type of  
20 living area, mental disorder, diabetes, cancer, and medical procedure. Error bars indicate 95%  
21 confidence intervals. IHD=ischemic heart disease.  
22  
23  
24  
25  
26  
27  
28  
29  
30  
31  
32  
33  
34  
35  
36  
37  
38  
39  
40  
41  
42  
43  
44  
45  
46  
47  
48  
49  
50  
51  
52  
53  
54  
55  
56  
57  
58  
59  
60

1  
2  
3  
4  
5  
6  
7  
8  
9  
10  
11  
12  
13  
14  
15  
16  
17  
18  
19  
20  
21  
22  
23  
24  
25  
26  
27  
28  
29  
30  
31  
32  
33  
34  
35  
36  
37  
38  
39  
40  
41  
42  
43  
44  
45  
46  
47  
48  
49  
50  
51  
52  
53  
54  
55  
56  
57  
58  
59  
60

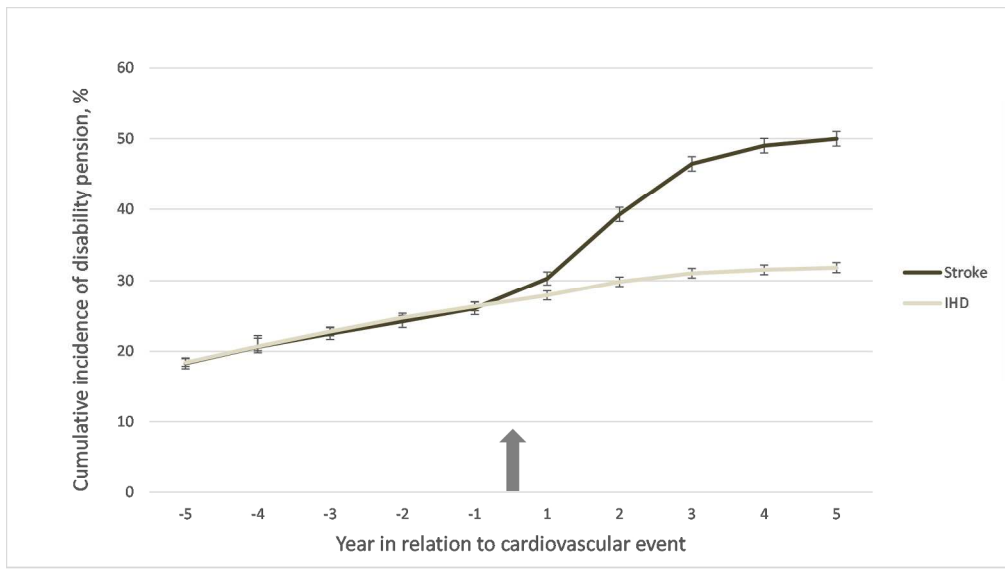

Figure 1. Cumulative incidence of disability pension 5 years before and 5 years after cardiovascular event, unadjusted. The arrow indicates the event. IHD=ischemic heart disease.

review only

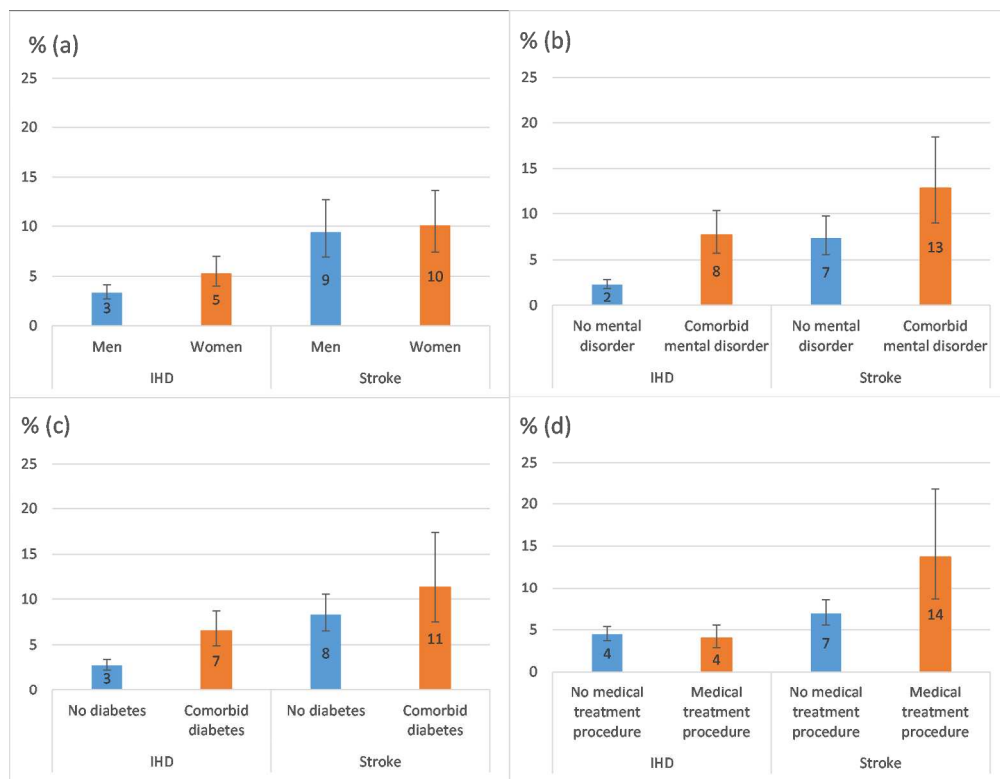

Figure 2. Adjusted percentage of people suffering an IHD or stroke event ending up on disability pension during first post-event year. Exponentiated least square means ( $\times 100$ ) adjusted for sex, age, education, economic inactivity, family situation, birth country, type of living area, mental disorder, diabetes, cancer, and medical procedure. Error bars indicate 95% confidence intervals. IHD=ischemic heart disease.



Supplementary Table 1. Predictors of disability pension in five year follow-up after cardiovascular (ischemic heart disease or stroke) event. In case of significant interaction ( $p < 0.05$ ), analyses are stratified by event type.

|                |                    | IHD or stroke |           |           |           | P for interaction with event type (IHD/stroke) | IHD       |           | Stroke    |           |
|----------------|--------------------|---------------|-----------|-----------|-----------|------------------------------------------------|-----------|-----------|-----------|-----------|
|                |                    | Crude RR      | 95% CI    | RR*       | 95% CI    |                                                | RR†       | 95% CI    | RR†       | 95% CI    |
| Age:           | ≤50 years          | 1 (=Ref.)     |           | 1 (=Ref.) |           | 0.99                                           |           |           |           |           |
|                | >50 years          | 1.23          | 1.14-1.32 | 1.45      | 1.35-1.57 |                                                |           |           |           |           |
| Sex:           | Men                | 1 (=Ref.)     |           | 1 (=Ref.) |           | <0.001                                         | 1 (=Ref.) |           | 1 (=Ref.) |           |
|                | Women              | 1.77          | 1.65-1.90 | 1.45      | 1.35-1.55 |                                                | 1.81      | 1.60-2.04 | 1.29      | 1.10-1.40 |
| Education:     | High               | 1 (=Ref.)     |           | 1 (=Ref.) |           | 0.013                                          | 1 (=Ref.) |           | 1 (=Ref.) |           |
|                | Intermediate       | 1.11          | 1.02-1.21 | 1.11      | 1.02-1.21 |                                                | 1.07      | 0.92-1.25 | 1.13      | 1.02-1.26 |
|                | Low                | 1.30          | 1.19-1.43 | 1.29      | 1.17-1.42 |                                                | 1.46      | 1.24-1.71 | 1.20      | 1.07-1.36 |
| Economically:  | Active             | 1 (=Ref.)     |           | 1 (=Ref.) |           | <0.001                                         | 1 (=Ref.) |           | 1 (=Ref.) |           |
|                | Inactive           | 1.54          | 1.41-1.68 | 1.35      | 1.23-1.48 |                                                | 1.78      | 1.54-2.05 | 1.16      | 1.03-1.30 |
| Family         | Married/cohab.     | 1 (=Ref.)     |           | 1 (=Ref.) |           | 0.19                                           |           |           |           |           |
|                | Single, no childr. | 1.19          | 1.11-1.27 | 1.11      | 1.03-1.19 |                                                |           |           |           |           |
|                | Single, childr.    | 1.22          | 1.07-1.39 | 1.04      | 0.91-1.19 |                                                |           |           |           |           |
| Birth country: | Sweden             | 1 (=Ref.)     |           | 1 (=Ref.) |           | <0.001                                         | 1 (=Ref.) |           | 1 (=Ref.) |           |

|                  |             |           |           |           |           |        |           |           |           |           |
|------------------|-------------|-----------|-----------|-----------|-----------|--------|-----------|-----------|-----------|-----------|
|                  | Other       | 1.15      | 1.06-1.26 | 1.20      | 1.10-1.31 |        | 1.49      | 1.30-1.70 | 1.04      | 0.92-1.17 |
| Living area:     | Large city  | 1 (=Ref.) |           | 1 (=Ref.) |           | 0.77   |           |           |           |           |
|                  | Medium-size | 1.19      | 1.10-1.29 | 1.26      | 1.16-1.36 |        |           |           |           |           |
|                  | Small town  | 1.18      | 1.08-1.28 | 1.27      | 1.17-1.39 |        |           |           |           |           |
| Cancer:          | Yes         | 1 (=Ref.) |           | 1 (=Ref.) |           | 0.065  |           |           |           |           |
|                  | No          | 1.47      | 1.20-1.79 | 1.32      | 1.08-1.61 |        |           |           |           |           |
| Mental disorder: | Yes         | 1 (=Ref.) |           | 1 (=Ref.) |           | <0.001 | 1 (=Ref.) |           | 1 (=Ref.) |           |
|                  | No          | 1.76      | 1.58-1.96 | 1.52      | 1.36-1.70 |        | 2.35      | 1.99-2.78 | 1.19      | 1.03-1.38 |
| Diabetes:        | Yes         | 1 (=Ref.) |           | 1 (=Ref.) |           | <0.001 | 1 (=Ref.) |           | 1 (=Ref.) |           |
|                  | No          | 1.45      | 1.30-1.63 | 1.64      | 1.46-1.83 |        | 2.05      | 1.76-2.39 | 1.30      | 1.10-1.54 |
| Procedure‡:      | Yes         | 1 (=Ref.) |           | 1 (=Ref.) |           | 0.28   |           |           |           |           |
|                  | No          | 0.83      | 0.74-0.93 | 1.29      | 1.15-1.45 |        |           |           |           |           |
| Type of event:   | IHD         | 1 (=Ref.) |           | 1 (=Ref.) |           |        |           |           |           |           |
|                  | Stroke      | 3.64      | 3.39-3.90 | 3.77      | 3.50-4.06 |        |           |           |           |           |

\* Multivariable model; all variables are entered simultaneously into the model

† Estimates are adjusted for all other variables

‡ Medical procedure =coronary artery bypass graft, percutaneous transluminal coronary angioplasty, other coronary distension procedure, or intravenous intracranial procedure

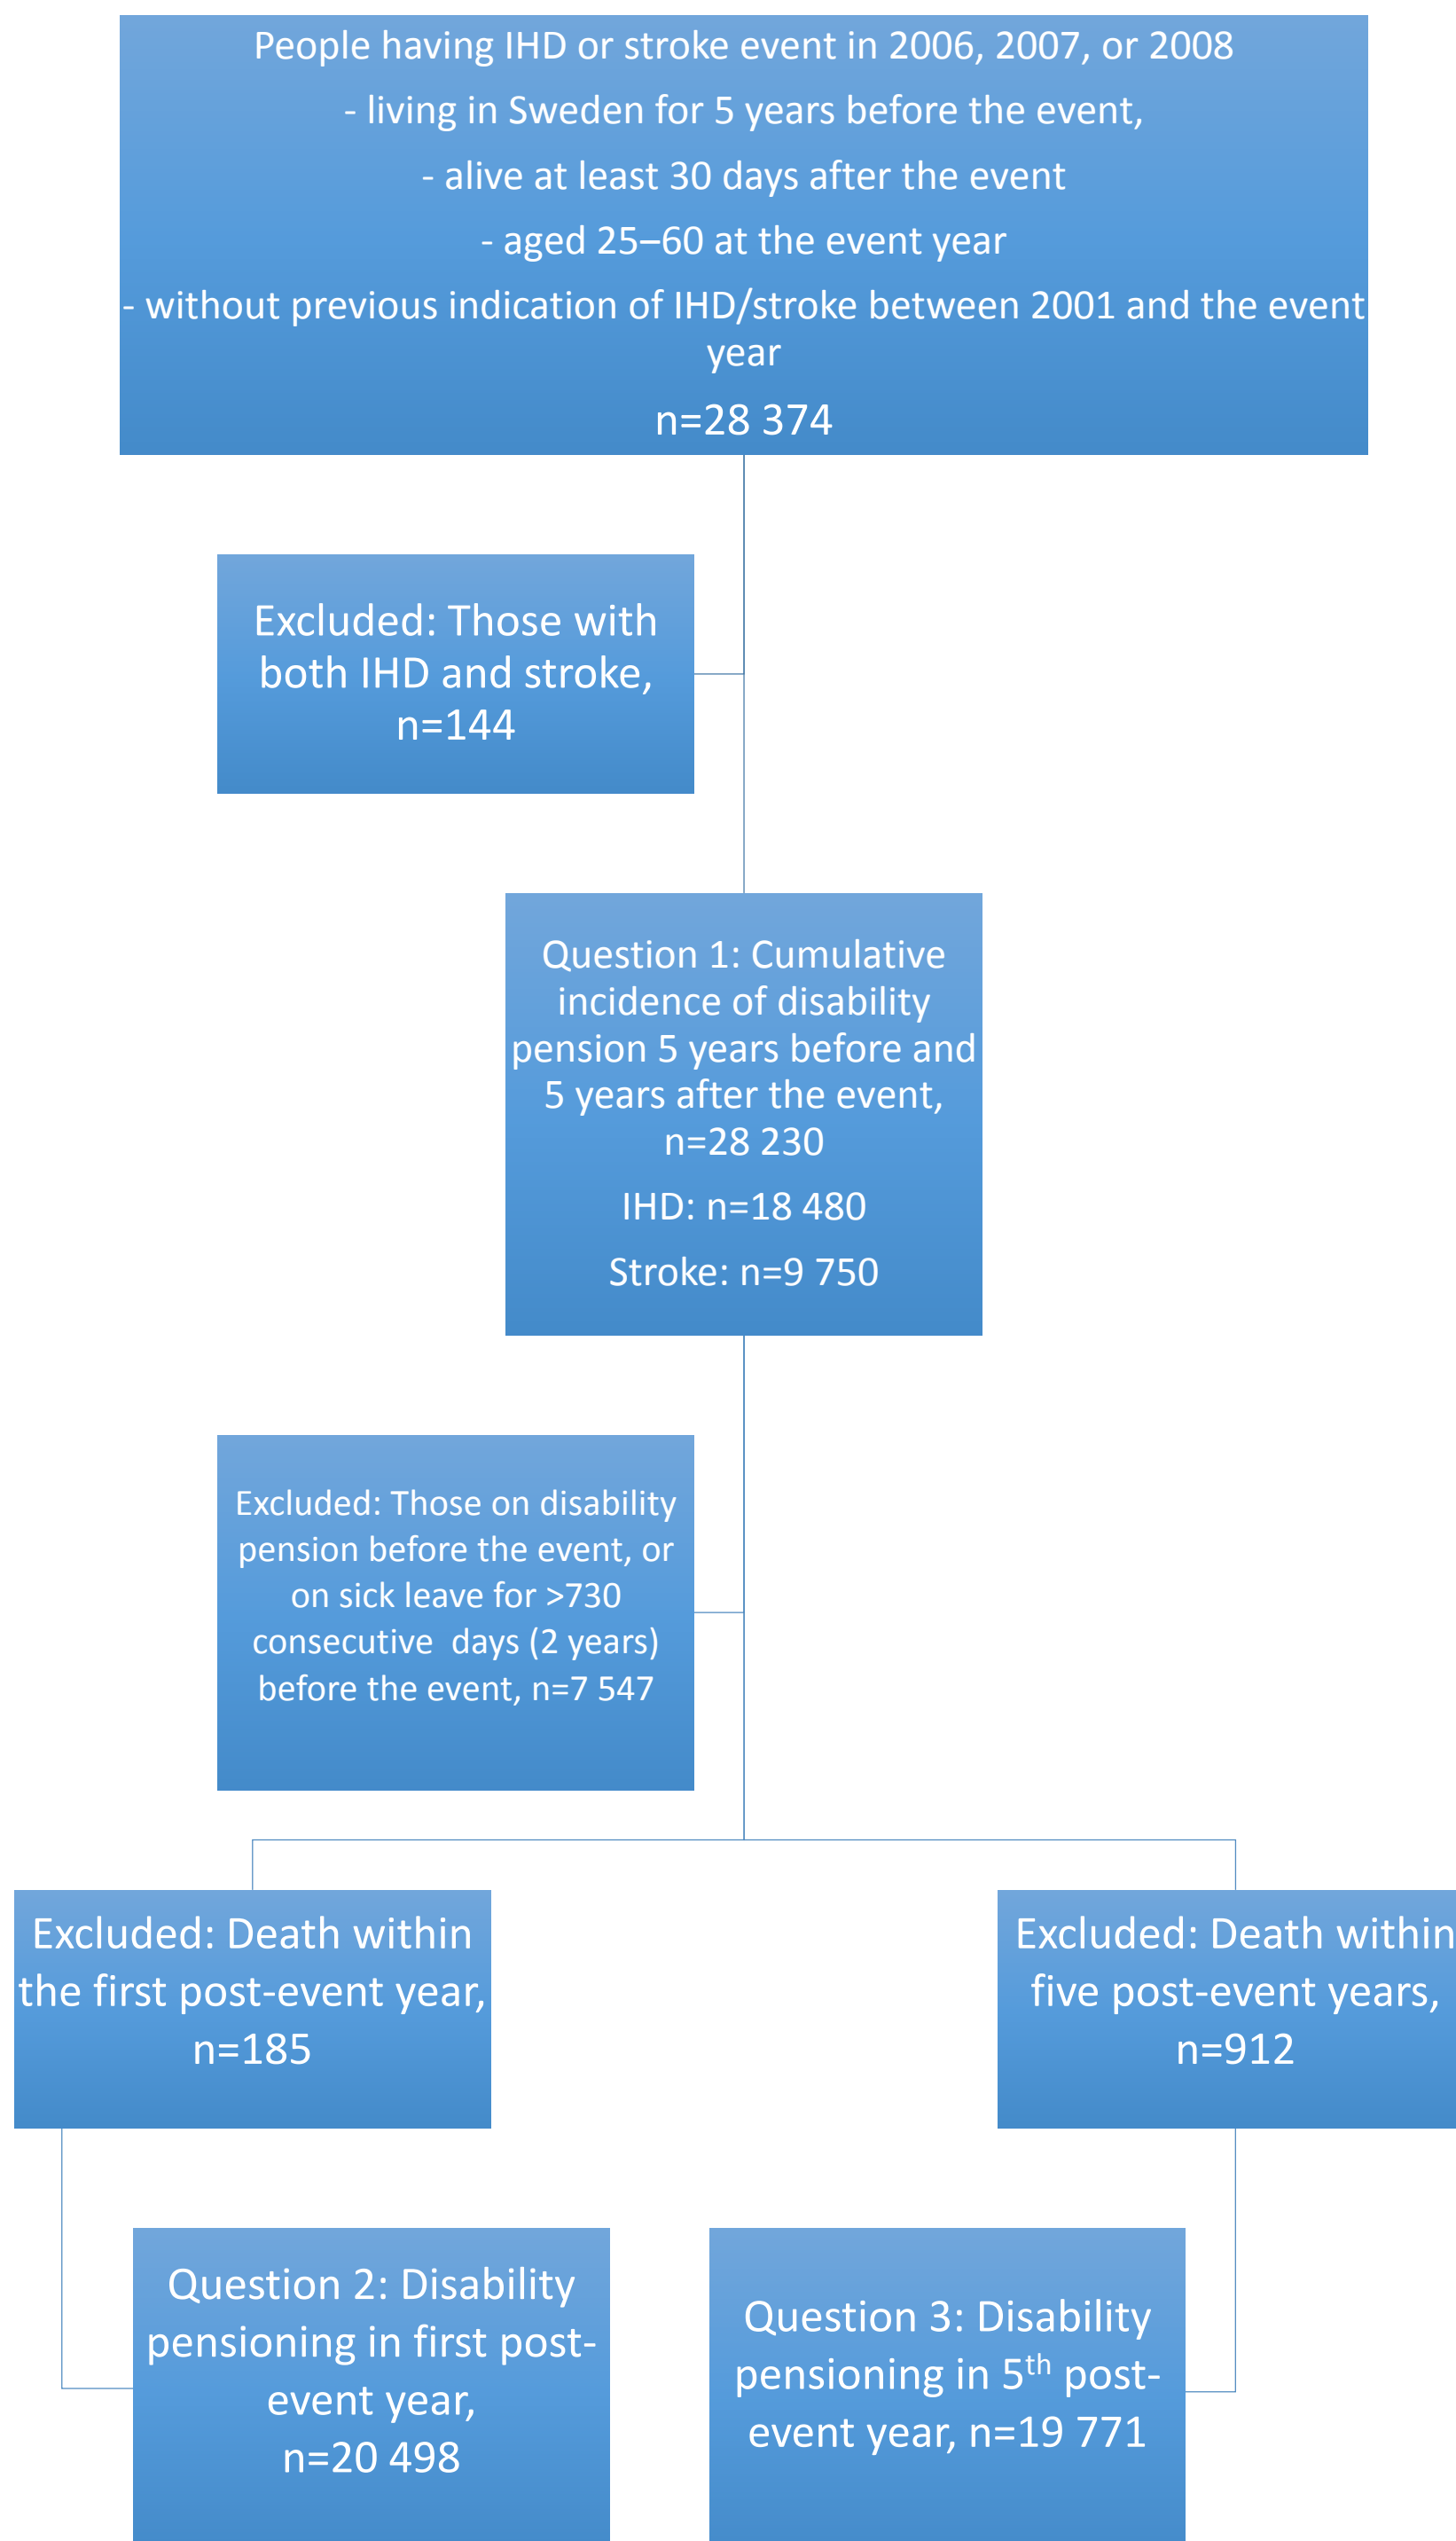

Supplementary Figure 1. Flow chart of study inclusion and exclusion criteria.

## STROBE Statement—checklist of items that should be included in reports of observational studies

|                              | Item No | Recommendation                                                                                                                                                                                                                                                                                                                                                                                                                                                         | Page                    |
|------------------------------|---------|------------------------------------------------------------------------------------------------------------------------------------------------------------------------------------------------------------------------------------------------------------------------------------------------------------------------------------------------------------------------------------------------------------------------------------------------------------------------|-------------------------|
| <b>Title and abstract</b>    | 1       | (a) Indicate the study's design with a commonly used term in the title or the abstract                                                                                                                                                                                                                                                                                                                                                                                 | 1                       |
|                              |         | (b) Provide in the abstract an informative and balanced summary of what was done and what was found                                                                                                                                                                                                                                                                                                                                                                    | 2                       |
| <b>Introduction</b>          |         |                                                                                                                                                                                                                                                                                                                                                                                                                                                                        |                         |
| Background/rationale         | 2       | Explain the scientific background and rationale for the investigation being reported                                                                                                                                                                                                                                                                                                                                                                                   | 4                       |
| Objectives                   | 3       | State specific objectives, including any prespecified hypotheses                                                                                                                                                                                                                                                                                                                                                                                                       | 4-5                     |
| <b>Methods</b>               |         |                                                                                                                                                                                                                                                                                                                                                                                                                                                                        |                         |
| Study design                 | 4       | Present key elements of study design early in the paper                                                                                                                                                                                                                                                                                                                                                                                                                | 6                       |
| Setting                      | 5       | Describe the setting, locations, and relevant dates, including periods of recruitment, exposure, follow-up, and data collection                                                                                                                                                                                                                                                                                                                                        | 6-7                     |
| Participants                 | 6       | (a) <i>Cohort study</i> —Give the eligibility criteria, and the sources and methods of selection of participants. Describe methods of follow-up<br><i>Case-control study</i> —Give the eligibility criteria, and the sources and methods of case ascertainment and control selection. Give the rationale for the choice of cases and controls<br><i>Cross-sectional study</i> —Give the eligibility criteria, and the sources and methods of selection of participants | 6-7                     |
|                              |         | (b) <i>Cohort study</i> —For matched studies, give matching criteria and number of exposed and unexposed<br><i>Case-control study</i> —For matched studies, give matching criteria and the number of controls per case                                                                                                                                                                                                                                                 |                         |
| Variables                    | 7       | Clearly define all outcomes, exposures, predictors, potential confounders, and effect modifiers. Give diagnostic criteria, if applicable                                                                                                                                                                                                                                                                                                                               | 7-8                     |
| Data sources/<br>measurement | 8*      | For each variable of interest, give sources of data and details of methods of assessment (measurement). Describe comparability of assessment methods if there is more than one group                                                                                                                                                                                                                                                                                   | 7-8                     |
| Bias                         | 9       | Describe any efforts to address potential sources of bias                                                                                                                                                                                                                                                                                                                                                                                                              | 6,7                     |
| Study size                   | 10      | Explain how the study size was arrived at                                                                                                                                                                                                                                                                                                                                                                                                                              | Supplementary<br>Fig 1. |
| Quantitative variables       | 11      | Explain how quantitative variables were handled in the analyses. If applicable, describe which groupings were chosen and why                                                                                                                                                                                                                                                                                                                                           | 7-8                     |
| Statistical methods          | 12      | (a) Describe all statistical methods, including those used to control for confounding                                                                                                                                                                                                                                                                                                                                                                                  | 8-9                     |
|                              |         | (b) Describe any methods used to examine subgroups and                                                                                                                                                                                                                                                                                                                                                                                                                 |                         |

|                   |     |                                                                                                                                                                                                              |                                 |
|-------------------|-----|--------------------------------------------------------------------------------------------------------------------------------------------------------------------------------------------------------------|---------------------------------|
|                   |     | interactions                                                                                                                                                                                                 |                                 |
|                   |     | (c) Explain how missing data were addressed                                                                                                                                                                  | no missing data                 |
|                   |     | (d) <i>Cohort study</i> —If applicable, explain how loss to follow-up was addressed                                                                                                                          | no loss to follow-up            |
|                   |     | <i>Case-control study</i> —If applicable, explain how matching of cases and controls was addressed                                                                                                           |                                 |
|                   |     | <i>Cross-sectional study</i> —If applicable, describe analytical methods taking account of sampling strategy                                                                                                 |                                 |
|                   |     | € Describe any sensitivity analyses                                                                                                                                                                          | 9                               |
| <b>Results</b>    |     |                                                                                                                                                                                                              |                                 |
| Participants      | 13* | (a) Report numbers of individuals at each stage of study—eg numbers potentially eligible, examined for eligibility, confirmed eligible, included in the study, completing follow-up, and analysed            | Supplementary Fig 1.            |
|                   |     | (b) Give reasons for non-participation at each stage                                                                                                                                                         | Supplementary Fig 1.            |
|                   |     | (c) Consider use of a flow diagram                                                                                                                                                                           | Supplementary Fig 1.            |
| Descriptive data  | 14* | (a) Give characteristics of study participants (eg demographic, clinical, social) and information on exposures and potential confounders                                                                     | Table 1                         |
|                   |     | (b) Indicate number of participants with missing data for each variable of interest                                                                                                                          | no missing data                 |
|                   |     | (c) <i>Cohort study</i> —Summarise follow-up time (eg, average and total amount)                                                                                                                             | Supplementary Fig 1.            |
| Outcome data      | 15* | <i>Cohort study</i> —Report numbers of outcome events or summary measures over time                                                                                                                          | Table 1                         |
|                   |     | <i>Case-control study</i> —Report numbers in each exposure category, or summary measures of exposure                                                                                                         |                                 |
|                   |     | <i>Cross-sectional study</i> —Report numbers of outcome events or summary measures                                                                                                                           |                                 |
| Main results      | 16  | (a) Give unadjusted estimates and, if applicable, confounder-adjusted estimates and their precision (eg, 95% confidence interval). Make clear which confounders were adjusted for and why they were included | Table 2                         |
|                   |     | (b) Report category boundaries when continuous variables were categorized                                                                                                                                    |                                 |
|                   |     | (c) If relevant, consider translating estimates of relative risk into absolute risk for a meaningful time period                                                                                             | Figure 1, Figure 2              |
| Other analyses    | 17  | Report other analyses done—eg analyses of subgroups and interactions, and sensitivity analyses                                                                                                               | Table 2, Supplementary Table 1. |
| <b>Discussion</b> |     |                                                                                                                                                                                                              |                                 |
| Key results       | 18  | Summarise key results with reference to study objectives                                                                                                                                                     | 19-20                           |
| Limitations       | 19  | Discuss limitations of the study, taking into account sources of potential bias or imprecision. Discuss both direction and magnitude of any potential bias                                                   | 22                              |

|   |                  |    |                                                                         |
|---|------------------|----|-------------------------------------------------------------------------|
| 1 |                  |    |                                                                         |
| 2 | Interpretation   | 20 | Give a cautious overall interpretation of results considering           |
| 3 |                  |    | objectives, limitations, multiplicity of analyses, results from similar |
| 4 |                  |    | studies, and other relevant evidence                                    |
| 5 |                  |    |                                                                         |
| 6 | Generalisability | 21 | Discuss the generalisability (external validity) of the study results   |
| 7 |                  |    |                                                                         |

---

#### Other information

---

|    |         |    |                                                                       |
|----|---------|----|-----------------------------------------------------------------------|
| 8  | Funding | 22 | Give the source of funding and the role of the funders for the        |
| 9  |         |    | present study and, if applicable, for the original study on which the |
| 10 |         |    | present article is based                                              |
| 11 |         |    |                                                                       |
| 12 |         |    |                                                                       |

\*Give information separately for cases and controls in case-control studies and, if applicable, for exposed and unexposed groups in cohort and cross-sectional studies.

**Note:** An Explanation and Elaboration article discusses each checklist item and gives methodological background and published examples of transparent reporting. The STROBE checklist is best used in conjunction with this article (freely available on the Web sites of PLoS Medicine at <http://www.plosmedicine.org/>, Annals of Internal Medicine at <http://www.annals.org/>, and Epidemiology at <http://www.epidem.com/>). Information on the STROBE Initiative is available at [www.strobe-statement.org](http://www.strobe-statement.org).

# BMJ Open

## Permanent work disability before and after ischemic heart disease or stroke event: A nationwide population-based cohort study in Sweden

|                                 |                                                                                                                                                                                                                                                                                                                                                                                                                                                                                                             |
|---------------------------------|-------------------------------------------------------------------------------------------------------------------------------------------------------------------------------------------------------------------------------------------------------------------------------------------------------------------------------------------------------------------------------------------------------------------------------------------------------------------------------------------------------------|
| Journal:                        | <i>BMJ Open</i>                                                                                                                                                                                                                                                                                                                                                                                                                                                                                             |
| Manuscript ID                   | bmjopen-2017-017910.R1                                                                                                                                                                                                                                                                                                                                                                                                                                                                                      |
| Article Type:                   | Research                                                                                                                                                                                                                                                                                                                                                                                                                                                                                                    |
| Date Submitted by the Author:   | 24-Jul-2017                                                                                                                                                                                                                                                                                                                                                                                                                                                                                                 |
| Complete List of Authors:       | Ervasti, Jenni; Finnish Institute of Occupational Health, Centre of Expertise for Work Organizations<br>Virtanen, Marianna; Finnish Institute of Occupational Health, Centre of Expertise for Work Organizations<br>Lallukka, Tea; Finnish Institute of Occupational Health,<br>Friberg, Emilie<br>Mittendorfer-Rutz, Ellenor; Karolinska Institutet, Clinical Neuroscience<br>Lundström, Erik; Karolinska Institutet Department of Clinical Neuroscience<br>Alexanderson, Kristina; Karolinska Institutet, |
| <b>Primary Subject Heading</b>: | Epidemiology                                                                                                                                                                                                                                                                                                                                                                                                                                                                                                |
| Secondary Subject Heading:      | Cardiovascular medicine, Occupational and environmental medicine, Public health                                                                                                                                                                                                                                                                                                                                                                                                                             |
| Keywords:                       | Ischaemic heart disease < CARDIOLOGY, Stroke < NEUROLOGY, EPIDEMIOLOGY, OCCUPATIONAL & INDUSTRIAL MEDICINE, sick leave, disability pension                                                                                                                                                                                                                                                                                                                                                                  |
|                                 |                                                                                                                                                                                                                                                                                                                                                                                                                                                                                                             |

SCHOLARONE™  
Manuscripts

1  
2  
3  
4  
5  
6 **Permanent work disability before and after ischemic heart disease or**  
7  
8 **stroke event: A nationwide population-based cohort study in Sweden**  
9  
10

11  
12  
13  
14 Jenni Ervasti<sup>a</sup>, Marianna Virtanen<sup>a</sup>, Tea Lallukka<sup>a,b</sup>, Emilie Friberg<sup>c</sup>, Ellenor Mittendorfer-  
15  
16 Rutz<sup>c</sup>, Erik Lundström<sup>d</sup>, Kristina Alexanderson<sup>c</sup>  
17  
18

19  
20  
21  
22 a Finnish Institute of Occupational Health, Helsinki, Finland  
23

24  
25 b Faculty of Medicine, University of Helsinki, Finland  
26

27  
28 c Division of Insurance Medicine, Department of Clinical Neuroscience, Karolinska  
29  
30 Institutet, SE-171 77 Stockholm, Sweden  
31

32  
33 d Division of Neurology, Department of Clinical Neuroscience, Karolinska Institutet,  
34  
35 Stockholm, Sweden  
36

37  
38  
39  
40 **Corresponding author:** Jenni Ervasti, Finnish Institute of Occupational Health, PB 40, FI-  
41  
42 00251 Helsinki, Finland, [jenni.ervasti@ttl.fi](mailto:jenni.ervasti@ttl.fi), tel. +35843825 5475  
43  
44  
45  
46  
47  
48  
49  
50  
51  
52  
53  
54  
55  
56  
57  
58  
59  
60



## ABSTRACT

**Objectives:** We examined the risk of disability pension before and after ischemic heart disease (IHD) or stroke event, the burden of stroke compared to IHD, and which factors predicted disability pension after either event.

**Design:** A population-based cohort study with follow-up five years before and after the event. Register data were analysed with general linear modelling with binary and Poisson distributions including interaction tests for event type (IHD/stroke).

**Setting and participants:** All people living in Sweden, aged 25–60 years at the first event year, who had been living in Sweden for five years before the event and had no indication of IHD or stroke prior to the index event in 2006–2008 were included, except for cases in which death occurred within 30 days of the event. People with both IHD and stroke were excluded, resulting in 18 480 cases of IHD (65%) and 9750 stroke cases (35%).

**Primary outcome measures:** Disability pension.

**Results:** Of those going to suffer IHD or stroke event, 25% were already on disability pension a year before the event. The adjusted odds ratio (OR) for disability pension at first post-event year was 2.64 fold (95% CI 2.25-3.11) for people with stroke compared to IHD. Economic inactivity predicted disability pension regardless of event type (OR=3.40; 95% CI 2.85-4.04). Comorbid mental disorder was associated with the greatest risk (OR=3.60; 95% CI 2.69-4.83) after an IHD event. Regarding stroke, medical procedure, a proxy for event severity, was the largest contributor (OR=2.27, 95% CI 1.43-3.60).

**Conclusions:** While IHD event was more common, stroke involved more permanent work disability. Demographic, socioeconomic, and comorbidity-related factors were associated

1  
2  
3 with disability pension both before and after the event. The results help occupational and  
4  
5 other healthcare professionals to identify vulnerable groups at risk for permanent labour  
6  
7 market exclusion after such an event.  
8  
9

10  
11  
12  
13 **Keywords:** Cardiovascular disease; Cohort studies; Disability pension; Ischemic heart  
14  
15 disease; Occupational Health; Sick-leave; Stroke  
16  
17

18  
19  
20  
21 **Strengths and limitations of this study:**  
22

- 23  
24  
25 • With large population-based cohort data with reliable register-based measures and no  
26  
27 loss to follow up, we provided information about how ischemic heart disease (IHD)  
28  
29 and stroke events were linked with risk of permanent work disability, i.e., disability  
30  
31 pension.  
32  
33  
34 • Compared to previous studies focusing on IHD, we had a longer follow-up time – five  
35  
36 years – both before and after the event.  
37  
38  
39 • We were able to include a large set of predictors of disability pension, including  
40  
41 sociodemographic factors, comorbid conditions, and medical procedure.  
42  
43  
44 • The results may help when planning preventive measures for permanent work  
45  
46 disability after IHD or stroke event.  
47  
48  
49 • As we were only able to include information that was available in administrative  
50  
51 registers, we had no data on quality and outcome of post-event care, individuals'  
52  
53 health behaviours, or workplace psychosocial factors.  
54  
55  
56  
57  
58  
59  
60

## INTRODUCTION

Worldwide, 11% of the total disease burden as measured with disability-adjusted life years, is attributed to ischemic heart disease (IHD) and stroke.[1] Due to improved treatment of both IHD and stroke contributing to declining mortality,[2] and because of the pressures of extended working careers, the proportion of working-age people with cardiovascular disease is likely to increase. While 53-73% of people suffering a cardiovascular event return to work,[3-6] significantly higher proportion leaves working life permanently during the years following a cardiovascular event than among people without such diagnosis.[7] In order to help people with this disease to continue working, it is important to study the risk factors leading to permanent work disability (i.e., disability pension) after a cardiovascular event.

Disease severity, comorbidity, female sex, higher age, and lower socioeconomic status have been found to predict disability pension after an IHD event.[7-12] However, we found no previous research that specifically examined the predictors of disability pension after a stroke event. Research on stroke has focused on return to work, which has been associated with a less serious disability, younger age, higher socioeconomic position, and less cardiovascular risk factors.[4-6] While IHD and stroke share several common risk factors, some discrepancies also point to differential pattern of predictors.[13] Previous studies have not examined whether differences exist between the predictors of disability pension after IHD and stroke events.

Our aim was to (a) determine the proportion and characteristics of people who suffered an IHD or stroke event at working age who were already on disability pension prior to the event; and (b) examine the medical (comorbidity, event severity) and non-medical

1  
2  
3 (demographic and socioeconomic) predictors of disability pension in the first post-event year,  
4  
5 including examining difference in IHD and stroke cases.  
6  
7

8 From a labour force policy perspective, it is important to determine whether the  
9  
10 predictors of disability pension shortly after the event are different from those that predict  
11  
12 disability pension in the longer run. Thus, as a sensitivity analysis, we studied the medical  
13  
14 and non-medical predictors of disability pension in the fifth post-event year and whether  
15  
16 there were differences between IHD and stroke cases.  
17  
18  
19  
20  
21  
22  
23  
24  
25  
26  
27  
28  
29  
30  
31  
32  
33  
34  
35  
36  
37  
38  
39  
40  
41  
42  
43  
44  
45  
46  
47  
48  
49  
50  
51  
52  
53  
54  
55  
56  
57  
58  
59  
60

## METHODS

### Study design

The population-based longitudinal cohort study was conducted based on register data obtained from three Swedish authorities and linked using the personal identity number assigned to all residents in Sweden. The following registers were used:

1. Statistics Sweden: Longitudinal Integration Database for Health Insurance and Labour Market Studies (LISA) on sex, age, education, family situation, place of birth, type of living area, and labour market activity
2. National Board of Health and Welfare: diagnosis-specific data on hospitalizations and specialized outpatient care (coded according to the International Classification of Diseases (ICD-10)[14]); medical procedures; cancer register; date of death
3. National Social Insurance Agency: Annual sickness absence data (pre-event) and disability pension data.

Our study cohort consisted of all people living in Sweden, who at the event year were aged 25 to 60 years, had been living in Sweden for five years before the event, and had no indication of cardiovascular events in the registers between 2001 and the event year. First event dates in 2006, 2007, and 2008 were included, except for cases in which death occurred within 30 days of the event. This resulted in a sample of 28 374 cases. The data on cumulative disability pension were gathered for five years prior to the event date, and five years after the event. People with both IHD and stroke were excluded (n=144), resulting in 18 480 cases of IHD and 9750 stroke cases.

1  
2  
3 In prospective analyses on the predictors of disability pension in the first and  
4 fifth post-event year, individuals already on disability pension at the time of the event and  
5 people with more than 730 sickness absence days (two years) prior to the event were  
6 excluded (n=7547), resulting in a cohort of 20 683 individuals. Those who died were  
7 excluded from the death year onwards. This resulted in a final sample of 20 498 individuals  
8 for analyses of the onset of disability pension during the first post-event year (185 individuals  
9 died during the first year), and 19 771 for analysis of the onset of disability pension in the  
10 fifth post-event year (912 individuals died during the five subsequent years). Supplementary  
11 Figure 1 shows a flow chart of inclusion and exclusion criteria regarding each of the study  
12 questions.  
13  
14  
15  
16  
17  
18  
19  
20  
21  
22  
23  
24  
25  
26  
27

## 28 **Measures**

29  
30  
31  
32  
33  
34 An IHD event was based on hospitalization for myocardial infarction or other IHD, excluding  
35 angina pectoris (i.e., codes I21–I25 were included). A stroke event was based on  
36 hospitalization for stroke (ICD-10 codes I60, I61, I63, and I64).  
37  
38  
39  
40

41  
42 For the outcome, annual data on disability pension days were gathered. In  
43 Sweden, all individuals aged 30 to 64, including people with no previous income, can be  
44 granted disability pension if their work capacity is permanently reduced owing to disease or  
45 injury. Individuals aged 19 to 29 can be granted temporary disability pension in cases of such  
46 reduced work capacity or in order to complete compulsory education.  
47  
48  
49  
50  
51

52  
53 The predictors of disability pension, all measured in the event year, were age,  
54 sex, education, economic inactivity, type of living area, family situation, birth country,  
55 mental disorder, cancer, diabetes, and medical procedure during the event. Age was  
56  
57  
58  
59  
60

1  
2  
3 dichotomized as “50 years or less” and “more than 50 years”. Education was classified as  
4  
5 “low” (<10 years), “intermediate” (10–12 years = high school), or “high” (>12 years =  
6  
7 college or university). Economic activity was coded as “economically active” (in paid work)  
8  
9 or “economically inactive” (not in paid work, including for example the unemployed,  
10  
11 students, and those on parental leave). Family situation was classified as  
12  
13 “married/cohabiting”, “not married/cohabiting without children” (i.e., single), or “not  
14  
15 married/cohabiting with children” (i.e., single parent). Birth country was dichotomized into  
16  
17 “Sweden” or “country other than Sweden”. Type of living area was classified as “large city”,  
18  
19 “medium-sized town”, or “small town/village”.  
20  
21

22  
23  
24 Cancer (ICD-10 codes C00-D48) was based on information in the cancer  
25  
26 register, and mental disorders (F00-F99) and diabetes (E10-E14) were based on information  
27  
28 from the patient register (inpatient and specialized outpatient care). All the diseases were  
29  
30 coded “yes” or “no”  
31  
32

33  
34 Medical procedures at T-1 (year prior to the event) or T1 (year after the event)  
35  
36 included coronary artery bypass graft, percutaneous coronary intervention, other coronary  
37  
38 distension procedure, or intravenous intracranial procedure. People who had undergone at  
39  
40 least one such procedure were coded “yes” and those without “no”.  
41  
42  
43  
44

## 45 46 **Statistical analysis** 47 48 49 50

51  
52 The cumulative incidence trend in disability pension five years before and five years after the  
53  
54 event was calculated with frequencies (percentage of individuals on disability pension each  
55  
56 year, with 95% confidence intervals [CI]). Between-group differences in disability pension  
57  
58 were tested with Chi<sup>2</sup> tests. To assess the risk of new disability pension during the first year  
59  
60

1  
2  
3 after the event (outcome incidence 3%), we used generalized linear model with binary  
4  
5 distribution and logit link function, which produced odds ratios (OR) with 95% CI. To  
6  
7 examine the differences between the predictors of disability pension for IHD and stroke  
8  
9 cases, we tested the effect modification (interaction) of event type (IHD/stroke) and each of  
10  
11 the predictors. When a statistically significant ( $p < 0.05$ ) interaction effect was observed, we  
12  
13 performed stratified subgroup analyses. The relative and absolute differences in disability  
14  
15 pensioning by these subgroups were illustrated with least square means adjusted for all  
16  
17 predictor variables. These adjusted means were produced using Poisson distribution due to  
18  
19 conversion problems with binary logistic models.  
20  
21

22  
23 In sensitivity analyses, we used generalized linear model with Poisson  
24  
25 distribution and log link function to produce relative risks (RR) with 95% CI to estimate  
26  
27 predictors of disability pension by the fifth year after the cardiovascular event (outcome  
28  
29 incidence 18%). Different regression methods were used for the fifth and the first post-event  
30  
31 year since OR is not a good approximation of risk ratio when outcome prevalence is above  
32  
33 10%. [15-17] SAS 9.4 was used for all analyses.  
34  
35  
36  
37  
38  
39  
40  
41  
42  
43  
44  
45  
46  
47  
48  
49  
50  
51  
52  
53  
54  
55  
56  
57  
58  
59  
60



## RESULTS

### Cumulative incidence of disability pension

Figure 1 illustrates the cumulative incidence of disability pension five years before and five years after a cardiovascular event of IHD or stroke: The cumulative incidence of disability pension was similar (up to 25%) until the event for both IHD and stroke. Thus, about a quarter of working-age people who had suffered incident IHD or a stroke were already on disability pension before the event. The highest prevalence of pre-event disability pension was observed among women (37%), people who were economically inactive (69%), had low education (36%), were born outside Sweden (35%), and had comorbid cancer (36%), mental disorder (58%), or diabetes (48%) at the event year (Table 1).

After the event, the cumulative incidence of disability pension was substantially higher (reaching 50%) among people who suffered a stroke event than among those who suffered an IHD event (slightly above 30%) (Figure 1). Similar characteristics were associated with first and fifth post-event year disability pensioning, as observed before the event (Table 1.)

Table 1. Characteristics of study participants by disability pension before and after a cardiovascular (ischemic heart disease or stroke) event

| Characteristics |                    | Pre-event disability pension |                   |                   | Disability pension in first post-event year |                   |                  | Disability pension in fifth post-event year |                   |                   |
|-----------------|--------------------|------------------------------|-------------------|-------------------|---------------------------------------------|-------------------|------------------|---------------------------------------------|-------------------|-------------------|
|                 |                    | n                            | No (n=20683)<br>% | Yes (n=7547)<br>% | n                                           | No (n=19802)<br>% | Yes (n=696)<br>% | n                                           | No (n=16317)<br>% | Yes (n=3454)<br>% |
| Sex:            | Men                | 19713                        | 78                | 22                | 15222                                       | 97                | 3                | 14661                                       | 85                | 15                |
|                 | Women              | 8517                         | 63                | 37                | 5276                                        | 96                | 4                | 5110                                        | 74                | 26                |
| Age:            | ≤50 years          | 8332                         | 79                | 21                | 6575                                        | 97                | 3                | 6412                                        | 85                | 15                |
|                 | >50 years          | 19898                        | 71                | 29                | 13923                                       | 96                | 4                | 13359                                       | 81                | 19                |
| Education:      | Low                | 7854                         | 64                | 36                | 4981                                        | 95                | 5                | 4774                                        | 80                | 20                |
|                 | Intermediate       | 14095                        | 73                | 27                | 10274                                       | 97                | 3                | 9902                                        | 83                | 17                |
|                 | High               | 6281                         | 84                | 16                | 5243                                        | 97                | 3                | 5095                                        | 84                | 16                |
| Economically:   | Active             | 20076                        | 91                | 9                 | 18045                                       | 97                | 3                | 17460                                       | 85                | 15                |
|                 | Inactive           | 8154                         | 31                | 69                | 2453                                        | 90                | 10               | 2366                                        | 75                | 25                |
| Family          | Married/cohab.     | 16121                        | 78                | 22                | 12513                                       | 97                | 3                | 12181                                       | 84                | 16                |
|                 | Single, no childr. | 10310                        | 66                | 34                | 6693                                        | 96                | 4                | 6339                                        | 81                | 19                |
|                 | Single, childr.    | 1799                         | 72                | 28                | 1292                                        | 97                | 3                | 1251                                        | 80                | 20                |
| Birth country:  | Sweden             | 23126                        | 75                | 25                | 17198                                       | 97                | 3                | 16582                                       | 83                | 17                |
|                 | Other              | 5104                         | 65                | 35                | 3300                                        | 95                | 5                | 3189                                        | 80                | 20                |
| Living area:    | Large city         | 9163                         | 75                | 25                | 6776                                        | 97                | 3                | 6527                                        | 84                | 16                |
|                 | Medium-size        | 10019                        | 73                | 27                | 7212                                        | 97                | 3                | 6979                                        | 82                | 18                |

|                  |            |       |    |    |       |    |    |       |    |    |
|------------------|------------|-------|----|----|-------|----|----|-------|----|----|
|                  | Small town | 9048  | 73 | 27 | 6510  | 96 | 4  | 6265  | 82 | 18 |
| Cancer:          | Yes        | 847   | 64 | 36 | 482   | 93 | 7  | 382   | 75 | 25 |
|                  | No         | 27383 | 74 | 26 | 20016 | 97 | 3  | 19389 | 83 | 17 |
| Mental disorder: | Yes        | 3286  | 42 | 58 | 1352  | 90 | 10 | 1236  | 71 | 29 |
|                  | No         | 24944 | 77 | 23 | 19146 | 97 | 3  | 18535 | 83 | 17 |
| Diabetes:        | Yes        | 2887  | 52 | 48 | 1490  | 94 | 6  | 1381  | 75 | 25 |
|                  | No         | 25343 | 76 | 24 | 19008 | 97 | 3  | 18390 | 83 | 17 |
| Procedure*:      | Yes        | 3077  | 78 | 22 | 2379  | 97 | 3  | 2318  | 85 | 15 |
|                  | No         | 25153 | 73 | 27 | 18119 | 97 | 3  | 17453 | 82 | 18 |
| Type of event:   | IHD        | 18480 | 73 | 27 | 13450 | 98 | 2  | 13028 | 91 | 9  |
|                  | Stroke     | 9750  | 73 | 27 | 7048  | 94 | 6  | 6743  | 67 | 33 |

\*Medical procedure=coronary artery bypass graft, percutaneous coronary intervention, other coronary distension procedure, or intravenous intracranial procedure

Note. All p-values for difference between groups (Chi<sup>2</sup>) were <0.01 except for 'pre-event disability pension and type of event', 'disability pension during the event year and living area', and 'disability pension during the event year and medical procedure.

### New-onset disability pension in first post-event year

Table 2 presents the both the unadjusted and adjusted results on factors associated with the risk of disability pension during the first post-event year. After adjustment for sociodemographic factors, comorbid conditions, and medical procedures, stroke patients were at a higher risk of disability pension during the first post-event year than people who had suffered an IHD event (OR=2.79; 95% CI 2.37-3.29). Among both IHD and stroke patients, older age (OR=1.66; 95% CI 1.38-1.98), low education (OR=1.58; 95% CI 1.27-1.97), economic inactivity (OR=3.40; 95% CI 2.85-4.04), being single without children (OR=1.25; 95% CI 1.06-1.48), birth country other than Sweden (OR=1.27; 95% CI 1.04-1.55), living in small towns (OR=1.32; 95% CI 1.08-1.61), and comorbid cancer (OR=1.85; 95% CI 1.27-2.69) were associated with higher odds of disability pension in the first post-event year.

Table 2. Predictors of disability pension during first year after cardiovascular event. In case of significant interaction ( $p < 0.05$ ), analyses are stratified by event type.

|               |                    | IHD or stroke |           |           |           | P for interaction with event type (IHD/stroke) | IHD       |           | Stroke    |           |
|---------------|--------------------|---------------|-----------|-----------|-----------|------------------------------------------------|-----------|-----------|-----------|-----------|
|               |                    | Crude OR      | 95% CI    | OR*       | 95% CI    |                                                | OR†       | 95% CI    | OR†       | 95% CI    |
| Age:          | ≤50 years          | 1 (=Ref.)     |           | 1 (=Ref.) |           | 0.26                                           |           |           |           |           |
|               | >50 years          | 1.35          | 1.13-1.60 | 1.66      | 1.38-1.98 |                                                |           |           |           |           |
| Sex:          | Men                | 1 (=Ref.)     |           | 1 (=Ref.) |           | 0.03                                           | 1 (=Ref.) |           | 1 (=Ref.) |           |
|               | Women              | 1.48          | 1.26-1.74 | 1.34      | 1.13-1.59 |                                                | 1.62      | 1.25-2.11 | 1.12      | 0.90-1.39 |
| Education:    | High               | 1 (=Ref.)     |           | 1 (=Ref.) |           | 0.57                                           |           |           |           |           |
|               | Intermediate       | 1.19          | 0.97-1.45 | 1.10      | 0.89-1.35 |                                                |           |           |           |           |
|               | Low                | 1.86          | 1.51-2.31 | 1.58      | 1.27-1.97 |                                                |           |           |           |           |
| Economically: | Active             | 1 (=Ref.)     |           | 1 (=Ref.) |           | 0.14                                           |           |           |           |           |
|               | Inactive           | 4.15          | 3.53-4.89 | 3.40      | 2.85-4.04 |                                                |           |           |           |           |
| Family        | Married/cohab.     | 1 (=Ref.)     |           | 1 (=Ref.) |           | 0.82                                           |           |           |           |           |
|               | Single, no childr. | 1.56          | 1.33-1.83 | 1.25      | 1.06-     |                                                |           |           |           |           |

|                  |                 |           |           |           |           |       |           |           |                |
|------------------|-----------------|-----------|-----------|-----------|-----------|-------|-----------|-----------|----------------|
|                  |                 |           |           |           | 1.48      |       |           |           |                |
|                  | Single, childr. | 1.20      | 0.87-1.65 | 0.94      | 0.67-1.31 |       |           |           |                |
| Birth country:   | Sweden          | 1 (=Ref.) |           | 1 (=Ref.) |           | 0.51  |           |           |                |
|                  | Other           | 1.52      | 1.26-1.82 | 1.27      | 1.04-1.55 |       |           |           |                |
| Living area:     | Large city      | 1 (=Ref.) |           | 1 (=Ref.) |           | 0.14  |           |           |                |
|                  | Medium-size     | 1.03      | 0.85-1.24 | 1.16      | 0.96-1.41 |       |           |           |                |
|                  | Small town      | 1.13      | 0.93-1.35 | 1.32      | 1.08-1.61 |       |           |           |                |
| Cancer:          | Yes             | 1 (=Ref.) |           | 1 (=Ref.) |           | 0.38  |           |           |                |
|                  | No              | 2.15      | 1.49-3.08 | 1.85      | 1.27-2.69 |       |           |           |                |
| Mental disorder: | Yes             | 1 (=Ref.) |           | 1 (=Ref.) |           | 0.006 | 1 (=Ref.) | 1 (=Ref.) |                |
|                  | No              | 3.46      | 2.83-4.22 | 2.54      | 2.05-3.14 |       | 3.60      | 2.69-4.83 | 1.90 1.41-2.55 |
| Diabetes:        | Yes             | 1 (=Ref.) |           | 1 (=Ref.) |           | 0.02  | 1 (=Ref.) | 1 (=Ref.) |                |
|                  | No              | 2.01      | 1.60-2.51 | 1.98      | 1.56-2.51 |       | 2.49      | 1.85-3.34 | 1.40 0.94-2.08 |
| Procedure‡:      | Yes             | 1 (=Ref.) |           | 1 (=Ref.) |           | 0.02  | 1 (=Ref.) | 1 (=Ref.) |                |
|                  | No              | 0.81      | 0.62-1.04 | 1.12      | 0.85-1.46 |       | 0.88      | 0.64-1.22 | 2.13 1.33-3.42 |
| Type of event:   | IHD             | 1 (=Ref.) |           | 1 (=Ref.) |           |       |           |           |                |
|                  | Stroke          | 2.64      | 2.27-3.08 | 2.79      | 2.37-     |       |           |           |                |

---

3.29

---

\* Multivariable model; all variables are entered simultaneously into the model

† Estimates are adjusted for all other variables

‡ Medical procedure =coronary artery bypass graft, percutaneous coronary intervention, other coronary distension procedure, or intravenous intracranial procedure

### Differences between IHD and stroke

The following interactions with event type were significant: sex, mental disorder, diabetes, and medical procedure. Women who had suffered an IHD event had 1.62 (95% CI 1.25-2.11) times higher odds of disability pension in the first post-event year than male IHD patients, whereas sex was not associated with disability pension among stroke patients. Among IHD cases, mental disorder was associated with 3.60 (95% CI 2.69-4.83) times higher odds of disability pension during the first post-event year compared with people without a mental disorder, whereas the corresponding odds ratio among stroke cases was 1.90 (95% CI 1.41-2.55). Comorbid diabetes was associated with 2.49 (95% CI 1.85-3.34) times higher odds of disability pension, while it was not associated with the risk of disability pension among people who had suffered a stroke. Among stroke cases, having undergone a medical procedure was associated with 2.13 (95% CI 1.33-3.42) times higher odds of disability pension in the first year after the event than among those who did not receive such procedure (Table 2.) These interactions, and absolute differences between IHD and stroke cases, are further illustrated in Figure 2, where we present percentages of those who ended up on disability pension adjusted for other predictor variables.

### Sensitivity analysis: Disability pension in fifth post-event year

Supplementary Table 1 presents the results regarding the factors associated with the risk of disability pension in the fifth post-event year after an IHD or stroke event. The main effects corresponded to those in first post-event year, but effect modification by event type was observed more often, indicating larger differences between IHD and stroke regarding



1  
2  
3 disability pension in the fifth post-year. Interaction terms observed at first post-year remained  
4  
5 statistically significant, but also several other interactions emerged. Those with less  
6  
7 education, economically inactive, and who were born outside of Sweden were at a higher risk  
8  
9 of disability pension, especially among the IHD cases.  
10  
11  
12  
13  
14  
15  
16  
17  
18  
19  
20  
21  
22  
23  
24  
25  
26  
27  
28  
29  
30  
31  
32  
33  
34  
35  
36  
37  
38  
39  
40  
41  
42  
43  
44  
45  
46  
47  
48  
49  
50  
51  
52  
53  
54  
55  
56  
57  
58  
59  
60

## DISCUSSION

In this population-based longitudinal cohort study of people of working ages in Sweden who had a new IHD or stroke event, we found that the incidence of disability pension was similar five years before the first IHD or stroke event. About 25% of the cohort were already on disability pension one year prior to the event, with significant overrepresentation of socioeconomically disadvantaged. This corresponds to previous studies which have reported pre-event disability pension prevalence of 22–29%. [3, 18-20] We showed that similar sociodemographic characteristics and pre-existing comorbid conditions were associated with pre-event and post-event disability pension.

People who had suffered a stroke had a substantially higher incidence of disability pension after the event (up to 50% during the five subsequent years) than people who had suffered an IHD event (up to 30%). Thus, although the incidence of an IHD event (18 480 cases in three years) was more common than the incidence of stroke (9750 cases in three years), the disability burden of stroke was greater than that of IHD.

Female sex, older age, lower education, economic inactivity, immigrant status, living in rural areas, and having comorbid conditions were all risk factors for disability pension after cardiovascular events, which corresponds to previous studies. [4, 5, 7, 9-12, 21]. The risk of disability pension after the event was higher among women than among men with IHD, but we observed no sex difference regarding stroke. Other research has reported significantly better long-term prognosis among women, [22] but no sex difference in mortality due to stroke. [23] Thus, the higher risk of disability pension after an IHD event among women may reflect women's higher probability of disability pension in general, [24] or may

1  
2  
3 be related to men's higher risk of cardiovascular mortality before disability pension is  
4  
5 granted.  
6  
7

8           As comorbid conditions contributed to exit to disability pension, it is possible  
9  
10 that part of these disability pensions were due to diagnoses other than cardiovascular  
11  
12 diseases. However, as the incidence of disability pension increased markedly after the  
13  
14 cardiovascular event, it is unlikely that comorbid conditions can explain all disability  
15  
16 pensions. Having had medical procedure related to the event was associated with disability  
17  
18 pension shortly after a stroke event. Medical procedure can be viewed as a proxy for the  
19  
20 severity of the event. Thus, risk groups for disability pension shortly after a stroke are those  
21  
22 who suffer a more severe event, which corresponds to previous results regarding return to  
23  
24 work.[4, 5]  
25  
26  
27

28           Although the relative difference in the risk of disability pension between those  
29  
30 with and without comorbid mental disorder and diabetes was larger for IHD cases than for  
31  
32 stroke cases, the highest absolute risk was found among those who had suffered a stroke and  
33  
34 had mental disorder or diabetes. Mental disorders, particularly depression, associated with an  
35  
36 IHD or stroke event might decrease work capacity by reducing functional capacity, and by  
37  
38 preventing the patient from participating in physical rehabilitation and cognitive therapies,  
39  
40 adhering to medical procedures, or making the necessary lifestyle changes needed to achieve  
41  
42 work capacity after IHD or a stroke.[25] Diabetes has been associated with excess risk of  
43  
44 death following myocardial infarction.[26]  
45  
46  
47  
48

49           In Sweden, people can be granted disability pension even without a history of  
50  
51 sick leave. However, even if it is rather likely that the individual will not return to work after,  
52  
53 e.g., a severe stroke, the patient or the relatives seldom apply for disability pension as the  
54  
55 benefit is usually lower than that for sick leave. The main reason for applying for disability  
56  
57  
58  
59  
60

1  
2  
3 pension immediately after the disability event is that one cannot get sickness absence benefits  
4  
5 (not having had income from work or unemployment benefit). Apart from certain specific  
6  
7 exceptions (e.g., ongoing treatment), one cannot be on sick leave for more than 365  
8  
9 consecutive days. Thus, people who were granted disability pension during the first post-  
10  
11 event year were possibly in a poorer labour market position, which prevented them from  
12  
13 applying for sickness absence benefits. This corresponds to our findings, since economic  
14  
15 inactivity was the strongest predictor of disability pension in the first post-event year  
16  
17 regardless of event type. Other indicators of poorer labour market position, such as low  
18  
19 education and birth country other than Sweden, were also predictive of fast exit to disability  
20  
21 pension.  
22  
23

24  
25  
26 Socioeconomic background and comorbid conditions explained the risk of  
27  
28 disability pension five years after the event to a greater extent among IHD than stroke cases.  
29  
30 This is noteworthy, since poorer labour market position and not fulfilling the criteria for  
31  
32 entitlement to sickness absence benefits cannot explain disability pension in the fifth post-  
33  
34 event year. The often higher severity of stroke compared to IHD may explain this difference;  
35  
36 after an IHD event, the probability of recovering to relatively good work capacity may be  
37  
38 higher. However, the observed differences in this recovery seem to relate to socioeconomic  
39  
40 characteristics and resources; the background factors may affect people's recovery and  
41  
42 rehabilitation.[27] Stroke, often a more disabling cardiovascular event, may more totally  
43  
44 reduce work capacity, and hence we found smaller individual differences. However, a  
45  
46 socioeconomic gradient has also been observed in short- and long-term outcomes after a  
47  
48 stroke.[28]  
49  
50  
51  
52

53 The major strength of this study was its large population-based cohort data with  
54  
55 reliable register-based measures of high coverage and specificity,[29] and no loss to follow  
56  
57 up. Compared to previous studies, we also had a longer follow-up – five years – both before  
58  
59  
60

1  
2  
3 and after the event. We were able to include a large set of predictors of disability pension,  
4  
5 including sociodemographic factors, comorbid conditions, and medical procedure.  
6  
7

8           The register data also have some limitations: we were only able to include  
9  
10 information that was available in administrative registers. This meant that we had no  
11  
12 information on quality and outcome of post-event care, individuals' health behaviours or  
13  
14 workplace psychosocial factors, which are typically collected in surveys, and have previously  
15  
16 been linked to disability pension in general populations.[30] However, a recent study among  
17  
18 Finnish public sector employees demonstrated that the contribution of health behaviours and  
19  
20 workplace psychosocial factors to the risk of disability pension was relatively small  
21  
22 compared to the contribution of comorbidity, especially mental comorbidity.[7] Regarding  
23  
24 post-event care, men were more likely to enrol in disease management program than women  
25  
26 after coronary heart disease in Germany.[31] We also did not have direct measure of event  
27  
28 severity, but used medical procedure as a proxy measure. In future studies, also recurrent  
29  
30 events could be included. Finally, the high employment frequency in higher ages and among  
31  
32 women in Sweden as well as the universal coverage with relatively high benefit levels might  
33  
34 limit the generalizability of the results.[32]  
35  
36  
37  
38  
39  
40  
41  
42

### 43 Conclusions

44  
45  
46  
47

48 Our results quantify and emphasize the burden of IHD and stroke to the labour market, and  
49  
50 can help occupational and other healthcare professionals to identify vulnerable groups at risk  
51  
52 for permanent exclusion from labour market after such an event. While IHD event was more  
53  
54 common, stroke caused more permanent work disability. As regards IHD, non-medical risk  
55  
56 factors contributed to the risk of disability pension, whereas medical factors contributed to  
57  
58  
59  
60

1  
2  
3  
4  
5  
6  
7  
8  
9  
10  
11  
12  
13  
14  
15  
16  
17  
18  
19  
20  
21  
22  
23  
24  
25  
26  
27  
28  
29  
30  
31  
32  
33  
34  
35  
36  
37  
38  
39  
40  
41  
42  
43  
44  
45  
46  
47  
48  
49  
50  
51  
52  
53  
54  
55  
56  
57  
58  
59  
60

the risk of disability pension after stroke. This knowledge may be beneficial when planning interventions to prevent permanent work disability after either event.

For peer review only

1  
2  
3 **Contributors:** JE, MV, TL, EMR, and KA contributed to conception and design. JE analysed  
4  
5 the data and drafted the manuscript. All authors contributed either to analysis, interpretation  
6  
7 or acquisition of the data, and critically revised the manuscript. All gave final approval and  
8  
9 agree to be accountable for all aspects ensuring integrity and accuracy.  
10

11  
12 **Funding:** This study was supported by the Swedish Research Council for Health, Working  
13  
14 Life and Welfare. JE, MV, and TL were supported by the Academy of Finland (projects  
15  
16 258598, 292824, 287488). The funding organizations had no role in the study design, data  
17  
18 collection, analysis, interpretation of the data, writing the report, or in the decision to submit  
19  
20 the paper.  
21  
22

23  
24 **Competing interest:** None declared.  
25  
26

27 **Ethics approval:** Ethical approval was obtained from the Regional Ethical Review Board,  
28  
29 Stockholm, Sweden.  
30  
31

32 **Data sharing statement:** No additional data available.  
33  
34  
35  
36  
37  
38  
39  
40  
41  
42  
43  
44  
45  
46  
47  
48  
49  
50  
51  
52  
53  
54  
55  
56  
57  
58  
59  
60

## REFERENCES

- 1 GBD Compare Data Visualization. Seattle, WA: Institute for Health  
Metrics and Evaluation (IHME), University of Washington 2016.
- 2 Schmidt M, Jacobsen JB, Lash TL, *et al.* 25 year trends in first time  
hospitalisation for acute myocardial infarction, subsequent short and long term mortality, and  
the prognostic impact of sex and comorbidity: a Danish nationwide cohort study. *BMJ*  
(*Clinical research ed*) 2012;**344**:e356.
- 3 Hamalainen H, Maki J, Virta L, *et al.* Return to work after first myocardial  
infarction in 1991-1996 in Finland. *Eur J Public Health* 2004;**14**:350-3.
- 4 Peters GO, Buni SG, Oyeyemi AY, *et al.* Determinants of return to work  
among Nigerian stroke survivors. *Disability and rehabilitation* 2013;**35**:455-9.
- 5 Bonner B, Pillai R, Sarma PS, *et al.* Factors predictive of return to work  
after stroke in patients with mild-moderate disability in India. *European journal of neurology*  
2016;**23**:548-53.
- 6 Catalina-Romero C, Ruilope LM, Sanchez-Chaparro MA, *et al.* Factors  
influencing return-to-work after cerebrovascular disease: the importance of previous  
cardiovascular risk. *European journal of preventive cardiology* 2015;**22**:1220-7.
- 7 Ervasti J, Kivimaki M, Pentti J, *et al.* Health- and work-related predictors of  
work disability among employees with a cardiometabolic disease--A cohort study. *J*  
*Psychosom Res* 2016;**82**:41-7.
- 8 Lundbom J, Myhre HO, Ystgaard B, *et al.* Factors influencing return to  
work after aortocoronary bypass surgery. *Scandinavian journal of thoracic and*  
*cardiovascular surgery* 1992;**26**:187-92.



- 1  
2  
3 9                   Jespersen L, Abildstrom SZ, Hvelplund A, *et al.* Symptoms of angina  
4  
5 pectoris increase the probability of disability pension and premature exit from the workforce  
6  
7 even in the absence of obstructive coronary artery disease. *European heart journal*  
8  
9 2013;**34**:3294-303.  
10  
11  
12 10                   Osler M, Martensson S, Prescott E, *et al.* Impact of gender, co-morbidity  
13  
14 and social factors on labour market affiliation after first admission for acute coronary  
15  
16 syndrome. A cohort study of Danish patients 2001-2009. *PLoS One* 2014;**9**:e86758.  
17  
18  
19 11                   Zetterstrom K, Vaez M, Alexanderson K, *et al.* Disability pension after  
20  
21 coronary revascularization: a prospective nationwide register-based Swedish cohort study.  
22  
23 *European journal of preventive cardiology* 2015;**22**:304-11.  
24  
25  
26 12                   Gunn J, Kiviniemi T, Biancari F, *et al.* Predictors of permanent work  
27  
28 disability among  $\leq 50$ -year-old patients undergoing percutaneous coronary intervention.  
29  
30 *Scand J Work Environ Health* 2015;**41**:460-6.  
31  
32  
33 13                   Hamer M, Batty GD, Stamatakis E, *et al.* Comparison of risk factors for  
34  
35 fatal stroke and ischemic heart disease: a prospective follow up of the health survey for  
36  
37 England. *Atherosclerosis* 2011;**219**:807-10.  
38  
39  
40 14                   *International Statistical Classification of Diseases and Related Health*  
41  
42 *Problems (ICD-10)*. Geneva, Switzerland: World Health Organization 1994.  
43  
44  
45 15                   Deddens JA, Petersen MR. Approaches for estimating prevalence ratios.  
46  
47 *Occupational and environmental medicine* 2008;**65**:481, 501-6.  
48  
49  
50 16                   Greenland S. Model-based estimation of relative risks and other  
51  
52 epidemiologic measures in studies of common outcomes and in case-control studies.  
53  
54 *American journal of epidemiology* 2004;**160**:301-5.  
55  
56  
57 17                   Zou G. A modified poisson regression approach to prospective studies with  
58  
59 binary data. *American journal of epidemiology* 2004;**159**:702-6.  
60

- 1  
2  
3 18 Teasdale TW, Engberg AW. Disability pensions in relation to stroke: a  
4 population study. *Brain injury* 2002;**16**:997-1009.  
5  
6  
7 19 Medin J, Nordlund A, Ekberg K. Sick leave, disability pension and health-  
8 care-seeking behaviour prior to stroke, among people aged 30-65: a case-control study. *Brain*  
9 *injury* 2007;**21**:457-63.  
10  
11  
12  
13 20 Zetterstrom K, Voss M, Alexanderson K, *et al.* Disability Pension at the  
14 Time of Coronary Revascularisation Is Associated with Higher Five-Year Mortality; A  
15 Swedish Nationwide, Register-Based Prospective Cohort Study. *PLoS One*  
16 *2015*;**10**:e0135277.  
17  
18  
19  
20  
21 21 Dreyer RP, Xu X, Zhang W, *et al.* Return to Work After Acute Myocardial  
22 Infarction: Comparison Between Young Women and Men. *Circulation Cardiovascular*  
23 *quality and outcomes* 2016;**9**:S45-52.  
24  
25  
26  
27  
28  
29 22 van der Meer MG, Cramer MJ, van der Graaf Y, *et al.* Gender difference in  
30 long-term prognosis among patients with cardiovascular disease. *European journal of*  
31 *preventive cardiology* 2014;**21**:81-9.  
32  
33  
34  
35  
36 23 Mosca L, Barrett-Connor E, Wenger NK. Sex/gender differences in  
37 cardiovascular disease prevention: what a difference a decade makes. *Circulation*  
38 *2011*;**124**:2145-54.  
39  
40  
41  
42 24 Falkstedt D, Backhans M, Lundin A, *et al.* Do working conditions explain  
43 the increased risks of disability pension among men and women with low education? A  
44 follow-up of Swedish cohorts. *Scand J Work Environ Health* 2014;**40**:483-92.  
45  
46  
47  
48  
49 25 Kutlubaev MA, Hackett ML. Part II: predictors of depression after stroke  
50 and impact of depression on stroke outcome: an updated systematic review of observational  
51 studies. *International journal of stroke : official journal of the International Stroke Society*  
52 *2014*;**9**:1026-36.  
53  
54  
55  
56  
57  
58  
59  
60

- 1  
2  
3 26 Alabas OA, Hall M, Dondo TB, *et al.* Long-term excess mortality  
4 associated with diabetes following acute myocardial infarction: a population-based cohort  
5 study. *J Epidemiol Community Health* 2017;**71**:25-32.  
6  
7  
8  
9  
10 27 Myers V, Drory Y, Goldbourt U, *et al.* Multilevel socioeconomic status and  
11 incidence of frailty post myocardial infarction. *Int J Cardiol* 2014;**170**:338-43.  
12  
13  
14 28 Marshall IJ, Wang Y, Crichton S, *et al.* The effects of socioeconomic status  
15 on stroke risk and outcomes. *The Lancet Neurology* 2015;**14**:1206-18.  
16  
17  
18 29 Ludvigsson JF, Andersson E, Ekbom A, *et al.* External review and  
19 validation of the Swedish national inpatient register. *BMC Public Health* 2011;**11**:450.  
20  
21  
22  
23 30 Albertsen K, Lund T, Christensen KB, *et al.* Predictors of disability pension  
24 over a 10-year period for men and women. *Scand J Public Health* 2007;**35**:78-85.  
25  
26  
27 31 Bozorgmehr K, Maier W, Brenner H, *et al.* Social disparities in Disease  
28 Management Programmes for coronary heart disease in Germany: a cross-classified  
29 multilevel analysis. *J Epidemiol Community Health* 2015;**69**:1091-101.  
30  
31  
32  
33  
34 32 Arts W, Gelissen J. Three worlds of welfare capitalism or more? A state-of-  
35 the-art report. *Journal of European Social Policy* 2002;**12**:137-58.  
36  
37  
38  
39  
40  
41  
42  
43  
44  
45  
46  
47  
48  
49  
50  
51  
52  
53  
54  
55  
56  
57  
58  
59  
60

1  
2  
3 **Figure legends:**  
4  
5  
6  
7

8  
9 **Figure 1.** Cumulative incidence of disability pension 5 years before and 5 years after  
10 cardiovascular event, unadjusted. The arrow indicates the event. IHD=ischemic heart disease.  
11  
12

13  
14  
15  
16  
17 **Figure 2.** Adjusted percentage of people suffering an IHD or stroke event ending up on  
18 disability pension during first post-event year. Exponentiated least square means ( $\times 100$ )  
19 adjusted for sex, age, education, economic inactivity, family situation, birth country, type of  
20 living area, mental disorder, diabetes, cancer, and medical procedure. Error bars indicate 95%  
21 confidence intervals. IHD=ischemic heart disease.  
22  
23  
24  
25  
26  
27  
28  
29  
30  
31  
32  
33  
34  
35  
36  
37  
38  
39  
40  
41  
42  
43  
44  
45  
46  
47  
48  
49  
50  
51  
52  
53  
54  
55  
56  
57  
58  
59  
60

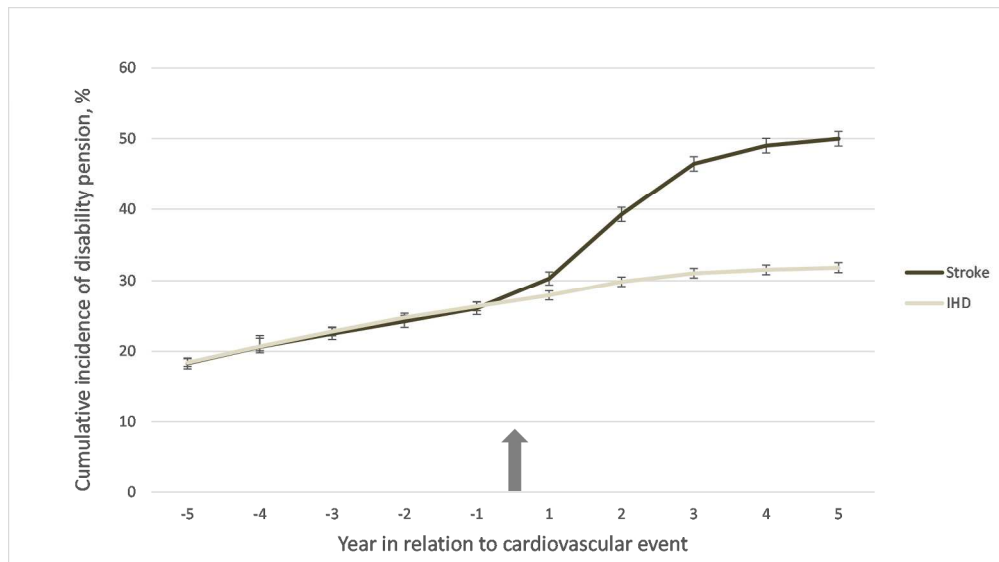

Figure 1. Cumulative incidence of disability pension 5 years before and 5 years after cardiovascular event, unadjusted. The arrow indicates the event. IHD=ischemic heart disease.

review only

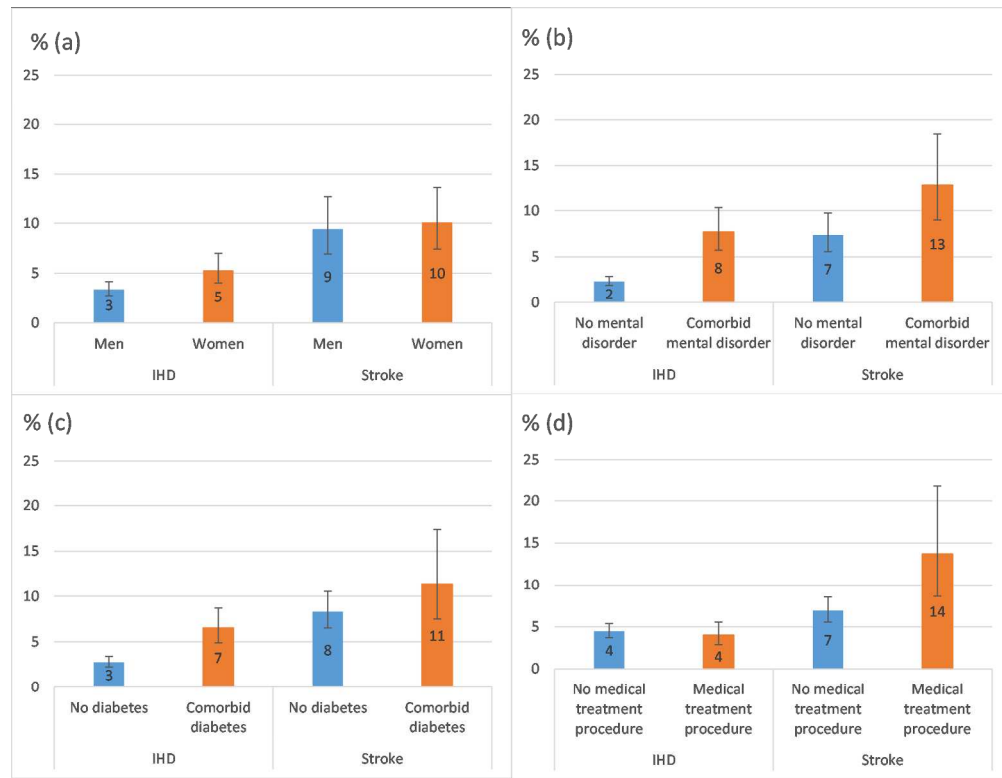

Figure 2. Adjusted percentage of people suffering an IHD or stroke event ending up on disability pension during first post-event year. Exponentiated least square means ( $\times 100$ ) adjusted for sex, age, education, economic inactivity, family situation, birth country, type of living area, mental disorder, diabetes, cancer, and medical procedure. Error bars indicate 95% confidence intervals. IHD=ischemic heart disease.

Supplementary Table 1. Predictors of disability pension in five year follow-up after cardiovascular (ischemic heart disease or stroke) event. In case of significant interaction ( $p < 0.05$ ), analyses are stratified by event type.

|                |                    | IHD or stroke |           |           |           | P for interaction with event type (IHD/stroke) | IHD       |           | Stroke    |           |
|----------------|--------------------|---------------|-----------|-----------|-----------|------------------------------------------------|-----------|-----------|-----------|-----------|
|                |                    | Crude RR      | 95% CI    | RR*       | 95% CI    |                                                | RR†       | 95% CI    | RR†       | 95% CI    |
| Age:           | ≤50 years          | 1 (=Ref.)     |           | 1 (=Ref.) |           | 0.99                                           |           |           |           |           |
|                | >50 years          | 1.23          | 1.14-1.32 | 1.45      | 1.35-1.57 |                                                |           |           |           |           |
| Sex:           | Men                | 1 (=Ref.)     |           | 1 (=Ref.) |           | <0.001                                         | 1 (=Ref.) |           | 1 (=Ref.) |           |
|                | Women              | 1.77          | 1.65-1.90 | 1.45      | 1.35-1.55 |                                                | 1.81      | 1.60-2.04 | 1.29      | 1.10-1.40 |
| Education:     | High               | 1 (=Ref.)     |           | 1 (=Ref.) |           | 0.013                                          | 1 (=Ref.) |           | 1 (=Ref.) |           |
|                | Intermediate       | 1.11          | 1.02-1.21 | 1.11      | 1.02-1.21 |                                                | 1.07      | 0.92-1.25 | 1.13      | 1.02-1.26 |
|                | Low                | 1.30          | 1.19-1.43 | 1.29      | 1.17-1.42 |                                                | 1.46      | 1.24-1.71 | 1.20      | 1.07-1.36 |
| Economically:  | Active             | 1 (=Ref.)     |           | 1 (=Ref.) |           | <0.001                                         | 1 (=Ref.) |           | 1 (=Ref.) |           |
|                | Inactive           | 1.54          | 1.41-1.68 | 1.35      | 1.23-1.48 |                                                | 1.78      | 1.54-2.05 | 1.16      | 1.03-1.30 |
| Family         | Married/cohab.     | 1 (=Ref.)     |           | 1 (=Ref.) |           | 0.19                                           |           |           |           |           |
|                | Single, no childr. | 1.19          | 1.11-1.27 | 1.11      | 1.03-1.19 |                                                |           |           |           |           |
|                | Single, childr.    | 1.22          | 1.07-1.39 | 1.04      | 0.91-1.19 |                                                |           |           |           |           |
| Birth country: | Sweden             | 1 (=Ref.)     |           | 1 (=Ref.) |           | <0.001                                         | 1 (=Ref.) |           | 1 (=Ref.) |           |

1  
2  
3  
4  
5  
6  
7  
8  
9  
10  
11  
12  
13  
14  
15  
16  
17  
18  
19  
20  
21  
22  
23  
24  
25  
26  
27  
28  
29  
30  
31  
32  
33  
34  
35  
36  
37  
38  
39  
40  
41  
42  
43  
44  
45  
46  
47

|                  |             |           |           |           |           |        |           |           |           |           |
|------------------|-------------|-----------|-----------|-----------|-----------|--------|-----------|-----------|-----------|-----------|
|                  | Other       | 1.15      | 1.06-1.26 | 1.20      | 1.10-1.31 |        | 1.49      | 1.30-1.70 | 1.04      | 0.92-1.17 |
| Living area:     | Large city  | 1 (=Ref.) |           | 1 (=Ref.) |           | 0.77   |           |           |           |           |
|                  | Medium-size | 1.19      | 1.10-1.29 | 1.26      | 1.16-1.36 |        |           |           |           |           |
|                  | Small town  | 1.18      | 1.08-1.28 | 1.27      | 1.17-1.39 |        |           |           |           |           |
| Cancer:          | Yes         | 1 (=Ref.) |           | 1 (=Ref.) |           | 0.065  |           |           |           |           |
|                  | No          | 1.47      | 1.20-1.79 | 1.32      | 1.08-1.61 |        |           |           |           |           |
| Mental disorder: | Yes         | 1 (=Ref.) |           | 1 (=Ref.) |           | <0.001 | 1 (=Ref.) |           | 1 (=Ref.) |           |
|                  | No          | 1.76      | 1.58-1.96 | 1.52      | 1.36-1.70 |        | 2.35      | 1.99-2.78 | 1.19      | 1.03-1.38 |
| Diabetes:        | Yes         | 1 (=Ref.) |           | 1 (=Ref.) |           | <0.001 | 1 (=Ref.) |           | 1 (=Ref.) |           |
|                  | No          | 1.45      | 1.30-1.63 | 1.64      | 1.46-1.83 |        | 2.05      | 1.76-2.39 | 1.30      | 1.10-1.54 |
| Procedure‡:      | Yes         | 1 (=Ref.) |           | 1 (=Ref.) |           | 0.28   |           |           |           |           |
|                  | No          | 0.83      | 0.74-0.93 | 1.29      | 1.15-1.45 |        |           |           |           |           |
| Type of event:   | IHD         | 1 (=Ref.) |           | 1 (=Ref.) |           |        |           |           |           |           |
|                  | Stroke      | 3.64      | 3.39-3.90 | 3.77      | 3.50-4.06 |        |           |           |           |           |

\* Multivariable model; all variables are entered simultaneously into the model

† Estimates are adjusted for all other variables

‡ Medical procedure =coronary artery bypass graft, percutaneous transluminal coronary angioplasty, other coronary distension procedure, or intravenous intracranial procedure



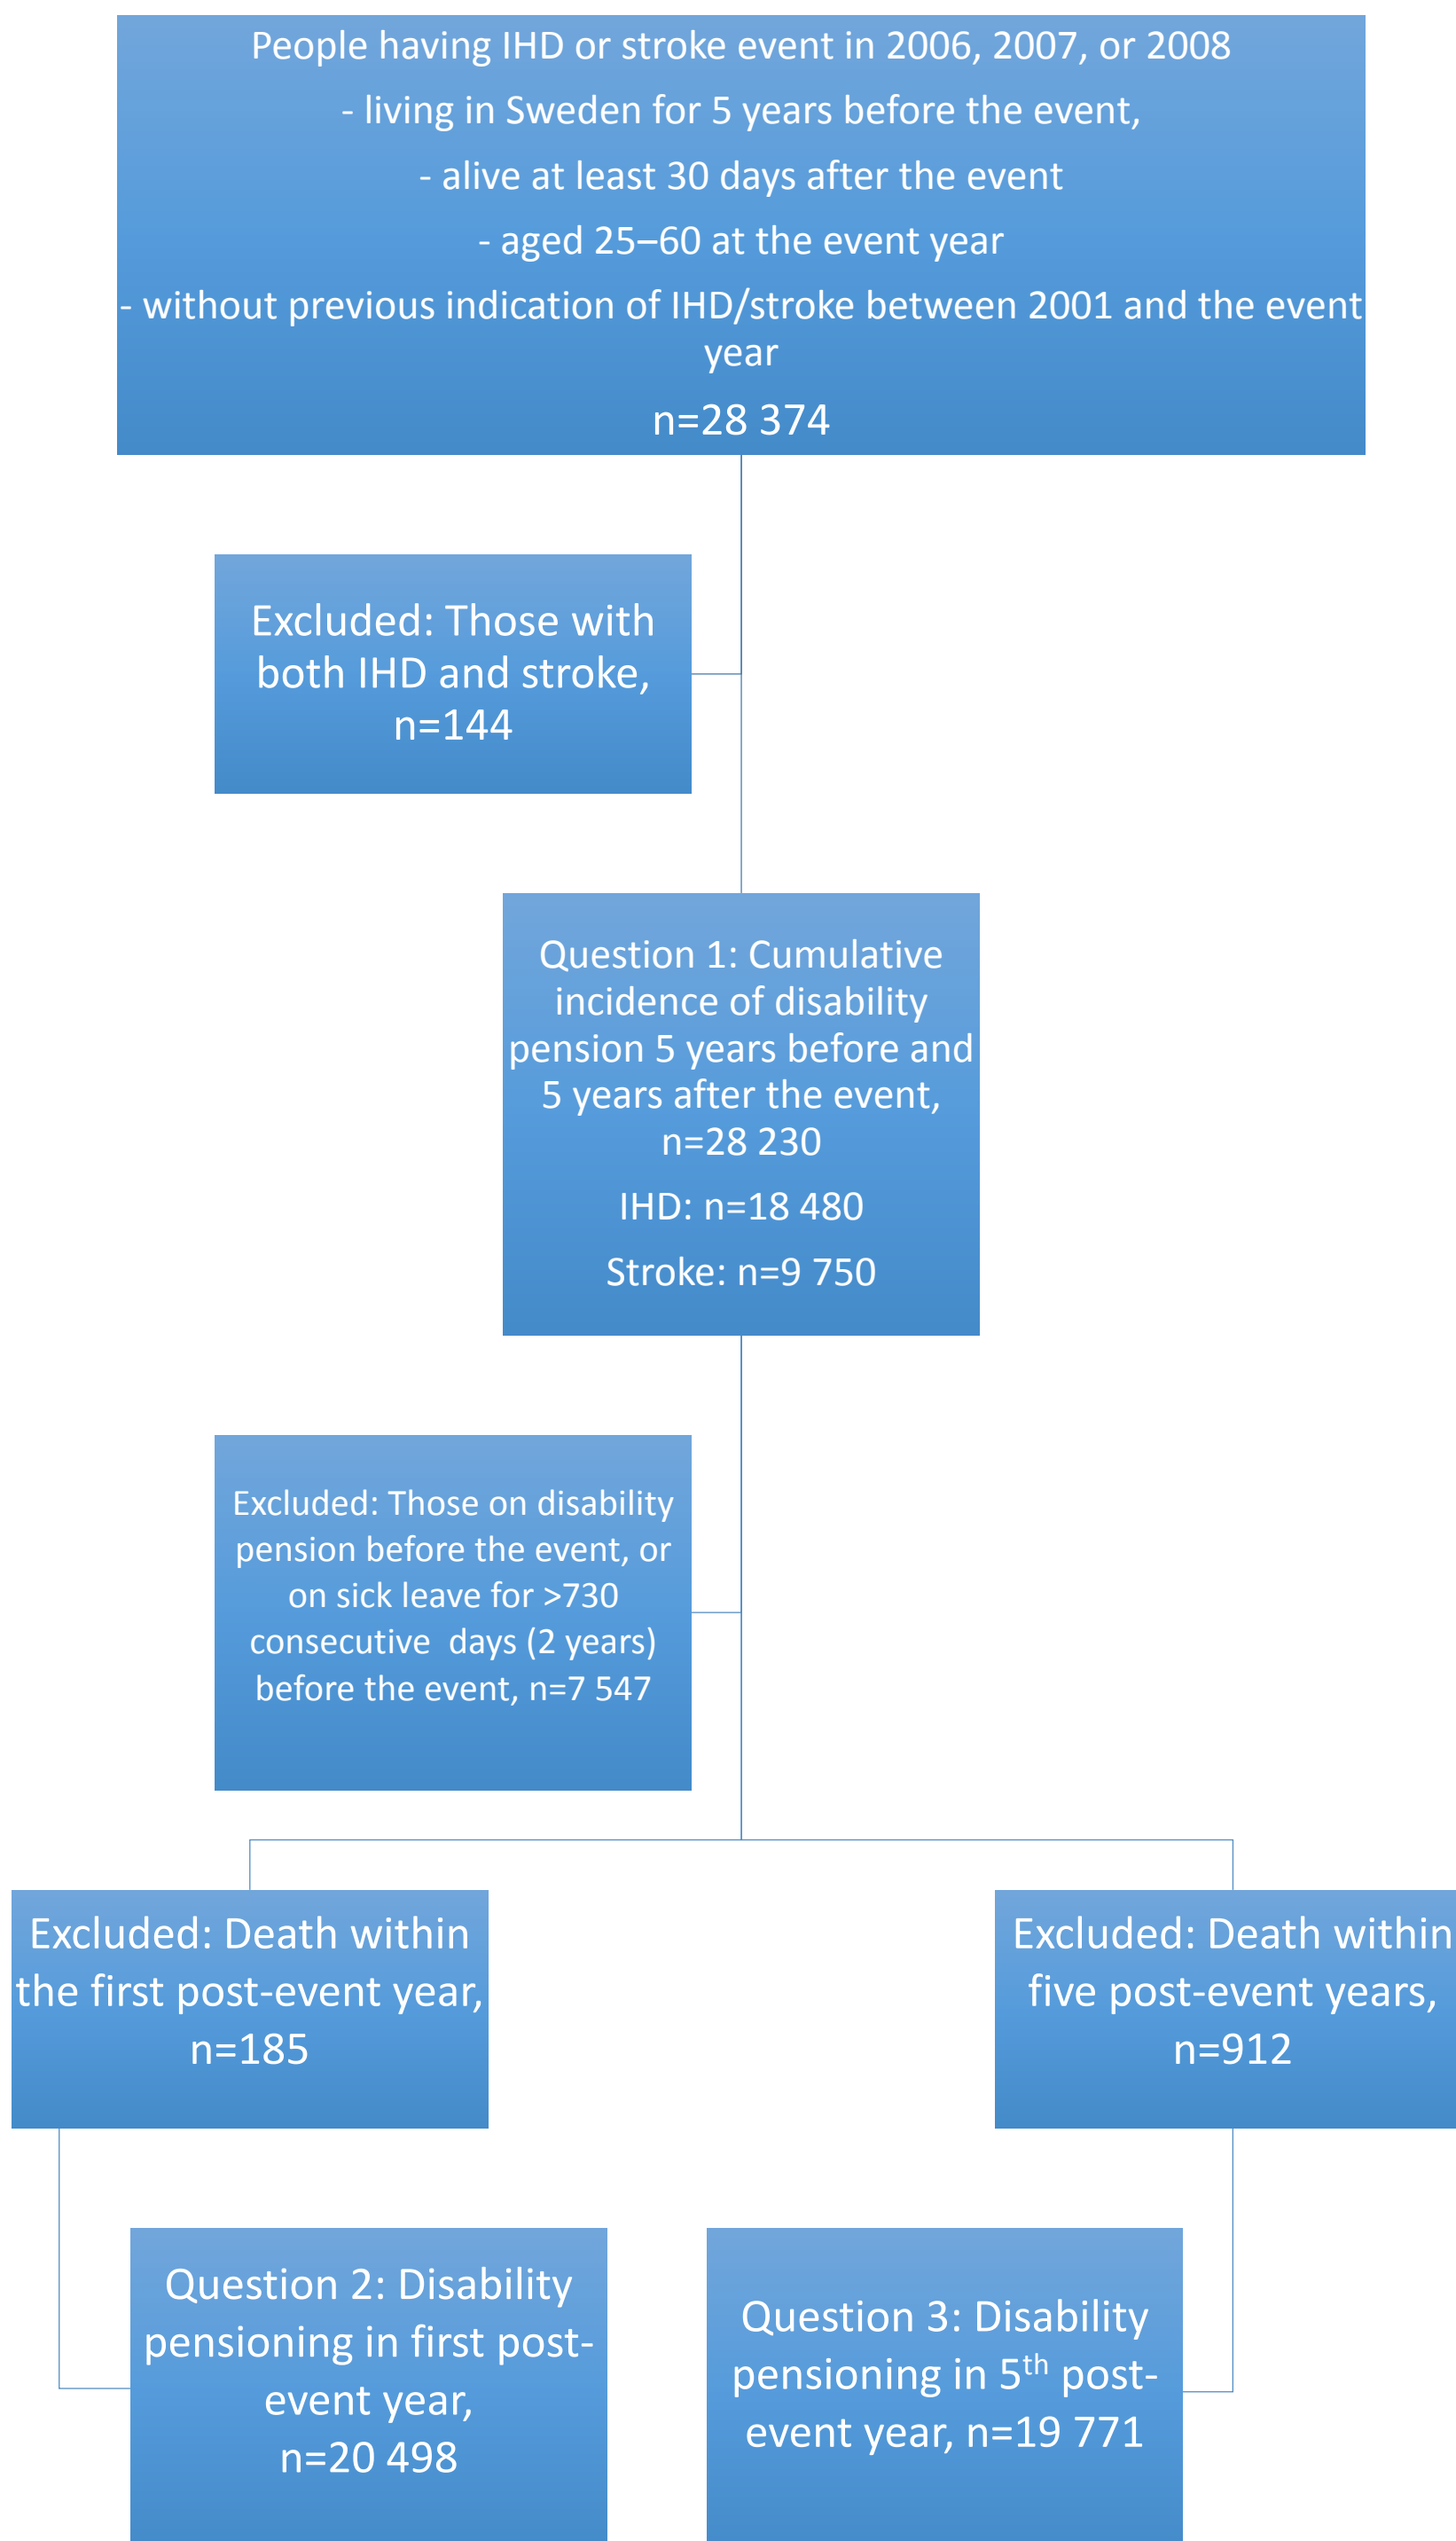

Supplementary Figure 1. Flow chart of study inclusion and exclusion criteria.

## STROBE Statement—checklist of items that should be included in reports of observational studies

|                              | Item No | Recommendation                                                                                                                                                                                                                                                                                                                                                                                                                                                         | Page                    |
|------------------------------|---------|------------------------------------------------------------------------------------------------------------------------------------------------------------------------------------------------------------------------------------------------------------------------------------------------------------------------------------------------------------------------------------------------------------------------------------------------------------------------|-------------------------|
| Title and abstract           | 1       | (a) Indicate the study's design with a commonly used term in the title or the abstract                                                                                                                                                                                                                                                                                                                                                                                 | 1                       |
|                              |         | (b) Provide in the abstract an informative and balanced summary of what was done and what was found                                                                                                                                                                                                                                                                                                                                                                    | 2                       |
| <b>Introduction</b>          |         |                                                                                                                                                                                                                                                                                                                                                                                                                                                                        |                         |
| Background/rationale         | 2       | Explain the scientific background and rationale for the investigation being reported                                                                                                                                                                                                                                                                                                                                                                                   | 4                       |
| Objectives                   | 3       | State specific objectives, including any prespecified hypotheses                                                                                                                                                                                                                                                                                                                                                                                                       | 4-5                     |
| <b>Methods</b>               |         |                                                                                                                                                                                                                                                                                                                                                                                                                                                                        |                         |
| Study design                 | 4       | Present key elements of study design early in the paper                                                                                                                                                                                                                                                                                                                                                                                                                | 6                       |
| Setting                      | 5       | Describe the setting, locations, and relevant dates, including periods of recruitment, exposure, follow-up, and data collection                                                                                                                                                                                                                                                                                                                                        | 6-7                     |
| Participants                 | 6       | (a) <i>Cohort study</i> —Give the eligibility criteria, and the sources and methods of selection of participants. Describe methods of follow-up<br><i>Case-control study</i> —Give the eligibility criteria, and the sources and methods of case ascertainment and control selection. Give the rationale for the choice of cases and controls<br><i>Cross-sectional study</i> —Give the eligibility criteria, and the sources and methods of selection of participants | 6-7                     |
|                              |         | (b) <i>Cohort study</i> —For matched studies, give matching criteria and number of exposed and unexposed<br><i>Case-control study</i> —For matched studies, give matching criteria and the number of controls per case                                                                                                                                                                                                                                                 |                         |
| Variables                    | 7       | Clearly define all outcomes, exposures, predictors, potential confounders, and effect modifiers. Give diagnostic criteria, if applicable                                                                                                                                                                                                                                                                                                                               | 7-8                     |
| Data sources/<br>measurement | 8*      | For each variable of interest, give sources of data and details of methods of assessment (measurement). Describe comparability of assessment methods if there is more than one group                                                                                                                                                                                                                                                                                   | 7-8                     |
| Bias                         | 9       | Describe any efforts to address potential sources of bias                                                                                                                                                                                                                                                                                                                                                                                                              | 6,7                     |
| Study size                   | 10      | Explain how the study size was arrived at                                                                                                                                                                                                                                                                                                                                                                                                                              | Supplementary<br>Fig 1. |
| Quantitative variables       | 11      | Explain how quantitative variables were handled in the analyses. If applicable, describe which groupings were chosen and why                                                                                                                                                                                                                                                                                                                                           | 7-8                     |
| Statistical methods          | 12      | (a) Describe all statistical methods, including those used to control for confounding                                                                                                                                                                                                                                                                                                                                                                                  | 8-9                     |
|                              |         | (b) Describe any methods used to examine subgroups and                                                                                                                                                                                                                                                                                                                                                                                                                 | 9                       |

|                   |     |                                                                                                                                                                                                              |                                 |
|-------------------|-----|--------------------------------------------------------------------------------------------------------------------------------------------------------------------------------------------------------------|---------------------------------|
|                   |     | interactions                                                                                                                                                                                                 |                                 |
|                   |     | (c) Explain how missing data were addressed                                                                                                                                                                  | no missing data                 |
|                   |     | (d) <i>Cohort study</i> —If applicable, explain how loss to follow-up was addressed                                                                                                                          | no loss to follow-up            |
|                   |     | <i>Case-control study</i> —If applicable, explain how matching of cases and controls was addressed                                                                                                           |                                 |
|                   |     | <i>Cross-sectional study</i> —If applicable, describe analytical methods taking account of sampling strategy                                                                                                 |                                 |
|                   |     | € Describe any sensitivity analyses                                                                                                                                                                          | 9                               |
| <b>Results</b>    |     |                                                                                                                                                                                                              |                                 |
| Participants      | 13* | (a) Report numbers of individuals at each stage of study—eg numbers potentially eligible, examined for eligibility, confirmed eligible, included in the study, completing follow-up, and analysed            | Supplementary Fig 1.            |
|                   |     | (b) Give reasons for non-participation at each stage                                                                                                                                                         | Supplementary Fig 1.            |
|                   |     | (c) Consider use of a flow diagram                                                                                                                                                                           | Supplementary Fig 1.            |
| Descriptive data  | 14* | (a) Give characteristics of study participants (eg demographic, clinical, social) and information on exposures and potential confounders                                                                     | Table 1                         |
|                   |     | (b) Indicate number of participants with missing data for each variable of interest                                                                                                                          | no missing data                 |
|                   |     | (c) <i>Cohort study</i> —Summarise follow-up time (eg, average and total amount)                                                                                                                             | Supplementary Fig 1.            |
| Outcome data      | 15* | <i>Cohort study</i> —Report numbers of outcome events or summary measures over time                                                                                                                          | Table 1                         |
|                   |     | <i>Case-control study</i> —Report numbers in each exposure category, or summary measures of exposure                                                                                                         |                                 |
|                   |     | <i>Cross-sectional study</i> —Report numbers of outcome events or summary measures                                                                                                                           |                                 |
| Main results      | 16  | (a) Give unadjusted estimates and, if applicable, confounder-adjusted estimates and their precision (eg, 95% confidence interval). Make clear which confounders were adjusted for and why they were included | Table 2                         |
|                   |     | (b) Report category boundaries when continuous variables were categorized                                                                                                                                    |                                 |
|                   |     | (c) If relevant, consider translating estimates of relative risk into absolute risk for a meaningful time period                                                                                             | Figure 1, Figure 2              |
| Other analyses    | 17  | Report other analyses done—eg analyses of subgroups and interactions, and sensitivity analyses                                                                                                               | Table 2, Supplementary Table 1. |
| <b>Discussion</b> |     |                                                                                                                                                                                                              |                                 |
| Key results       | 18  | Summarise key results with reference to study objectives                                                                                                                                                     | 19-20                           |
| Limitations       | 19  | Discuss limitations of the study, taking into account sources of potential bias or imprecision. Discuss both direction and magnitude of any potential bias                                                   | 22                              |

|   |                  |    |                                                                         |
|---|------------------|----|-------------------------------------------------------------------------|
| 1 |                  |    |                                                                         |
| 2 | Interpretation   | 20 | Give a cautious overall interpretation of results considering           |
| 3 |                  |    | objectives, limitations, multiplicity of analyses, results from similar |
| 4 |                  |    | studies, and other relevant evidence                                    |
| 5 |                  |    |                                                                         |
| 6 | Generalisability | 21 | Discuss the generalisability (external validity) of the study results   |
| 7 |                  |    |                                                                         |

---

#### Other information

---

|    |         |    |                                                                       |
|----|---------|----|-----------------------------------------------------------------------|
| 8  | Funding | 22 | Give the source of funding and the role of the funders for the        |
| 9  |         |    | present study and, if applicable, for the original study on which the |
| 10 |         |    | present article is based                                              |
| 11 |         |    |                                                                       |
| 12 |         |    |                                                                       |

\*Give information separately for cases and controls in case-control studies and, if applicable, for exposed and unexposed groups in cohort and cross-sectional studies.

**Note:** An Explanation and Elaboration article discusses each checklist item and gives methodological background and published examples of transparent reporting. The STROBE checklist is best used in conjunction with this article (freely available on the Web sites of PLoS Medicine at <http://www.plosmedicine.org/>, Annals of Internal Medicine at <http://www.annals.org/>, and Epidemiology at <http://www.epidem.com/>). Information on the STROBE Initiative is available at [www.strobe-statement.org](http://www.strobe-statement.org).

# BMJ Open

## Permanent work disability before and after ischemic heart disease or stroke event: A nationwide population-based cohort study in Sweden

|                                 |                                                                                                                                                                                                                                                                                                                                                                                                                                                                                                             |
|---------------------------------|-------------------------------------------------------------------------------------------------------------------------------------------------------------------------------------------------------------------------------------------------------------------------------------------------------------------------------------------------------------------------------------------------------------------------------------------------------------------------------------------------------------|
| Journal:                        | <i>BMJ Open</i>                                                                                                                                                                                                                                                                                                                                                                                                                                                                                             |
| Manuscript ID                   | bmjopen-2017-017910.R2                                                                                                                                                                                                                                                                                                                                                                                                                                                                                      |
| Article Type:                   | Research                                                                                                                                                                                                                                                                                                                                                                                                                                                                                                    |
| Date Submitted by the Author:   | 17-Aug-2017                                                                                                                                                                                                                                                                                                                                                                                                                                                                                                 |
| Complete List of Authors:       | Ervasti, Jenni; Finnish Institute of Occupational Health, Centre of Expertise for Work Organizations<br>Virtanen, Marianna; Finnish Institute of Occupational Health, Centre of Expertise for Work Organizations<br>Lallukka, Tea; Finnish Institute of Occupational Health,<br>Friberg, Emilie<br>Mittendorfer-Rutz, Ellenor; Karolinska Institutet, Clinical Neuroscience<br>Lundström, Erik; Karolinska Institutet Department of Clinical Neuroscience<br>Alexanderson, Kristina; Karolinska Institutet, |
| <b>Primary Subject Heading</b>: | Epidemiology                                                                                                                                                                                                                                                                                                                                                                                                                                                                                                |
| Secondary Subject Heading:      | Cardiovascular medicine, Occupational and environmental medicine, Public health                                                                                                                                                                                                                                                                                                                                                                                                                             |
| Keywords:                       | Ischaemic heart disease < CARDIOLOGY, Stroke < NEUROLOGY, EPIDEMIOLOGY, OCCUPATIONAL & INDUSTRIAL MEDICINE, sick leave, disability pension                                                                                                                                                                                                                                                                                                                                                                  |
|                                 |                                                                                                                                                                                                                                                                                                                                                                                                                                                                                                             |

SCHOLARONE™  
Manuscripts

1  
2  
3  
4  
5  
6 **Permanent work disability before and after ischemic heart disease or**  
7  
8 **stroke event: A nationwide population-based cohort study in Sweden**  
9  
10

11  
12  
13  
14 Jenni Ervasti<sup>a</sup>, Marianna Virtanen<sup>a</sup>, Tea Lallukka<sup>a,b</sup>, Emilie Friberg<sup>c</sup>, Ellenor Mittendorfer-  
15 Rutz<sup>c</sup>, Erik Lundström<sup>d</sup>, Kristina Alexanderson<sup>c</sup>  
16  
17  
18

19  
20  
21  
22 a Finnish Institute of Occupational Health, Helsinki, Finland  
23

24  
25 b Faculty of Medicine, University of Helsinki, Finland  
26

27  
28 c Division of Insurance Medicine, Department of Clinical Neuroscience, Karolinska  
29 Institutet, SE-171 77 Stockholm, Sweden  
30  
31

32  
33 d Division of Neurology, Department of Clinical Neuroscience, Karolinska Institutet,  
34 Stockholm, Sweden  
35  
36

37  
38  
39  
40 **Corresponding author:** Jenni Ervasti, Finnish Institute of Occupational Health, PB 40, FI-  
41 00251 Helsinki, Finland, [jenni.ervasti@ttl.fi](mailto:jenni.ervasti@ttl.fi), tel. +35843825 5475  
42  
43  
44  
45  
46  
47  
48  
49  
50  
51  
52  
53  
54  
55  
56  
57  
58  
59  
60

## ABSTRACT

**Objectives:** We examined the risk of disability pension before and after ischemic heart disease (IHD) or stroke event, the burden of stroke compared to IHD, and which factors predicted disability pension after either event.

**Design:** A population-based cohort study with follow-up five years before and after the event. Register data were analysed with general linear modelling with binary and Poisson distributions including interaction tests for event type (IHD/stroke).

**Setting and participants:** All people living in Sweden, aged 25–60 years at the first event year, who had been living in Sweden for five years before the event and had no indication of IHD or stroke prior to the index event in 2006–2008 were included, except for cases in which death occurred within 30 days of the event. People with both IHD and stroke were excluded, resulting in 18 480 cases of IHD (65%) and 9750 stroke cases (35%).

**Primary outcome measures:** Disability pension.

**Results:** Of those going to suffer IHD or stroke event, 25% were already on disability pension a year before the event. The adjusted odds ratio (OR) for disability pension at first post-event year was 2.64 fold (95% CI 2.25-3.11) for people with stroke compared to IHD. Economic inactivity predicted disability pension regardless of event type (OR=3.40; 95% CI 2.85-4.04). Comorbid mental disorder was associated with the greatest risk (OR=3.60; 95% CI 2.69-4.83) after an IHD event. Regarding stroke, medical procedure, a proxy for event severity, was the largest contributor (OR=2.27, 95% CI 1.43-3.60).

**Conclusions:** While IHD event was more common, stroke involved more permanent work disability. Demographic, socioeconomic, and comorbidity-related factors were associated

1  
2  
3 with disability pension both before and after the event. The results help occupational and  
4  
5 other healthcare professionals to identify vulnerable groups at risk for permanent labour  
6  
7 market exclusion after such an event.  
8  
9

10  
11  
12  
13 **Keywords:** Cardiovascular disease; Cohort studies; Disability pension; Ischemic heart  
14  
15 disease; Occupational Health; Sick-leave; Stroke  
16  
17

18  
19  
20  
21 **Strengths and limitations of this study:**  
22

- 23  
24  
25 • With large population-based cohort data with reliable register-based measures and no  
26  
27 loss to follow up, we provided information about how ischemic heart disease (IHD)  
28  
29 and stroke events were linked with risk of permanent work disability, i.e., disability  
30  
31 pension.  
32  
33  
34 • Compared to previous studies focusing on IHD, we had a longer follow-up time – five  
35  
36 years – both before and after the event.  
37  
38  
39 • We were able to include a large set of predictors of disability pension, including  
40  
41 sociodemographic factors, comorbid conditions, and medical procedure.  
42  
43  
44 • The results may help when planning preventive measures for permanent work  
45  
46 disability after IHD or stroke event.  
47  
48  
49 • As we were only able to include information that was available in administrative  
50  
51 registers, we had no data on quality and outcome of post-event care, individuals'  
52  
53 health behaviours, or workplace psychosocial factors.  
54  
55  
56  
57  
58  
59  
60



## INTRODUCTION

Worldwide, 11% of the total disease burden as measured with disability-adjusted life years, is attributed to ischemic heart disease (IHD) and stroke.[1] Due to improved treatment of both IHD and stroke contributing to declining mortality,[2] and because of the pressures of extended working careers, the proportion of working-age people with cardiovascular disease is likely to increase. While 53-73% of people suffering a cardiovascular event return to work,[3-6] significantly higher proportion leaves working life permanently during the years following a cardiovascular event than among people without such diagnosis.[7] In order to help people with this disease to continue working, it is important to study the risk factors leading to permanent work disability (i.e., disability pension) after a cardiovascular event.

Disease severity, comorbidity, female sex, higher age, and lower socioeconomic status have been found to predict disability pension after an IHD event.[7-12] However, we found no previous research that specifically examined the predictors of disability pension after a stroke event. Research on stroke has focused on return to work, which has been associated with a less serious disability, younger age, higher socioeconomic position, and less cardiovascular risk factors.[4-6] While IHD and stroke share several common risk factors, some discrepancies also point to differential pattern of predictors.[13] Previous studies have not examined whether differences exist between the predictors of disability pension after IHD and stroke events.

Our aim was to (a) determine the proportion and characteristics of people who suffered an IHD or stroke event at working age who were already on disability pension prior to the event; and (b) examine the medical (comorbidity, event severity) and non-medical

1  
2  
3 (demographic and socioeconomic) predictors of disability pension in the first post-event year,  
4  
5 including examining difference in IHD and stroke cases.  
6  
7

8 From a labour force policy perspective, it is important to determine whether the  
9  
10 predictors of disability pension shortly after the event are different from those that predict  
11  
12 disability pension in the longer run. Thus, as a sensitivity analysis, we studied the medical  
13  
14 and non-medical predictors of disability pension in the fifth post-event year and whether  
15  
16 there were differences between IHD and stroke cases.  
17  
18  
19  
20  
21  
22  
23  
24  
25  
26  
27  
28  
29  
30  
31  
32  
33  
34  
35  
36  
37  
38  
39  
40  
41  
42  
43  
44  
45  
46  
47  
48  
49  
50  
51  
52  
53  
54  
55  
56  
57  
58  
59  
60

## METHODS

### Study design

The population-based longitudinal cohort study was conducted based on register data obtained from three Swedish authorities and linked using the personal identity number assigned to all residents in Sweden. The following registers were used:

1. Statistics Sweden: Longitudinal Integration Database for Health Insurance and Labour Market Studies (LISA) on sex, age, education, family situation, place of birth, type of living area, and labour market activity
2. National Board of Health and Welfare: diagnosis-specific data on hospitalizations and specialized outpatient care (coded according to the International Classification of Diseases (ICD-10)[14]); medical procedures; cancer register; date of death
3. National Social Insurance Agency: Annual sickness absence data (pre-event) and disability pension data.

Our study cohort consisted of all people living in Sweden, who at the event year were aged 25 to 60 years, had been living in Sweden for five years before the event, and had no indication of cardiovascular events in the registers between 2001 and the event year. First event dates in 2006, 2007, and 2008 were included, except for cases in which death occurred within 30 days of the event. This resulted in a sample of 28 374 cases. The data on cumulative disability pension were gathered for five years prior to the event date, and five years after the event. People with both IHD and stroke were excluded (n=144), resulting in 18 480 cases of IHD and 9750 stroke cases.

1  
2  
3 In prospective analyses on the predictors of disability pension in the first and  
4 fifth post-event year, individuals already on disability pension at the time of the event and  
5 people with more than 730 sickness absence days (two years) prior to the event were  
6 excluded (n=7547), resulting in a cohort of 20 683 individuals. Those who died or moved  
7 abroad were excluded from the death/emigration year onwards. This resulted in a final  
8 sample of 20 498 individuals for analyses of the onset of disability pension during the first  
9 post-event year (185 individuals died or moved abroad during the first year), and 19 771 for  
10 analysis of the onset of disability pension in the fifth post-event year (912 individuals died or  
11 moved abroad during the five follow-up years). Supplementary Figure 1 shows a flow chart  
12 of inclusion and exclusion criteria regarding each of the study questions.  
13  
14  
15  
16  
17  
18  
19  
20  
21  
22  
23  
24  
25  
26  
27

## 28 **Measures**

29  
30  
31  
32  
33  
34 An IHD event was based on hospitalization for myocardial infarction or other IHD, excluding  
35 angina pectoris (i.e., codes I21–I25 were included). A stroke event was based on  
36 hospitalization for stroke (ICD-10 codes I60, I61, I63, and I64).  
37  
38  
39  
40

41  
42 For the outcome, annual data on disability pension days were gathered. In  
43 Sweden, all individuals aged 30 to 64, including people with no previous income, can be  
44 granted disability pension if their work capacity is permanently reduced owing to disease or  
45 injury. Individuals aged 19 to 29 can be granted temporary disability pension in cases of such  
46 reduced work capacity or in order to complete compulsory education.  
47  
48  
49  
50  
51

52  
53 The predictors of disability pension, all measured in the event year, were age,  
54 sex, education, economic inactivity, type of living area, family situation, birth country,  
55 mental disorder, cancer, diabetes, and medical procedure during the event. Age was  
56  
57  
58  
59  
60

1  
2  
3 dichotomized as “50 years or less” and “more than 50 years”. Education was classified as  
4  
5 “low” (<10 years), “intermediate” (10–12 years = high school), or “high” (>12 years =  
6  
7 college or university). Economic activity was coded as “economically active” (in paid work)  
8  
9 or “economically inactive” (not in paid work, including for example the unemployed,  
10  
11 students, and those on parental leave). Family situation was classified as  
12  
13 “married/cohabiting”, “not married/cohabiting without children” (i.e., single), or “not  
14  
15 married/cohabiting with children” (i.e., single parent). Birth country was dichotomized into  
16  
17 “Sweden” or “country other than Sweden”. Type of living area was classified as “large city”,  
18  
19 “medium-sized town”, or “small town/village”.  
20  
21

22  
23  
24 Cancer (ICD-10 codes C00-D48) was based on information in the cancer  
25  
26 register, and mental disorders (F00-F99) and diabetes (E10-E14) were based on information  
27  
28 from the patient register (inpatient and specialized outpatient care). All the diseases were  
29  
30 coded “yes” or “no”  
31  
32

33  
34 Medical procedures at T-1 (year prior to the event) or T1 (year after the event)  
35  
36 included coronary artery bypass graft, percutaneous coronary intervention, other coronary  
37  
38 distension procedure, or intravenous intracranial procedure. People who had undergone at  
39  
40 least one such procedure were coded “yes” and those without “no”.  
41  
42  
43  
44

### 45 46 **Statistical analysis** 47 48 49 50

51  
52 The cumulative incidence trend in disability pension five years before and five years after the  
53  
54 event was calculated with frequencies (percentage of individuals on disability pension each  
55  
56 year, with 95% confidence intervals [CI]). Between-group differences in disability pension  
57  
58 were tested with Chi<sup>2</sup> tests. To assess the risk of new disability pension during the first year  
59  
60

1  
2  
3 after the event (outcome incidence 3%), we used generalized linear model with binary  
4  
5 distribution and logit link function, which produced odds ratios (OR) with 95% CI. To  
6  
7 examine the differences between the predictors of disability pension for IHD and stroke  
8  
9 cases, we tested the effect modification (interaction) of event type (IHD/stroke) and each of  
10  
11 the predictors. When a statistically significant ( $p < 0.05$ ) interaction effect was observed, we  
12  
13 performed stratified subgroup analyses. The relative and absolute differences in disability  
14  
15 pensioning by these subgroups were illustrated with least square means adjusted for all  
16  
17 predictor variables. These adjusted means were produced using Poisson distribution due to  
18  
19 conversion problems with binary logistic models.  
20  
21

22  
23 In sensitivity analyses, we used generalized linear model with Poisson  
24  
25 distribution and log link function to produce relative risks (RR) with 95% CI to estimate  
26  
27 predictors of disability pension by the fifth year after the cardiovascular event (outcome  
28  
29 incidence 18%). Different regression methods were used for the fifth and the first post-event  
30  
31 year since OR is not a good approximation of risk ratio when outcome prevalence is above  
32  
33 10%. [15-17] SAS 9.4 was used for all analyses.  
34  
35  
36  
37  
38  
39  
40  
41  
42  
43  
44  
45  
46  
47  
48  
49  
50  
51  
52  
53  
54  
55  
56  
57  
58  
59  
60

## RESULTS

### Cumulative incidence of disability pension

Figure 1 illustrates the cumulative incidence of disability pension five years before and five years after a cardiovascular event of IHD or stroke: The cumulative incidence of disability pension was similar (up to 25%) until the event for both IHD and stroke. Thus, about a quarter of working-age people who had suffered incident IHD or a stroke were already on disability pension before the event. The highest prevalence of pre-event disability pension was observed among women (37%), people who were economically inactive (69%), had low education (36%), were born outside Sweden (35%), and had comorbid cancer (36%), mental disorder (58%), or diabetes (48%) at the event year (Table 1).

After the event, the cumulative incidence of disability pension was substantially higher (reaching 50%) among people who suffered a stroke event than among those who suffered an IHD event (slightly above 30%) (Figure 1). Similar characteristics were associated with first and fifth post-event year disability pensioning, as observed before the event (Table 1.)

Table 1. Characteristics of study participants by disability pension before and after a cardiovascular (ischemic heart disease or stroke) event

| Characteristics |                    | Pre-event disability pension |                   |                   | Disability pension in first post-event year |                   |                  | Disability pension in fifth post-event year |                   |                   |
|-----------------|--------------------|------------------------------|-------------------|-------------------|---------------------------------------------|-------------------|------------------|---------------------------------------------|-------------------|-------------------|
|                 |                    | n                            | No (n=20683)<br>% | Yes (n=7547)<br>% | n                                           | No (n=19802)<br>% | Yes (n=696)<br>% | n                                           | No (n=16317)<br>% | Yes (n=3454)<br>% |
| Sex:            | Men                | 19713                        | 78                | 22                | 15222                                       | 97                | 3                | 14661                                       | 85                | 15                |
|                 | Women              | 8517                         | 63                | 37                | 5276                                        | 96                | 4                | 5110                                        | 74                | 26                |
| Age:            | ≤50 years          | 8332                         | 79                | 21                | 6575                                        | 97                | 3                | 6412                                        | 85                | 15                |
|                 | >50 years          | 19898                        | 71                | 29                | 13923                                       | 96                | 4                | 13359                                       | 81                | 19                |
| Education:      | Low                | 7854                         | 64                | 36                | 4981                                        | 95                | 5                | 4774                                        | 80                | 20                |
|                 | Intermediate       | 14095                        | 73                | 27                | 10274                                       | 97                | 3                | 9902                                        | 83                | 17                |
|                 | High               | 6281                         | 84                | 16                | 5243                                        | 97                | 3                | 5095                                        | 84                | 16                |
| Economically:   | Active             | 20076                        | 91                | 9                 | 18045                                       | 97                | 3                | 17460                                       | 85                | 15                |
|                 | Inactive           | 8154                         | 31                | 69                | 2453                                        | 90                | 10               | 2366                                        | 75                | 25                |
| Family          | Married/cohab.     | 16121                        | 78                | 22                | 12513                                       | 97                | 3                | 12181                                       | 84                | 16                |
|                 | Single, no childr. | 10310                        | 66                | 34                | 6693                                        | 96                | 4                | 6339                                        | 81                | 19                |
|                 | Single, childr.    | 1799                         | 72                | 28                | 1292                                        | 97                | 3                | 1251                                        | 80                | 20                |
| Birth country:  | Sweden             | 23126                        | 75                | 25                | 17198                                       | 97                | 3                | 16582                                       | 83                | 17                |
|                 | Other              | 5104                         | 65                | 35                | 3300                                        | 95                | 5                | 3189                                        | 80                | 20                |
| Living area:    | Large city         | 9163                         | 75                | 25                | 6776                                        | 97                | 3                | 6527                                        | 84                | 16                |
|                 | Medium-size        | 10019                        | 73                | 27                | 7212                                        | 97                | 3                | 6979                                        | 82                | 18                |



|                  |            |       |    |    |       |    |    |       |    |    |
|------------------|------------|-------|----|----|-------|----|----|-------|----|----|
|                  | Small town | 9048  | 73 | 27 | 6510  | 96 | 4  | 6265  | 82 | 18 |
| Cancer:          | Yes        | 847   | 64 | 36 | 482   | 93 | 7  | 382   | 75 | 25 |
|                  | No         | 27383 | 74 | 26 | 20016 | 97 | 3  | 19389 | 83 | 17 |
| Mental disorder: | Yes        | 3286  | 42 | 58 | 1352  | 90 | 10 | 1236  | 71 | 29 |
|                  | No         | 24944 | 77 | 23 | 19146 | 97 | 3  | 18535 | 83 | 17 |
| Diabetes:        | Yes        | 2887  | 52 | 48 | 1490  | 94 | 6  | 1381  | 75 | 25 |
|                  | No         | 25343 | 76 | 24 | 19008 | 97 | 3  | 18390 | 83 | 17 |
| Procedure*:      | Yes        | 3077  | 78 | 22 | 2379  | 97 | 3  | 2318  | 85 | 15 |
|                  | No         | 25153 | 73 | 27 | 18119 | 97 | 3  | 17453 | 82 | 18 |
| Type of event:   | IHD        | 18480 | 73 | 27 | 13450 | 98 | 2  | 13028 | 91 | 9  |
|                  | Stroke     | 9750  | 73 | 27 | 7048  | 94 | 6  | 6743  | 67 | 33 |

\*Medical procedure=coronary artery bypass graft, percutaneous coronary intervention, other coronary distension procedure, or intravenous intracranial procedure

Note. All p-values for difference between groups (Chi<sup>2</sup>) were <0.01 except for 'pre-event disability pension and type of event', 'disability pension during the event year and living area', and 'disability pension during the event year and medical procedure.

### New-onset disability pension in first post-event year

Table 2 presents the both the unadjusted and adjusted results on factors associated with the risk of disability pension during the first post-event year. After adjustment for sociodemographic factors, comorbid conditions, and medical procedures, stroke patients were at a higher risk of disability pension during the first post-event year than people who had suffered an IHD event (OR=2.79; 95% CI 2.37-3.29). Among both IHD and stroke patients, older age (OR=1.66; 95% CI 1.38-1.98), low education (OR=1.58; 95% CI 1.27-1.97), economic inactivity (OR=3.40; 95% CI 2.85-4.04), being single without children (OR=1.25; 95% CI 1.06-1.48), birth country other than Sweden (OR=1.27; 95% CI 1.04-1.55), living in small towns (OR=1.32; 95% CI 1.08-1.61), and comorbid cancer (OR=1.85; 95% CI 1.27-2.69) were associated with higher odds of disability pension in the first post-event year.

Table 2. Predictors of disability pension during first year after cardiovascular event. In case of significant interaction ( $p < 0.05$ ), analyses are stratified by event type.

|               |                    | IHD or stroke |           |           |           | P for interaction with event type (IHD/stroke) | IHD       |           | Stroke    |           |
|---------------|--------------------|---------------|-----------|-----------|-----------|------------------------------------------------|-----------|-----------|-----------|-----------|
|               |                    | Crude OR      | 95% CI    | OR*       | 95% CI    |                                                | OR†       | 95% CI    | OR†       | 95% CI    |
| Age:          | ≤50 years          | 1 (=Ref.)     |           | 1 (=Ref.) |           | 0.26                                           |           |           |           |           |
|               | >50 years          | 1.35          | 1.13-1.60 | 1.66      | 1.38-1.98 |                                                |           |           |           |           |
| Sex:          | Men                | 1 (=Ref.)     |           | 1 (=Ref.) |           | 0.03                                           | 1 (=Ref.) |           | 1 (=Ref.) |           |
|               | Women              | 1.48          | 1.26-1.74 | 1.34      | 1.13-1.59 |                                                | 1.62      | 1.25-2.11 | 1.12      | 0.90-1.39 |
| Education:    | High               | 1 (=Ref.)     |           | 1 (=Ref.) |           | 0.57                                           |           |           |           |           |
|               | Intermediate       | 1.19          | 0.97-1.45 | 1.10      | 0.89-1.35 |                                                |           |           |           |           |
|               | Low                | 1.86          | 1.51-2.31 | 1.58      | 1.27-1.97 |                                                |           |           |           |           |
| Economically: | Active             | 1 (=Ref.)     |           | 1 (=Ref.) |           | 0.14                                           |           |           |           |           |
|               | Inactive           | 4.15          | 3.53-4.89 | 3.40      | 2.85-4.04 |                                                |           |           |           |           |
| Family        | Married/cohab.     | 1 (=Ref.)     |           | 1 (=Ref.) |           | 0.82                                           |           |           |           |           |
|               | Single, no childr. | 1.56          | 1.33-1.83 | 1.25      | 1.06-     |                                                |           |           |           |           |

|                  |                 |           |           |           |           |       |           |           |                |
|------------------|-----------------|-----------|-----------|-----------|-----------|-------|-----------|-----------|----------------|
|                  |                 |           |           |           | 1.48      |       |           |           |                |
|                  | Single, childr. | 1.20      | 0.87-1.65 | 0.94      | 0.67-1.31 |       |           |           |                |
| Birth country:   | Sweden          | 1 (=Ref.) |           | 1 (=Ref.) |           | 0.51  |           |           |                |
|                  | Other           | 1.52      | 1.26-1.82 | 1.27      | 1.04-1.55 |       |           |           |                |
| Living area:     | Large city      | 1 (=Ref.) |           | 1 (=Ref.) |           | 0.14  |           |           |                |
|                  | Medium-size     | 1.03      | 0.85-1.24 | 1.16      | 0.96-1.41 |       |           |           |                |
|                  | Small town      | 1.13      | 0.93-1.35 | 1.32      | 1.08-1.61 |       |           |           |                |
| Cancer:          | Yes             | 1 (=Ref.) |           | 1 (=Ref.) |           | 0.38  |           |           |                |
|                  | No              | 2.15      | 1.49-3.08 | 1.85      | 1.27-2.69 |       |           |           |                |
| Mental disorder: | Yes             | 1 (=Ref.) |           | 1 (=Ref.) |           | 0.006 | 1 (=Ref.) | 1 (=Ref.) |                |
|                  | No              | 3.46      | 2.83-4.22 | 2.54      | 2.05-3.14 |       | 3.60      | 2.69-4.83 | 1.90 1.41-2.55 |
| Diabetes:        | Yes             | 1 (=Ref.) |           | 1 (=Ref.) |           | 0.02  | 1 (=Ref.) | 1 (=Ref.) |                |
|                  | No              | 2.01      | 1.60-2.51 | 1.98      | 1.56-2.51 |       | 2.49      | 1.85-3.34 | 1.40 0.94-2.08 |
| Procedure‡:      | Yes             | 1 (=Ref.) |           | 1 (=Ref.) |           | 0.02  | 1 (=Ref.) | 1 (=Ref.) |                |
|                  | No              | 0.81      | 0.62-1.04 | 1.12      | 0.85-1.46 |       | 0.88      | 0.64-1.22 | 2.13 1.33-3.42 |
| Type of event:   | IHD             | 1 (=Ref.) |           | 1 (=Ref.) |           |       |           |           |                |
|                  | Stroke          | 2.64      | 2.27-3.08 | 2.79      | 2.37-     |       |           |           |                |

---

3.29

---

\* Multivariable model; all variables are entered simultaneously into the model

† Estimates are adjusted for all other variables

‡ Medical procedure =coronary artery bypass graft, percutaneous coronary intervention, other coronary distension procedure, or intravenous intracranial procedure

### Differences between IHD and stroke

The following interactions with event type were significant: sex, mental disorder, diabetes, and medical procedure. Women who had suffered an IHD event had 1.62 (95% CI 1.25-2.11) times higher odds of disability pension in the first post-event year than male IHD patients, whereas sex was not associated with disability pension among stroke patients. Among IHD cases, mental disorder was associated with 3.60 (95% CI 2.69-4.83) times higher odds of disability pension during the first post-event year compared with people without a mental disorder, whereas the corresponding odds ratio among stroke cases was 1.90 (95% CI 1.41-2.55). Comorbid diabetes was associated with 2.49 (95% CI 1.85-3.34) times higher odds of disability pension, while it was not associated with the risk of disability pension among people who had suffered a stroke. Among stroke cases, having undergone a medical procedure was associated with 2.13 (95% CI 1.33-3.42) times higher odds of disability pension in the first year after the event than among those who did not receive such procedure (Table 2.) These interactions, and absolute differences between IHD and stroke cases, are further illustrated in Figure 2, where we present percentages of those who ended up on disability pension adjusted for other predictor variables.

### Sensitivity analysis: Disability pension in fifth post-event year

Supplementary Table 1 presents the results regarding the factors associated with the risk of disability pension in the fifth post-event year after an IHD or stroke event. The main effects corresponded to those in first post-event year, but effect modification by event type was observed more often, indicating larger differences between IHD and stroke regarding

1  
2  
3 disability pension in the fifth post-year. Interaction terms observed at first post-year remained  
4  
5 statistically significant, but also several other interactions emerged. Those with less  
6  
7 education, economically inactive, and who were born outside of Sweden were at a higher risk  
8  
9 of disability pension, especially among the IHD cases.  
10  
11  
12  
13  
14  
15  
16  
17  
18  
19  
20  
21  
22  
23  
24  
25  
26  
27  
28  
29  
30  
31  
32  
33  
34  
35  
36  
37  
38  
39  
40  
41  
42  
43  
44  
45  
46  
47  
48  
49  
50  
51  
52  
53  
54  
55  
56  
57  
58  
59  
60

## DISCUSSION

In this population-based longitudinal cohort study of people of working ages in Sweden who had a new IHD or stroke event, we found that the incidence of disability pension was similar five years before the first IHD or stroke event. About 25% of the cohort were already on disability pension one year prior to the event, with significant overrepresentation of socioeconomically disadvantaged. This corresponds to previous studies which have reported pre-event disability pension prevalence of 22–29%. [3, 18-20] We showed that similar sociodemographic characteristics and pre-existing comorbid conditions were associated with pre-event and post-event disability pension.

People who had suffered a stroke had a substantially higher incidence of disability pension after the event (up to 50% during the five subsequent years) than people who had suffered an IHD event (up to 30%). Thus, although the incidence of an IHD event (18 480 cases in three years) was more common than the incidence of stroke (9750 cases in three years), the disability burden of stroke was greater than that of IHD.

Female sex, older age, lower education, economic inactivity, immigrant status, living in rural areas, and having comorbid conditions were all risk factors for disability pension after cardiovascular events, which corresponds to previous studies. [4, 5, 7, 9-12, 21]. The risk of disability pension after the event was higher among women than among men with IHD, but we observed no sex difference regarding stroke. Other research has reported significantly better long-term prognosis among women, [22] but no sex difference in mortality due to stroke. [23] Thus, the higher risk of disability pension after an IHD event among women may reflect women's higher probability of disability pension in general, [24] or may



1  
2  
3 be related to men's higher risk of cardiovascular mortality before disability pension is  
4  
5 granted.  
6  
7

8           As comorbid conditions contributed to exit to disability pension, it is possible  
9  
10 that part of these disability pensions were due to diagnoses other than cardiovascular  
11  
12 diseases. However, as the incidence of disability pension increased markedly after the  
13  
14 cardiovascular event, it is unlikely that comorbid conditions can explain all disability  
15  
16 pensions. Having had medical procedure related to the event was associated with disability  
17  
18 pension shortly after a stroke event. Medical procedure can be viewed as a proxy for the  
19  
20 severity of the event. Thus, risk groups for disability pension shortly after a stroke are those  
21  
22 who suffer a more severe event, which corresponds to previous results regarding return to  
23  
24 work.[4, 5]  
25  
26  
27

28           Although the relative difference in the risk of disability pension between those  
29  
30 with and without comorbid mental disorder and diabetes was larger for IHD cases than for  
31  
32 stroke cases, the highest absolute risk was found among those who had suffered a stroke and  
33  
34 had mental disorder or diabetes. Mental disorders, particularly depression, associated with an  
35  
36 IHD or stroke event might decrease work capacity by reducing functional capacity, and by  
37  
38 preventing the patient from participating in physical rehabilitation and cognitive therapies,  
39  
40 adhering to medical procedures, or making the necessary lifestyle changes needed to achieve  
41  
42 work capacity after IHD or a stroke.[25] Diabetes has been associated with excess risk of  
43  
44 death following myocardial infarction.[26]  
45  
46  
47  
48

49           In Sweden, people can be granted disability pension even without a history of  
50  
51 sick leave. However, even if it is rather likely that the individual will not return to work after,  
52  
53 e.g., a severe stroke, the patient or the relatives seldom apply for disability pension as the  
54  
55 benefit is usually lower than that for sick leave. The main reason for applying for disability  
56  
57  
58  
59  
60

1  
2  
3 pension immediately after the disability event is that one cannot get sickness absence benefits  
4  
5 (not having had income from work or unemployment benefit). Apart from certain specific  
6  
7 exceptions (e.g., ongoing treatment), one cannot be on sick leave for more than 365  
8  
9 consecutive days. Thus, people who were granted disability pension during the first post-  
10  
11 event year were possibly in a poorer labour market position, which prevented them from  
12  
13 applying for sickness absence benefits. This corresponds to our findings, since economic  
14  
15 inactivity was the strongest predictor of disability pension in the first post-event year  
16  
17 regardless of event type. Other indicators of poorer labour market position, such as low  
18  
19 education and birth country other than Sweden, were also predictive of fast exit to disability  
20  
21 pension.  
22  
23

24  
25  
26 Socioeconomic background and comorbid conditions explained the risk of  
27  
28 disability pension five years after the event to a greater extent among IHD than stroke cases.  
29  
30 This is noteworthy, since poorer labour market position and not fulfilling the criteria for  
31  
32 entitlement to sickness absence benefits cannot explain disability pension in the fifth post-  
33  
34 event year. The often higher severity of stroke compared to IHD may explain this difference;  
35  
36 after an IHD event, the probability of recovering to relatively good work capacity may be  
37  
38 higher. However, the observed differences in this recovery seem to relate to socioeconomic  
39  
40 characteristics and resources; the background factors may affect people's recovery and  
41  
42 rehabilitation.[27] Stroke, often a more disabling cardiovascular event, may more totally  
43  
44 reduce work capacity, and hence we found smaller individual differences. However, a  
45  
46 socioeconomic gradient has also been observed in short- and long-term outcomes after a  
47  
48 stroke.[28]  
49  
50  
51  
52

53 The major strength of this study was its large population-based cohort data with  
54  
55 reliable register-based measures of high coverage and specificity,[29] and no loss to follow  
56  
57 up. Compared to previous studies, we also had a longer follow-up – five years – both before  
58  
59  
60

1  
2  
3 and after the event. We were able to include a large set of predictors of disability pension,  
4  
5 including sociodemographic factors, comorbid conditions, and medical procedure.  
6  
7

8           The register data also have some limitations: we were only able to include  
9  
10 information that was available in administrative registers. This meant that we had no  
11  
12 information on quality and outcome of post-event care, individuals' health behaviours or  
13  
14 workplace psychosocial factors, which are typically collected in surveys, and have previously  
15  
16 been linked to disability pension in general populations.[30] However, a recent study among  
17  
18 Finnish public sector employees demonstrated that the contribution of health behaviours and  
19  
20 workplace psychosocial factors to the risk of disability pension was relatively small  
21  
22 compared to the contribution of comorbidity, especially mental comorbidity.[7] Regarding  
23  
24 post-event care, men were more likely to enrol in disease management program than women  
25  
26 after coronary heart disease in Germany.[31] We also did not have direct measure of event  
27  
28 severity, but used medical procedure as a proxy measure. In future studies, also recurrent  
29  
30 events could be included. Finally, the high employment frequency in higher ages and among  
31  
32 women in Sweden as well as the universal coverage with relatively high benefit levels might  
33  
34 limit the generalizability of the results.[32]  
35  
36  
37  
38  
39

40           In a recent study, disability pensioning five years after percutaneous coronary  
41  
42 intervention or coronary artery bypass grafting was fairly common (15-35%) among young  
43  
44 ( $\leq 50$  years) IHD patients.[33] The fact that even after successful surgery and complete  
45  
46 revascularization, these patients often ended up on disability pension lead the authors to  
47  
48 speculate that disability pensioning may be partly explained by patients' and healthcare  
49  
50 professionals' attitudes towards recovery and return to work.[33] In Sweden, at least one  
51  
52 physician and often other health professionals, are involved in the assessments of the disease  
53  
54 the patient has, the functional limitations the disease have led to, and to what extent those  
55  
56 limitations actually might influence the work capacity of the patient and for how long. These  
57  
58  
59  
60

1  
2  
3 assessments are sent to the Social Insurance Agency, where an officer evaluates and decides  
4 whether the patient (=claimant) fulfills the criteria for being granted disability pension or not,  
5 and if so, to what extent (part- or full-time). However, other type of studies are warranted to  
6 shed light on these processes, and perhaps this explorative study can inspire such studies.  
7  
8  
9  
10  
11

## 12 Conclusions

13  
14  
15  
16  
17  
18  
19  
20  
21 Our results quantify and emphasize the burden of IHD and stroke to the labour market, and  
22 can help occupational and other healthcare professionals to identify vulnerable groups at risk  
23 for permanent exclusion from labour market after such an event. While IHD event was more  
24 common, stroke caused more permanent work disability. As regards IHD, non-medical risk  
25 factors contributed to the risk of disability pension, whereas medical factors contributed to  
26 the risk of disability pension after stroke. This knowledge may be beneficial when planning  
27 interventions to prevent permanent work disability after either event.  
28  
29  
30  
31  
32  
33  
34  
35  
36  
37  
38  
39  
40  
41  
42  
43  
44  
45  
46  
47  
48  
49  
50  
51  
52  
53  
54  
55  
56  
57  
58  
59  
60

1  
2  
3 **Contributors:** JE, MV, TL, EMR, and KA contributed to conception and design. JE analysed  
4  
5 the data and drafted the manuscript. All authors contributed either to analysis, interpretation  
6  
7 or acquisition of the data, and critically revised the manuscript. All gave final approval and  
8  
9 agree to be accountable for all aspects ensuring integrity and accuracy.  
10

11  
12 **Funding:** This study was supported by the Swedish Research Council for Health, Working  
13  
14 Life and Welfare. JE, MV, and TL were supported by the Academy of Finland (projects  
15  
16 258598, 292824, 287488). The funding organizations had no role in the study design, data  
17  
18 collection, analysis, interpretation of the data, writing the report, or in the decision to submit  
19  
20 the paper.  
21  
22

23  
24 **Competing interest:** None declared.  
25  
26

27 **Ethics approval:** Ethical approval was obtained from the Regional Ethical Review Board,  
28  
29 Stockholm, Sweden.  
30  
31

32 **Data sharing statement:** No additional data available.  
33  
34  
35  
36  
37  
38  
39  
40  
41  
42  
43  
44  
45  
46  
47  
48  
49  
50  
51  
52  
53  
54  
55  
56  
57  
58  
59  
60

## REFERENCES

- 1 GBD Compare Data Visualization. Seattle, WA: Institute for Health Metrics and Evaluation (IHME), University of Washington 2016.
- 2 Schmidt M, Jacobsen JB, Lash TL, *et al.* 25 year trends in first time hospitalisation for acute myocardial infarction, subsequent short and long term mortality, and the prognostic impact of sex and comorbidity: a Danish nationwide cohort study. *BMJ (Clinical research ed)* 2012;**344**:e356.
- 3 Hamalainen H, Maki J, Virta L, *et al.* Return to work after first myocardial infarction in 1991-1996 in Finland. *Eur J Public Health* 2004;**14**:350-3.
- 4 Peters GO, Buni SG, Oyeyemi AY, *et al.* Determinants of return to work among Nigerian stroke survivors. *Disability and rehabilitation* 2013;**35**:455-9.
- 5 Bonner B, Pillai R, Sarma PS, *et al.* Factors predictive of return to work after stroke in patients with mild-moderate disability in India. *European journal of neurology* 2016;**23**:548-53.
- 6 Catalina-Romero C, Ruilope LM, Sanchez-Chaparro MA, *et al.* Factors influencing return-to-work after cerebrovascular disease: the importance of previous cardiovascular risk. *European journal of preventive cardiology* 2015;**22**:1220-7.
- 7 Ervasti J, Kivimaki M, Pentti J, *et al.* Health- and work-related predictors of work disability among employees with a cardiometabolic disease--A cohort study. *J Psychosom Res* 2016;**82**:41-7.
- 8 Lundbom J, Myhre HO, Ystgaard B, *et al.* Factors influencing return to work after aortocoronary bypass surgery. *Scandinavian journal of thoracic and cardiovascular surgery* 1992;**26**:187-92.
- 9 Jespersen L, Abildstrom SZ, Hvelplund A, *et al.* Symptoms of angina pectoris increase the probability of disability pension and premature exit from the workforce

1  
2  
3 even in the absence of obstructive coronary artery disease. *European heart journal*  
4  
5 2013;**34**:3294-303.

6  
7 10 Osler M, Martensson S, Prescott E, *et al*. Impact of gender, co-morbidity  
8  
9 and social factors on labour market affiliation after first admission for acute coronary  
10  
11 syndrome. A cohort study of Danish patients 2001-2009. *PLoS One* 2014;**9**:e86758.

12  
13 11 Zetterstrom K, Vaez M, Alexanderson K, *et al*. Disability pension after  
14  
15 coronary revascularization: a prospective nationwide register-based Swedish cohort study.  
16  
17 *European journal of preventive cardiology* 2015;**22**:304-11.

18  
19 12 Gunn J, Kiviniemi T, Biancari F, *et al*. Predictors of permanent work  
20  
21 disability among  $\leq 50$ -year-old patients undergoing percutaneous coronary intervention.  
22  
23 *Scand J Work Environ Health* 2015;**41**:460-6.

24  
25 13 Hamer M, Batty GD, Stamatakis E, *et al*. Comparison of risk factors for  
26  
27 fatal stroke and ischemic heart disease: a prospective follow up of the health survey for  
28  
29 England. *Atherosclerosis* 2011;**219**:807-10.

30  
31 14 *International Statistical Classification of Diseases and Related Health*  
32  
33 *Problems (ICD-10)*. Geneva, Switzerland: World Health Organization 1994.

34  
35 15 Deddens JA, Petersen MR. Approaches for estimating prevalence ratios.  
36  
37 *Occupational and environmental medicine* 2008;**65**:481, 501-6.

38  
39 16 Greenland S. Model-based estimation of relative risks and other  
40  
41 epidemiologic measures in studies of common outcomes and in case-control studies.  
42  
43 *American journal of epidemiology* 2004;**160**:301-5.

44  
45 17 Zou G. A modified poisson regression approach to prospective studies with  
46  
47 binary data. *American journal of epidemiology* 2004;**159**:702-6.

48  
49 18 Teasdale TW, Engberg AW. Disability pensions in relation to stroke: a  
50  
51 population study. *Brain injury* 2002;**16**:997-1009.

- 1  
2  
3 19 Medin J, Nordlund A, Ekberg K. Sick leave, disability pension and health-  
4 care-seeking behaviour prior to stroke, among people aged 30-65: a case-control study. *Brain*  
5 *injury* 2007;**21**:457-63.  
6  
7  
8  
9  
10 20 Zetterstrom K, Voss M, Alexanderson K, *et al.* Disability Pension at the  
11 Time of Coronary Revascularisation Is Associated with Higher Five-Year Mortality; A  
12 Swedish Nationwide, Register-Based Prospective Cohort Study. *PLoS One*  
13 2015;**10**:e0135277.  
14  
15  
16  
17  
18 21 Dreyer RP, Xu X, Zhang W, *et al.* Return to Work After Acute Myocardial  
19 Infarction: Comparison Between Young Women and Men. *Circulation Cardiovascular*  
20 *quality and outcomes* 2016;**9**:S45-52.  
21  
22  
23  
24  
25 22 van der Meer MG, Cramer MJ, van der Graaf Y, *et al.* Gender difference in  
26 long-term prognosis among patients with cardiovascular disease. *European journal of*  
27 *preventive cardiology* 2014;**21**:81-9.  
28  
29  
30  
31  
32 23 Mosca L, Barrett-Connor E, Wenger NK. Sex/gender differences in  
33 cardiovascular disease prevention: what a difference a decade makes. *Circulation*  
34 2011;**124**:2145-54.  
35  
36  
37  
38  
39 24 Falkstedt D, Backhans M, Lundin A, *et al.* Do working conditions explain  
40 the increased risks of disability pension among men and women with low education? A  
41 follow-up of Swedish cohorts. *Scand J Work Environ Health* 2014;**40**:483-92.  
42  
43  
44  
45 25 Kutlubaev MA, Hackett ML. Part II: predictors of depression after stroke  
46 and impact of depression on stroke outcome: an updated systematic review of observational  
47 studies. *International journal of stroke : official journal of the International Stroke Society*  
48 2014;**9**:1026-36.  
49  
50  
51  
52  
53  
54  
55  
56  
57  
58  
59  
60



- 1  
2  
3 26 Alabas OA, Hall M, Dondo TB, *et al.* Long-term excess mortality  
4 associated with diabetes following acute myocardial infarction: a population-based cohort  
5 study. *J Epidemiol Community Health* 2017;**71**:25-32.  
6  
7  
8  
9  
10 27 Myers V, Drory Y, Goldbourt U, *et al.* Multilevel socioeconomic status and  
11 incidence of frailty post myocardial infarction. *Int J Cardiol* 2014;**170**:338-43.  
12  
13  
14 28 Marshall IJ, Wang Y, Crichton S, *et al.* The effects of socioeconomic status  
15 on stroke risk and outcomes. *The Lancet Neurology* 2015;**14**:1206-18.  
16  
17  
18 29 Ludvigsson JF, Andersson E, Ekbom A, *et al.* External review and  
19 validation of the Swedish national inpatient register. *BMC Public Health* 2011;**11**:450.  
20  
21  
22  
23 30 Albertsen K, Lund T, Christensen KB, *et al.* Predictors of disability pension  
24 over a 10-year period for men and women. *Scand J Public Health* 2007;**35**:78-85.  
25  
26  
27 31 Bozorgmehr K, Maier W, Brenner H, *et al.* Social disparities in Disease  
28 Management Programmes for coronary heart disease in Germany: a cross-classified  
29 multilevel analysis. *J Epidemiol Community Health* 2015;**69**:1091-101.  
30  
31  
32  
33 32 Arts W, Gelissen J. Three worlds of welfare capitalism or more? A state-of-  
34 the-art report. *Journal of European Social Policy* 2002;**12**:137-58.  
35  
36  
37  
38 33 Lautamäki A, Gunn JM, Airaksinen KEJ, *et al.* Permanent work disability  
39 in patients  $\leq 50$  years old after percutaneous coronary intervention and coronary artery bypass  
40 grafting (the CRAGS study). *Eur Heart J Qual Care Clin Outcomes* 2017;**3**:101-6.  
41  
42  
43  
44  
45  
46  
47  
48  
49  
50  
51  
52  
53  
54  
55  
56  
57  
58  
59  
60

1  
2  
3 **Figure legends:**  
4  
5  
6  
7

8  
9 **Figure 1.** Cumulative incidence of disability pension 5 years before and 5 years after  
10 cardiovascular event, unadjusted. The arrow indicates the event. IHD=ischemic heart disease.  
11  
12

13  
14  
15  
16  
17 **Figure 2.** Adjusted percentage of people suffering an IHD or stroke event ending up on  
18 disability pension during first post-event year. Exponentiated least square means ( $\times 100$ )  
19 adjusted for sex, age, education, economic inactivity, family situation, birth country, type of  
20 living area, mental disorder, diabetes, cancer, and medical procedure. Error bars indicate 95%  
21 confidence intervals. IHD=ischemic heart disease.  
22  
23  
24  
25  
26  
27  
28  
29  
30  
31  
32  
33  
34  
35  
36  
37  
38  
39  
40  
41  
42  
43  
44  
45  
46  
47  
48  
49  
50  
51  
52  
53  
54  
55  
56  
57  
58  
59  
60



Figure 1. Cumulative incidence of disability pension 5 years before and 5 years after cardiovascular event, unadjusted. The arrow indicates the event. IHD=ischemic heart disease.

review only



Figure 2. Adjusted percentage of people suffering an IHD or stroke event ending up on disability pension during first post-event year. Exponentiated least square means ( $\times 100$ ) adjusted for sex, age, education, economic inactivity, family situation, birth country, type of living area, mental disorder, diabetes, cancer, and medical procedure. Error bars indicate 95% confidence intervals. IHD=ischemic heart disease.

Supplementary Table 1. Predictors of disability pension in five year follow-up after cardiovascular (ischemic heart disease or stroke) event. In case of significant interaction ( $p < 0.05$ ), analyses are stratified by event type.

|                |                    | IHD or stroke |           |           |           | P for interaction with event type (IHD/stroke) | IHD       |           | Stroke    |           |
|----------------|--------------------|---------------|-----------|-----------|-----------|------------------------------------------------|-----------|-----------|-----------|-----------|
|                |                    | Crude RR      | 95% CI    | RR*       | 95% CI    |                                                | RR†       | 95% CI    | RR†       | 95% CI    |
| Age:           | ≤50 years          | 1 (=Ref.)     |           | 1 (=Ref.) |           | 0.99                                           |           |           |           |           |
|                | >50 years          | 1.23          | 1.14-1.32 | 1.45      | 1.35-1.57 |                                                |           |           |           |           |
| Sex:           | Men                | 1 (=Ref.)     |           | 1 (=Ref.) |           | <0.001                                         | 1 (=Ref.) |           | 1 (=Ref.) |           |
|                | Women              | 1.77          | 1.65-1.90 | 1.45      | 1.35-1.55 |                                                | 1.81      | 1.60-2.04 | 1.29      | 1.10-1.40 |
| Education:     | High               | 1 (=Ref.)     |           | 1 (=Ref.) |           | 0.013                                          | 1 (=Ref.) |           | 1 (=Ref.) |           |
|                | Intermediate       | 1.11          | 1.02-1.21 | 1.11      | 1.02-1.21 |                                                | 1.07      | 0.92-1.25 | 1.13      | 1.02-1.26 |
|                | Low                | 1.30          | 1.19-1.43 | 1.29      | 1.17-1.42 |                                                | 1.46      | 1.24-1.71 | 1.20      | 1.07-1.36 |
| Economically:  | Active             | 1 (=Ref.)     |           | 1 (=Ref.) |           | <0.001                                         | 1 (=Ref.) |           | 1 (=Ref.) |           |
|                | Inactive           | 1.54          | 1.41-1.68 | 1.35      | 1.23-1.48 |                                                | 1.78      | 1.54-2.05 | 1.16      | 1.03-1.30 |
| Family         | Married/cohab.     | 1 (=Ref.)     |           | 1 (=Ref.) |           | 0.19                                           |           |           |           |           |
|                | Single, no childr. | 1.19          | 1.11-1.27 | 1.11      | 1.03-1.19 |                                                |           |           |           |           |
|                | Single, childr.    | 1.22          | 1.07-1.39 | 1.04      | 0.91-1.19 |                                                |           |           |           |           |
| Birth country: | Sweden             | 1 (=Ref.)     |           | 1 (=Ref.) |           | <0.001                                         | 1 (=Ref.) |           | 1 (=Ref.) |           |

1  
2  
3  
4  
5  
6  
7  
8  
9  
10  
11  
12  
13  
14  
15  
16  
17  
18  
19  
20  
21  
22  
23  
24  
25  
26  
27  
28  
29  
30  
31  
32  
33  
34  
35  
36  
37  
38  
39  
40  
41  
42  
43  
44  
45  
46  
47

|                  |             |           |           |           |           |        |           |           |           |           |
|------------------|-------------|-----------|-----------|-----------|-----------|--------|-----------|-----------|-----------|-----------|
|                  | Other       | 1.15      | 1.06-1.26 | 1.20      | 1.10-1.31 |        | 1.49      | 1.30-1.70 | 1.04      | 0.92-1.17 |
| Living area:     | Large city  | 1 (=Ref.) |           | 1 (=Ref.) |           | 0.77   |           |           |           |           |
|                  | Medium-size | 1.19      | 1.10-1.29 | 1.26      | 1.16-1.36 |        |           |           |           |           |
|                  | Small town  | 1.18      | 1.08-1.28 | 1.27      | 1.17-1.39 |        |           |           |           |           |
| Cancer:          | Yes         | 1 (=Ref.) |           | 1 (=Ref.) |           | 0.065  |           |           |           |           |
|                  | No          | 1.47      | 1.20-1.79 | 1.32      | 1.08-1.61 |        |           |           |           |           |
| Mental disorder: | Yes         | 1 (=Ref.) |           | 1 (=Ref.) |           | <0.001 | 1 (=Ref.) |           | 1 (=Ref.) |           |
|                  | No          | 1.76      | 1.58-1.96 | 1.52      | 1.36-1.70 |        | 2.35      | 1.99-2.78 | 1.19      | 1.03-1.38 |
| Diabetes:        | Yes         | 1 (=Ref.) |           | 1 (=Ref.) |           | <0.001 | 1 (=Ref.) |           | 1 (=Ref.) |           |
|                  | No          | 1.45      | 1.30-1.63 | 1.64      | 1.46-1.83 |        | 2.05      | 1.76-2.39 | 1.30      | 1.10-1.54 |
| Procedure‡:      | Yes         | 1 (=Ref.) |           | 1 (=Ref.) |           | 0.28   |           |           |           |           |
|                  | No          | 0.83      | 0.74-0.93 | 1.29      | 1.15-1.45 |        |           |           |           |           |
| Type of event:   | IHD         | 1 (=Ref.) |           | 1 (=Ref.) |           |        |           |           |           |           |
|                  | Stroke      | 3.64      | 3.39-3.90 | 3.77      | 3.50-4.06 |        |           |           |           |           |

\* Multivariable model; all variables are entered simultaneously into the model

† Estimates are adjusted for all other variables

‡ Medical procedure =coronary artery bypass graft, percutaneous transluminal coronary angioplasty, other coronary distension procedure, or intravenous intracranial procedure

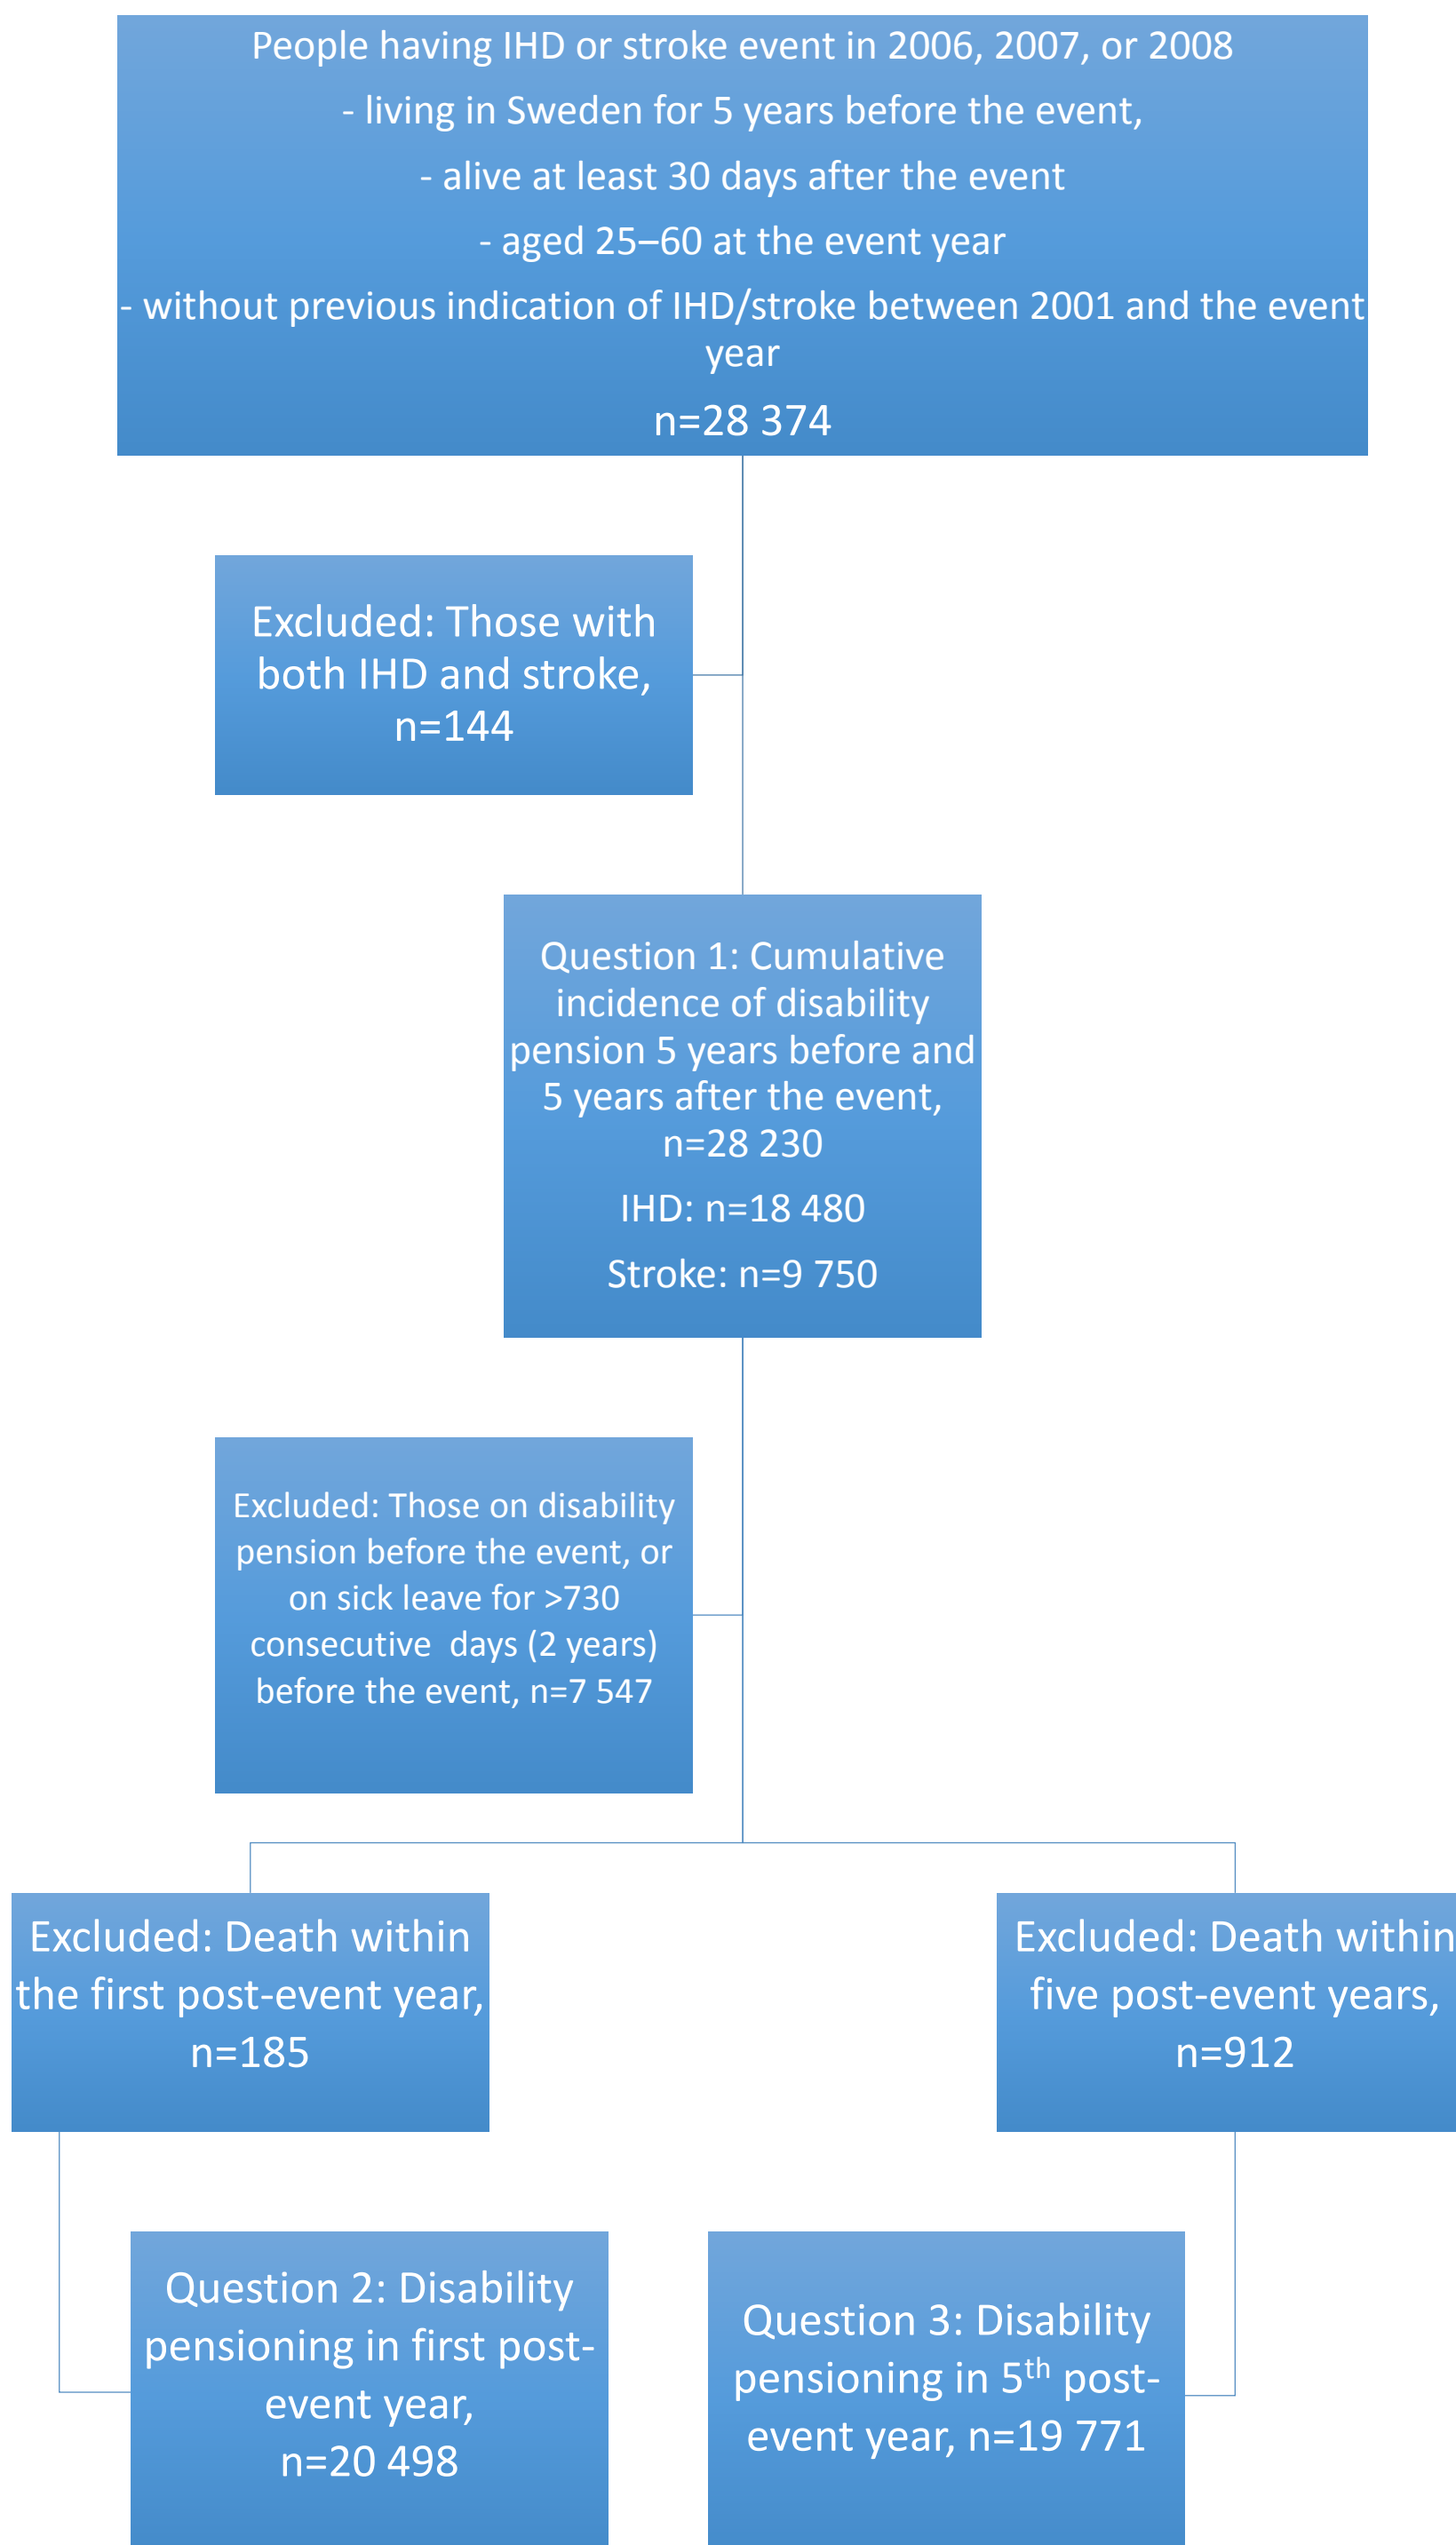

Supplementary Figure 1. Flow chart of study inclusion and exclusion criteria.

## STROBE Statement—checklist of items that should be included in reports of observational studies

|                              | Item No | Recommendation                                                                                                                                                                                                                                                                                                                                                                                                                                                         | Page                    |
|------------------------------|---------|------------------------------------------------------------------------------------------------------------------------------------------------------------------------------------------------------------------------------------------------------------------------------------------------------------------------------------------------------------------------------------------------------------------------------------------------------------------------|-------------------------|
| Title and abstract           | 1       | (a) Indicate the study's design with a commonly used term in the title or the abstract                                                                                                                                                                                                                                                                                                                                                                                 | 1                       |
|                              |         | (b) Provide in the abstract an informative and balanced summary of what was done and what was found                                                                                                                                                                                                                                                                                                                                                                    | 2                       |
| <b>Introduction</b>          |         |                                                                                                                                                                                                                                                                                                                                                                                                                                                                        |                         |
| Background/rationale         | 2       | Explain the scientific background and rationale for the investigation being reported                                                                                                                                                                                                                                                                                                                                                                                   | 4                       |
| Objectives                   | 3       | State specific objectives, including any prespecified hypotheses                                                                                                                                                                                                                                                                                                                                                                                                       | 4-5                     |
| <b>Methods</b>               |         |                                                                                                                                                                                                                                                                                                                                                                                                                                                                        |                         |
| Study design                 | 4       | Present key elements of study design early in the paper                                                                                                                                                                                                                                                                                                                                                                                                                | 6                       |
| Setting                      | 5       | Describe the setting, locations, and relevant dates, including periods of recruitment, exposure, follow-up, and data collection                                                                                                                                                                                                                                                                                                                                        | 6-7                     |
| Participants                 | 6       | (a) <i>Cohort study</i> —Give the eligibility criteria, and the sources and methods of selection of participants. Describe methods of follow-up<br><i>Case-control study</i> —Give the eligibility criteria, and the sources and methods of case ascertainment and control selection. Give the rationale for the choice of cases and controls<br><i>Cross-sectional study</i> —Give the eligibility criteria, and the sources and methods of selection of participants | 6-7                     |
|                              |         | (b) <i>Cohort study</i> —For matched studies, give matching criteria and number of exposed and unexposed<br><i>Case-control study</i> —For matched studies, give matching criteria and the number of controls per case                                                                                                                                                                                                                                                 |                         |
| Variables                    | 7       | Clearly define all outcomes, exposures, predictors, potential confounders, and effect modifiers. Give diagnostic criteria, if applicable                                                                                                                                                                                                                                                                                                                               | 7-8                     |
| Data sources/<br>measurement | 8*      | For each variable of interest, give sources of data and details of methods of assessment (measurement). Describe comparability of assessment methods if there is more than one group                                                                                                                                                                                                                                                                                   | 7-8                     |
| Bias                         | 9       | Describe any efforts to address potential sources of bias                                                                                                                                                                                                                                                                                                                                                                                                              | 6,7                     |
| Study size                   | 10      | Explain how the study size was arrived at                                                                                                                                                                                                                                                                                                                                                                                                                              | Supplementary<br>Fig 1. |
| Quantitative variables       | 11      | Explain how quantitative variables were handled in the analyses. If applicable, describe which groupings were chosen and why                                                                                                                                                                                                                                                                                                                                           | 7-8                     |
| Statistical methods          | 12      | (a) Describe all statistical methods, including those used to control for confounding                                                                                                                                                                                                                                                                                                                                                                                  | 8-9                     |
|                              |         | (b) Describe any methods used to examine subgroups and                                                                                                                                                                                                                                                                                                                                                                                                                 | 9                       |



|                   |     |                                                                                                                                                                                                              |                                 |
|-------------------|-----|--------------------------------------------------------------------------------------------------------------------------------------------------------------------------------------------------------------|---------------------------------|
|                   |     | interactions                                                                                                                                                                                                 |                                 |
|                   |     | (c) Explain how missing data were addressed                                                                                                                                                                  | no missing data                 |
|                   |     | (d) <i>Cohort study</i> —If applicable, explain how loss to follow-up was addressed                                                                                                                          | no loss to follow-up            |
|                   |     | <i>Case-control study</i> —If applicable, explain how matching of cases and controls was addressed                                                                                                           |                                 |
|                   |     | <i>Cross-sectional study</i> —If applicable, describe analytical methods taking account of sampling strategy                                                                                                 |                                 |
|                   |     | € Describe any sensitivity analyses                                                                                                                                                                          | 9                               |
| <b>Results</b>    |     |                                                                                                                                                                                                              |                                 |
| Participants      | 13* | (a) Report numbers of individuals at each stage of study—eg numbers potentially eligible, examined for eligibility, confirmed eligible, included in the study, completing follow-up, and analysed            | Supplementary Fig 1.            |
|                   |     | (b) Give reasons for non-participation at each stage                                                                                                                                                         | Supplementary Fig 1.            |
|                   |     | (c) Consider use of a flow diagram                                                                                                                                                                           | Supplementary Fig 1.            |
| Descriptive data  | 14* | (a) Give characteristics of study participants (eg demographic, clinical, social) and information on exposures and potential confounders                                                                     | Table 1                         |
|                   |     | (b) Indicate number of participants with missing data for each variable of interest                                                                                                                          | no missing data                 |
|                   |     | (c) <i>Cohort study</i> —Summarise follow-up time (eg, average and total amount)                                                                                                                             | Supplementary Fig 1.            |
| Outcome data      | 15* | <i>Cohort study</i> —Report numbers of outcome events or summary measures over time                                                                                                                          | Table 1                         |
|                   |     | <i>Case-control study</i> —Report numbers in each exposure category, or summary measures of exposure                                                                                                         |                                 |
|                   |     | <i>Cross-sectional study</i> —Report numbers of outcome events or summary measures                                                                                                                           |                                 |
| Main results      | 16  | (a) Give unadjusted estimates and, if applicable, confounder-adjusted estimates and their precision (eg, 95% confidence interval). Make clear which confounders were adjusted for and why they were included | Table 2                         |
|                   |     | (b) Report category boundaries when continuous variables were categorized                                                                                                                                    |                                 |
|                   |     | (c) If relevant, consider translating estimates of relative risk into absolute risk for a meaningful time period                                                                                             | Figure 1, Figure 2              |
| Other analyses    | 17  | Report other analyses done—eg analyses of subgroups and interactions, and sensitivity analyses                                                                                                               | Table 2, Supplementary Table 1. |
| <b>Discussion</b> |     |                                                                                                                                                                                                              |                                 |
| Key results       | 18  | Summarise key results with reference to study objectives                                                                                                                                                     | 19-20                           |
| Limitations       | 19  | Discuss limitations of the study, taking into account sources of potential bias or imprecision. Discuss both direction and magnitude of any potential bias                                                   | 22                              |

|   |                  |    |                                                                         |
|---|------------------|----|-------------------------------------------------------------------------|
| 1 |                  |    |                                                                         |
| 2 | Interpretation   | 20 | Give a cautious overall interpretation of results considering           |
| 3 |                  |    | objectives, limitations, multiplicity of analyses, results from similar |
| 4 |                  |    | studies, and other relevant evidence                                    |
| 5 |                  |    |                                                                         |
| 6 | Generalisability | 21 | Discuss the generalisability (external validity) of the study results   |
| 7 |                  |    |                                                                         |

---

#### Other information

---

|    |         |    |                                                                       |
|----|---------|----|-----------------------------------------------------------------------|
| 8  | Funding | 22 | Give the source of funding and the role of the funders for the        |
| 9  |         |    | present study and, if applicable, for the original study on which the |
| 10 |         |    | present article is based                                              |
| 11 |         |    |                                                                       |
| 12 |         |    |                                                                       |

\*Give information separately for cases and controls in case-control studies and, if applicable, for exposed and unexposed groups in cohort and cross-sectional studies.

**Note:** An Explanation and Elaboration article discusses each checklist item and gives methodological background and published examples of transparent reporting. The STROBE checklist is best used in conjunction with this article (freely available on the Web sites of PLoS Medicine at <http://www.plosmedicine.org/>, Annals of Internal Medicine at <http://www.annals.org/>, and Epidemiology at <http://www.epidem.com/>). Information on the STROBE Initiative is available at [www.strobe-statement.org](http://www.strobe-statement.org).
