# Supplementary material for: Permanent work disability before and after ischaemic heart disease or stroke event: a nationwide population-based cohort study in Sweden
Source: PubMed Central journal article supplement — BMJ Open. 2017 Sep 29;7(9):e017910. doi: 10.1136/bmjopen-2017-017910 (PMC5640121; doi:10.1136/bmjopen-2017-017910), 2017-09-29
Supplement: bmjopen-2017-017910supp001.pdf [file bmjopen-2017-017910supp001.pdf]

Supplementary Table 1. Predictors of disability pension in five year follow-up after cardiovascular (ischemic heart disease or stroke) event. In case of significant interaction ( $p < 0.05$ ), analyses are stratified by event type.

|                |                    | IHD or stroke |           |           |           | P for interaction with event type (IHD/stroke) | IHD       |           | Stroke    |           |  |
|----------------|--------------------|---------------|-----------|-----------|-----------|------------------------------------------------|-----------|-----------|-----------|-----------|--|
|                |                    | Crude RR      | 95% CI    | RR*       | 95% CI    |                                                | RR†       | 95% CI    | RR†       | 95% CI    |  |
| Age:           | ≤50 years          | 1 (=Ref.)     |           | 1 (=Ref.) |           | 0.99                                           |           |           |           |           |  |
|                | >50 years          | 1.23          | 1.14-1.32 | 1.45      | 1.35-1.57 |                                                |           |           |           |           |  |
| Sex:           | Men                | 1 (=Ref.)     |           | 1 (=Ref.) |           | <0.001                                         | 1 (=Ref.) |           | 1 (=Ref.) |           |  |
|                | Women              | 1.77          | 1.65-1.90 | 1.45      | 1.35-1.55 |                                                | 1.81      | 1.60-2.04 | 1.29      | 1.10-1.40 |  |
| Education:     | High               | 1 (=Ref.)     |           | 1 (=Ref.) |           | 0.013                                          | 1 (=Ref.) |           | 1 (=Ref.) |           |  |
|                | Intermediate       | 1.11          | 1.02-1.21 | 1.11      | 1.02-1.21 |                                                | 1.07      | 0.92-1.25 | 1.13      | 1.02-1.26 |  |
|                | Low                | 1.30          | 1.19-1.43 | 1.29      | 1.17-1.42 |                                                | 1.46      | 1.24-1.71 | 1.20      | 1.07-1.36 |  |
| Economically:  | Active             | 1 (=Ref.)     |           | 1 (=Ref.) |           | <0.001                                         | 1 (=Ref.) |           | 1 (=Ref.) |           |  |
|                | Inactive           | 1.54          | 1.41-1.68 | 1.35      | 1.23-1.48 |                                                | 1.78      | 1.54-2.05 | 1.16      | 1.03-1.30 |  |
| Family         | Married/cohab.     | 1 (=Ref.)     |           | 1 (=Ref.) |           | 0.19                                           |           |           |           |           |  |
|                | Single, no childr. | 1.19          | 1.11-1.27 | 1.11      | 1.03-1.19 |                                                |           |           |           |           |  |
|                | Single, childr.    | 1.22          | 1.07-1.39 | 1.04      | 0.91-1.19 |                                                |           |           |           |           |  |
| Birth country: | Sweden             | 1 (=Ref.)     |           | 1 (=Ref.) |           | <0.001                                         | 1 (=Ref.) |           | 1 (=Ref.) |           |  |

|                  |             |           |           |           |           |        |           |           |           |           |
|------------------|-------------|-----------|-----------|-----------|-----------|--------|-----------|-----------|-----------|-----------|
|                  | Other       | 1.15      | 1.06-1.26 | 1.20      | 1.10-1.31 |        | 1.49      | 1.30-1.70 | 1.04      | 0.92-1.17 |
| Living area:     | Large city  | 1 (=Ref.) |           | 1 (=Ref.) |           | 0.77   |           |           |           |           |
|                  | Medium-size | 1.19      | 1.10-1.29 | 1.26      | 1.16-1.36 |        |           |           |           |           |
|                  | Small town  | 1.18      | 1.08-1.28 | 1.27      | 1.17-1.39 |        |           |           |           |           |
| Cancer:          | No          | 1 (=Ref.) |           | 1 (=Ref.) |           | 0.065  |           |           |           |           |
|                  | Yes         | 1.47      | 1.20-1.79 | 1.32      | 1.08-1.61 |        |           |           |           |           |
| Mental disorder: | No          | 1 (=Ref.) |           | 1 (=Ref.) |           | <0.001 | 1 (=Ref.) |           | 1 (=Ref.) |           |
|                  | Yes         | 1.76      | 1.58-1.96 | 1.52      | 1.36-1.70 |        | 2.35      | 1.99-2.78 | 1.19      | 1.03-1.38 |
| Diabetes:        | No          | 1 (=Ref.) |           | 1 (=Ref.) |           | <0.001 | 1 (=Ref.) |           | 1 (=Ref.) |           |
|                  | Yes         | 1.45      | 1.30-1.63 | 1.64      | 1.46-1.83 |        | 2.05      | 1.76-2.39 | 1.30      | 1.10-1.54 |
| Procedure‡:      | No          | 1 (=Ref.) |           | 1 (=Ref.) |           | 0.28   |           |           |           |           |
|                  | Yes         | 0.83      | 0.74-0.93 | 1.29      | 1.15-1.45 |        |           |           |           |           |
| Type of event:   | IHD         | 1 (=Ref.) |           | 1 (=Ref.) |           |        |           |           |           |           |
|                  | Stroke      | 3.64      | 3.39-3.90 | 3.77      | 3.50-4.06 |        |           |           |           |           |

\* Multivariable model; all variables are entered simultaneously into the model

† Estimates are adjusted for all other variables

‡ Medical procedure =coronary artery bypass graft, percutaneous transluminal coronary angioplasty, other coronary distension procedure, or intravenous intracranial procedure
