# Supplementary figures and images for: Permanent work disability before and after ischaemic heart disease or stroke event: a nationwide population-based cohort study in Sweden
Source: PubMed Central journal article supplement — BMJ Open. 2017 Sep 29;7(9):e017910. doi: 10.1136/bmjopen-2017-017910 (PMC5640121; doi:10.1136/bmjopen-2017-017910), 2017-09-29

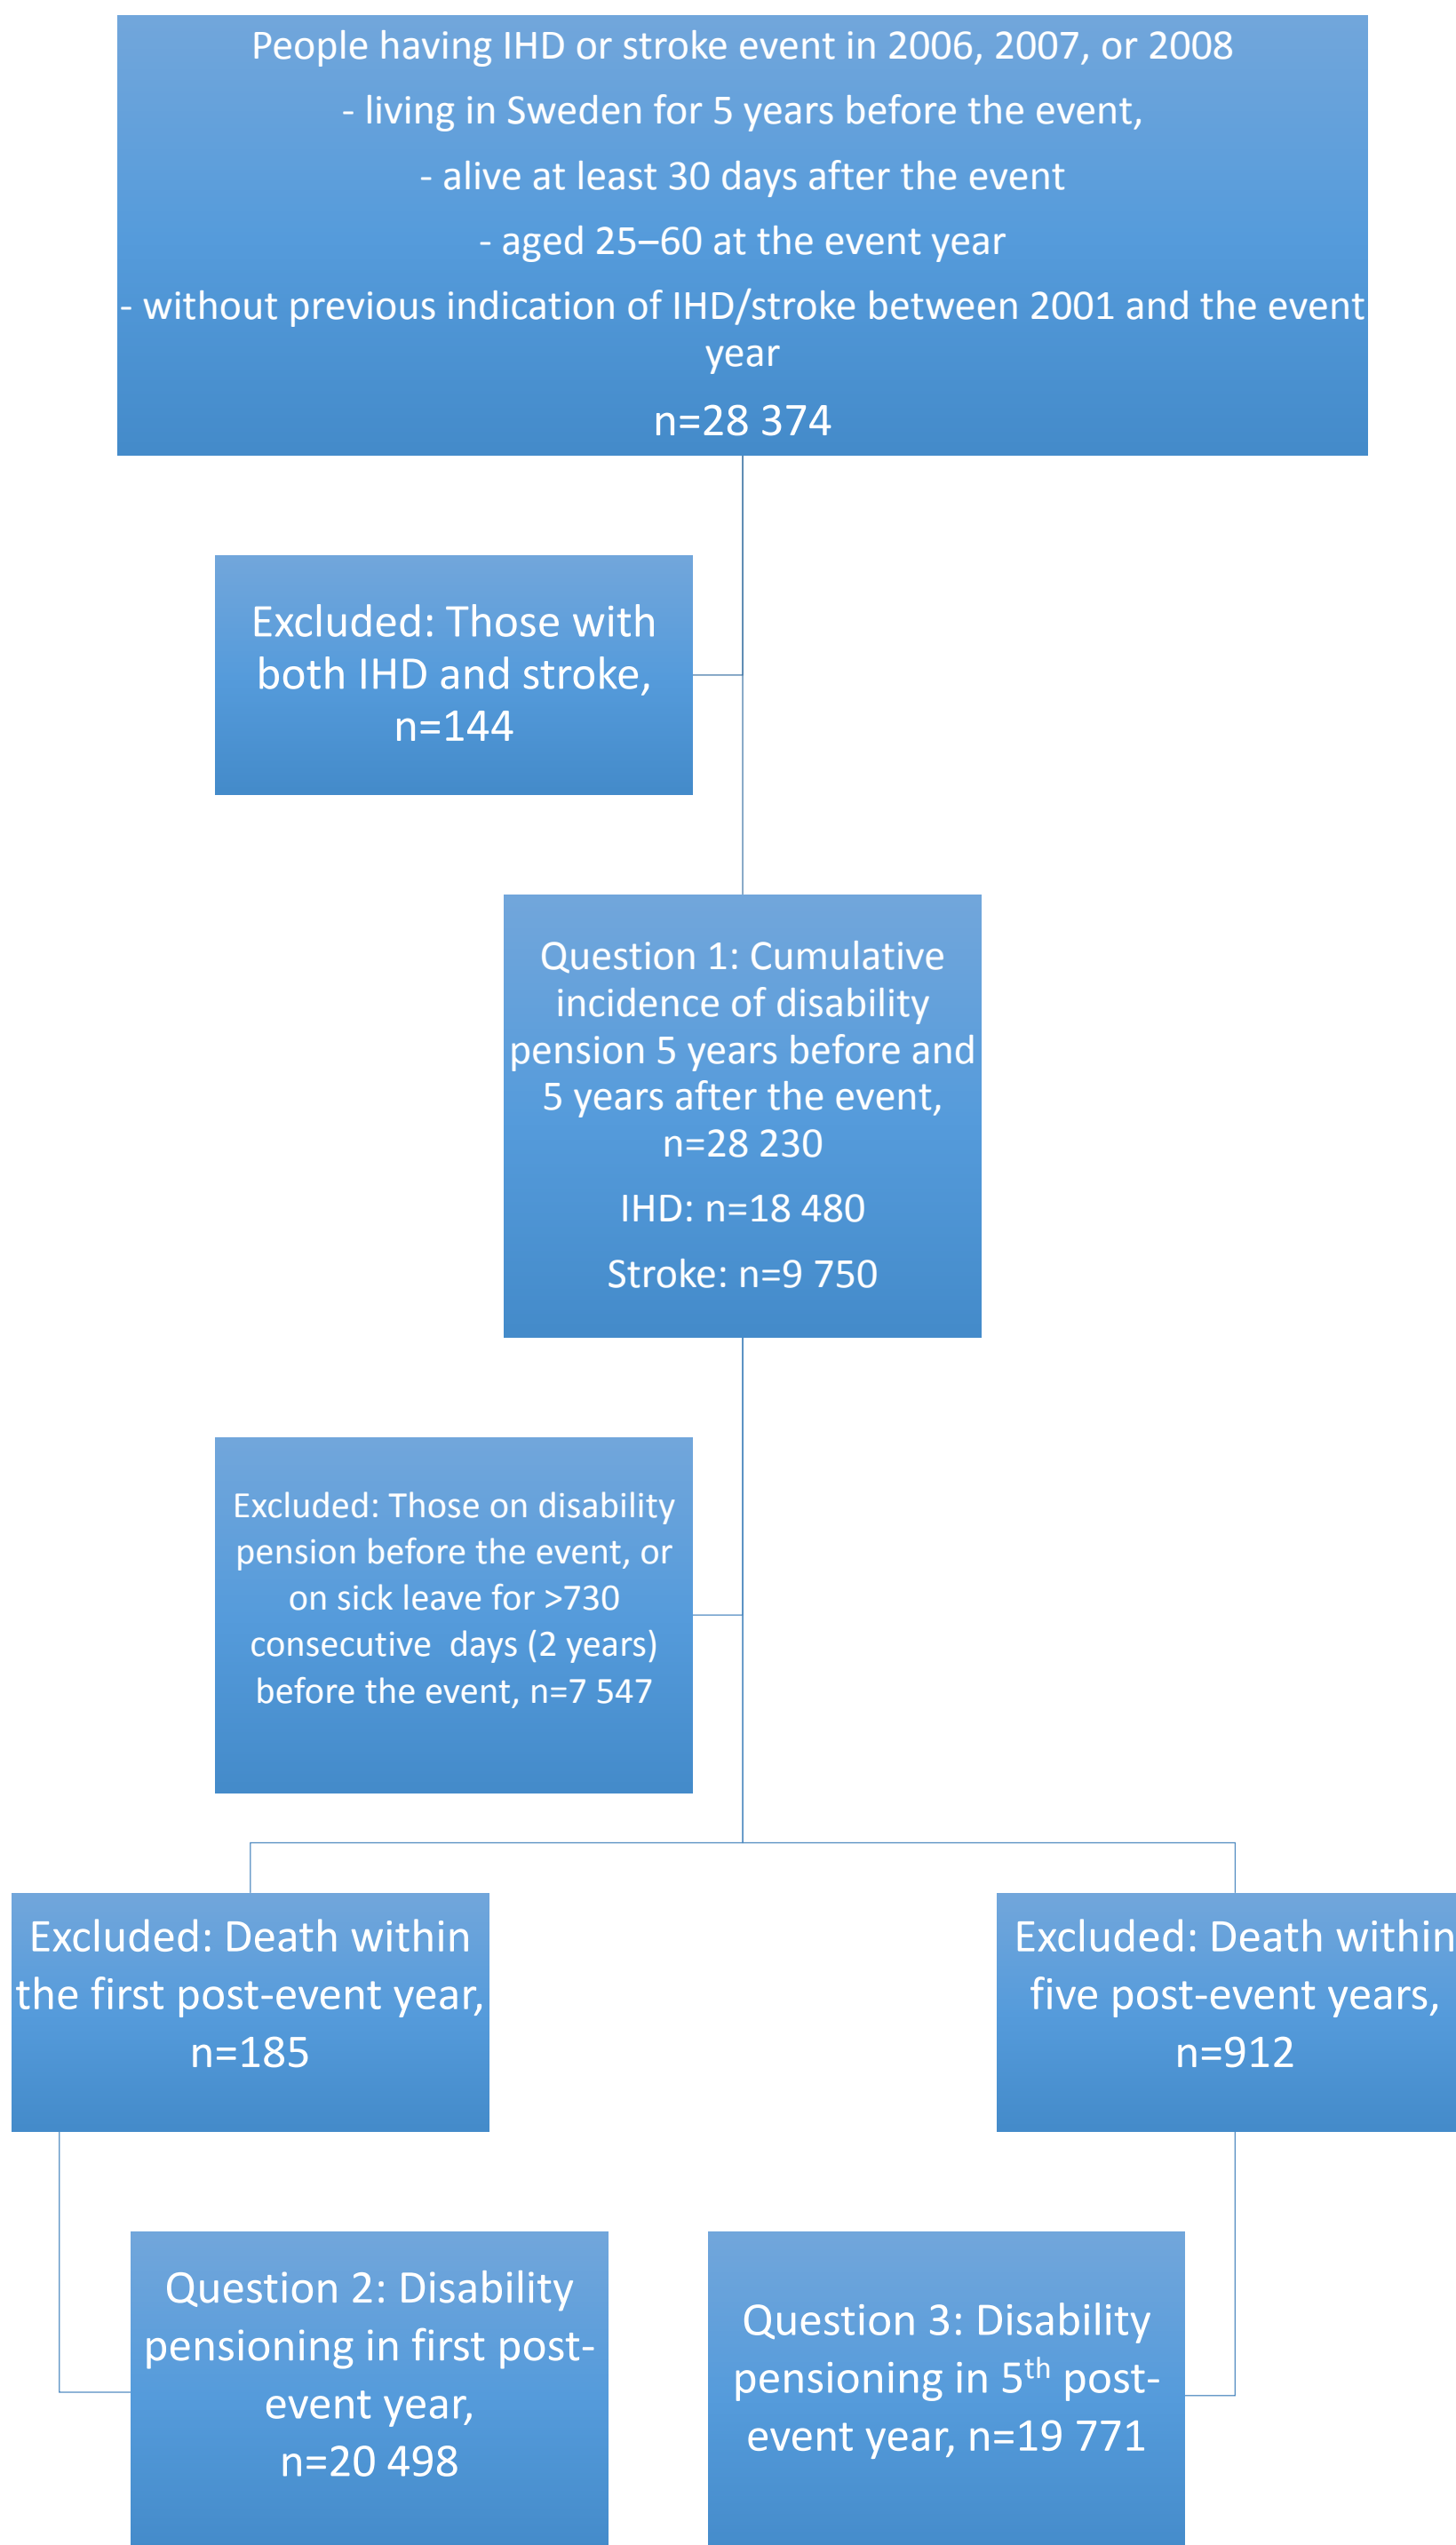

Supplementary Figure 1. Flow chart of study inclusion and exclusion criteria.

Supplement: bmjopen-2017-017910supp002.pdf [file bmjopen-2017-017910supp002.pdf]
